# Supplementary material
Source: PubMed Central journal article supplement (PMC4444528)
Supplement: NIHMS63446-supplement-1.pdf [file NIHMS63446-supplement-1.pdf]

---

---

## Supplementary Discussions

### 1. Redundancy of *Lokiarchaeum* composite genome

Single-marker phylogenies revealed that approximately six highly similar strains from the same DSAG clade were present in LCGC14AMP and LCGC14. Such a high level of micro-diversity prevented us to assemble a complete, non-redundant *Lokiarchaeum* genome. However, micro-diversity could significantly be reduced by using very stringent filters, based on read coverage (see Suppl. Methods). The final *Lokiarchaeum* composite genome has an estimated genome redundancy of 1.4 fold. Out of 162 assumed single copy genes, 71 are duplicated and three are triplicated. In the case of triplicated genes, the third copy is always a partial match and shows 100% identity to part of one of the other copies. Two of them are located at contig edges. The median identity between the duplicated single copy genes is 94.94 % and shows the high similarity of the *lokiarchaeal* strains present in the final bin.

### 2. Phylogenetic assessment of the *Lokiarchaeota*-Eukarya affiliation

Phylogenetic inference of deep evolutionary relations are often very hard to resolve as these are potentially influenced by a number of artifacts<sup>1</sup>. This is especially relevant within the framework of the current work, which aims to place eukaryotes in the Tree of Life, which contains several long branches as a result of rapidly evolving lineages and/or poor taxonomic sampling. We have tried to address and minimise the effects of potential artefacts on our phylogenetic inferences in a number of ways. First, we have used methods that have been designed to model sequence heterogeneity<sup>2</sup> by using a Bayesian framework that employs site-heterogeneous mixture models of amino acid replacement<sup>3</sup>, which have improved model fit that have been shown to be able to suppress long-branch attraction artifacts (e.g. see references 4,5). Our Bayesian

analyses of the concatenated protein datasets of 36 carefully selected single copy marker genes unequivocally supported the phylogenetic affiliation between Lokiarchaeota and eukaryotes with the highest possible support (PP = 1.00; Fig. 2b and Suppl. Fig. S8). While the Lokiarchaeota+eukaryotes support in the ML analyses of the same dataset is still regarded significant (BS = 80), we suspected that this analysis was affected by phylogenetic artefacts that were embedded in the concatenated protein dataset. To investigate this further, a number of ML analyses were performed to assess the robustness of the phylogenetic affiliation between Lokiarchaeota and eukaryotes. Since phylogenetic analyses based solely on ribosomal proteins have been shown to perform poorly in placing deep-rooting lineages due to compositional bias<sup>6,7</sup>, an analysis was performed in which the ribosomal protein (RP) markers (21 markers) were analysed separately from the non-ribosomal markers (15 markers). A ML phylogeny solely based on the RP dataset was found to weakly support eukaryotes grouping with Korarchaeota ('KE'; BS=35; Suppl. Fig. S10), whereas a phylogeny based on non-RP dataset supported, with higher confidence, eukaryotes grouping within Lokiarchaeota ('LE'; BS=71; Suppl. Fig. S11). These results indicate that the phylogenomic affiliation between Korarchaeota and eukaryotes is probably induced by compositional bias that is embedded in the ribosomal protein sequences. Next, we assessed the effect of amino acid composition biases as follows: sites in the reference alignment were ranked by the amount of their contribution to the overall amino acid bias, and partial alignments were built, adding increasing amounts of either the most or the least diverse sites<sup>8,9</sup>. Maximum likelihood phylogenies were then run and the BS for three critical bipartitions in the tree were assessed: eukaryotes grouping with either Lokiarchaeota ('LE'), with Korarchaeota ('KE'), or with all members of the TACK superphylum, including Lokiarchaeota ('TACKLE') (Suppl. Fig. S12). This analysis revealed strong support

for eukaryotes grouping with TACK ('TACKLE') as well as for the Lokiarchaeota-Eukarya affiliation ('LE'): With the least diverse sites, the overall support for TACKLE reaches 80% whenever 50% of the sites are included. Except when taking 50-60% of the sites, the support for LE was better than for KE, increasing to 80% with all the sites included. With the most diverse sites, the support for TACKLE was >80% and for LE >60%, whenever taking 20% or more of the sites (Suppl. Fig. S12).

We also investigated the effects of the presence or absence of certain taxonomic groups ('taxonomic sampling') on the phylogenetic robustness by omitting clades or groups of clades, and inferring ML phylogenies of the remaining datasets (Suppl. Table S5 and Suppl. Fig. S13). These analyses revealed that the Lokiarchaeota-Eukarya affiliation is generally robust with respect to taxonomic sampling: When Bacteria, Thaumarchaeota, Aigarchaeota, Korarchaeota, Lokiarchaeum or SAGs are removed, the support for Lokiarchaeota branching with eukaryotes was >70. When removing DPANN Archaea, the support drops (BS=64). When removing Crenarchaeota, eukaryotes group with Korarchaeota, albeit with poor support (BS=43). Finally, the removal of Korarchaeota resulted in a highly supported cluster comprised of Lokiarchaeum, Loki2, Loki3 and eukaryotes (BS=100; PP=1; Suppl. Figure S14). Further, removing Lokiarchaeum or Loki2/Loki3 yields different results: in the first case, eukaryotes branch with the remaining of the Lokiarchaeota (BS=86), but in the second case, eukaryotes group with Korarchaeota (BS=80). The latter indicates that reducing the Lokiarchaeota clade to a single lineage induces a long-branch attraction-related artefact that pulls Korarchaeum towards the eukaryotes.

Finally, to compare how well different trees explained the aligned sequence data, Approximately Unbiased (AU) tests<sup>10</sup> were performed on the concatenated alignment of 36 marker proteins. Two alternative topologies were tested against the alignment: (i) the tree resulting from the ML analysis of the 36 concatenated markers

present in Loki2/3, showing Lokiarchaeota grouping with Eukaryotes (LE) and (ii) the one resulting from the concatenation of the ribosomal protein genes only, showing Korarchaeota grouping with Lokiarchaeota (KE). The LE tree was shown to explain the data significantly better than the KE tree ( $p < 10^{-6}$ ). Hence, the AU tests supported the Lokiarchaeota-eukaryotes affiliation. We also examined single-marker gene ML trees, but topologies were often inconclusive, with low support values at critical nodes, a phenomenon that has been suggested to be due to the small amount of information contained in single-gene trees<sup>11</sup>. Nevertheless, AU tests were also performed on single-gene alignments: neither tree explained the data significantly better than the other in 30 out of 36 alignments. Out of the six alignments for which one tree explained the data significantly better ( $p < 0.01$ ), five (arCOG00412, phenylalanyl-tRNA synthetase beta subunit; arCOG01559, translation elongation factor G; arCOG01762, RNA polymerase B; arCOG04169, SecY; arCOG04256, RNA polymerase A'') supported the Lokiarchaeota-eukaryotes affiliation, and only one (arCOG04113, ribosomal protein L10AE/L16) supported the Korarchaeota-eukaryotes affiliation.

In summary, the phylogenetic analyses we have performed present strong evidence that Lokiarchaeota forms a monophyletic clade with eukaryotes. The sister relation between Korarchaeota and eukaryotes that is observed in a minority of our phylogenetic analyses most likely represents an artefact caused by the fact that Korarchaeota are only represented by a single taxon, represented by a long branch in all trees, with an unusual amino acid bias. The correct phylogenetic position of such taxa is notoriously difficult to resolve.

### 3. Bacteria-affiliated genes encoded by the Lokiarchaeum genome

The Lokiarchaeum genome was found to contain a relatively high fraction of genes that display highest similarity to genes of bacterial origin (29% of all genes). Although this high fraction seems atypical, similar observations have been made for other archaeal lineages (Fig. 2a), such as the Miscellaneous Crenarchaeal Group (MCG)<sup>12</sup> and Marine Group II archaea<sup>13</sup>. These findings seem in line with recent observations of extensive inter-domain gene exchange between Bacteria and Archaea<sup>14</sup> and are also supportive of the hypothesis that the origin of major archaeal clades coincides with profound gene acquisitions from Bacteria<sup>15</sup>. Importantly, the absence of bacterial marker genes, such as bacterial ribosomal proteins and genes involved in genetic information processing, from the Lokiarchaeum genome bin excludes the possibility that significant part of these genes originate from contaminating bacterial contigs. Rather, while the archaea-related proteins in Lokiarchaeum are assigned to COGs involved in informational processing processes including translation, transcription, replication and posttranslational modification, the lokiarchaeal proteins with highest similarity to bacterial proteins were predominantly assigned to categories related to various aspects of metabolism, signal transduction, defense mechanisms, inorganic ion and lipid transport etc. (Suppl. Figure S15). A sole exception to this pattern involves a lokiarchaeal NAD-dependent DNA ligase (LigA) encoding gene (Suppl. Table S9). This gene, however, seems to have been acquired horizontally by Lokiarchaeum as it is flanked by several genes most closely related to archaeal protein homologs. Furthermore, LigA is also encoded by the *Methanomassilicoccus alvus* genome and was suggested to have been acquired by horizontal gene transfer from Bacteria<sup>16</sup>. Altogether, the high fraction of genes with highest similarity to bacterial genes thus seems to be a genuine feature of the Lokiarchaeum genome.

#### 4. The informational processing machineries of Lokiarchaeum.

Despite of its extensive genetic repertoire concerning putative cytoskeleton, vesicular trafficking and cell division related proteins, the Lokiarchaeum composite genome revealed informational processing machineries most similar to Archaea (Suppl.-Table S9). Yet, the investigation of the ribosomal protein complement of Lokiarchaeum revealed interesting translational features. For instance, except for RPL41e, Lokiarchaeum not only contains all RPs previously found in just a subset of members of the TACK superphylum<sup>17</sup> and shared with eukaryotes (Figure 5; Suppl. Table S7 and S8), but also encodes a putative distant homolog of the eukaryotic specific RPL22, (Suppl. Figure S24). Notably, in Lokiarchaeum, three of these RPs (RPL34E, RPS14 and RPS26E) as well as the Translation initiation factor 1 (eIF-1/SUI1) (arCOG04223) appear to start with the alternative initiation codon AUU, a feature which has not been found in Archaea so far and only used by few Bacteria, including *E. coli*, to initiate transcription of *infC* (encoding IF3) and *pcnB* (encoding *E. coli* poly(A) polymerase)<sup>18</sup>. Two RPs (RPL13 and RPS26) were not part of the final Lokiarchaeum bin, but were present on several LCGC14 contigs that were binned as "Lokiarchaeum" that were not included in the final reassembly due to slightly lower coverage than required by our stringent coverage criteria. Suppl. Table S7 lists the locus tags of these RPs present on contigs binned as Lokiarchaeum and longer than 5kb. We argue that these ribosomal proteins are of lokiarchaeal origin for the following reasons: RPL13 and RPS26 are absent from bacterial genomes and solely present in some members of the TACK superphylum. The only TACK members present in our sample are closely related to the Marine Group I (Thaumarchaeota), which constitute only a minor fraction of the non-amplified LCGC14 metagenome. The RPs encoded by contigs binned as Lokiarchaeum are only distantly related to Thaumarchaeota but close homologs of these are present on several LCGC14 contigs,

which is in accordance with the expected micro-diversity of Lokiarchaeota in this sample.

The Lokiarchaeum composite genome encodes all common archaeal RNA polymerase (RPB) subunits (see Table S9, for details and redundancy), yet lacks a homolog of the small RPB8 subunit of the eukaryotic RNA polymerase (RpoG), which so far has only been found in Cren- and Korarchaeota (Fig. 5)<sup>19</sup>. Interestingly, the RPB subunits of Lokiarchaeum do not show a clear affiliation with any particular archaeal phylum (top blast hits include both Eury-, Cren- and Thaumarchaeota). In addition, while RPB subunit L does not retrieve significant matches to other sequences in nr, RPB subunit N is most similar to eukaryotic homologs. Altogether, these findings further confirm the suggestion that Lokiarchaeota comprise a distinct archaeal lineage of high taxonomic rank.

With its genes encoding DNA polymerase I of the B1-family (PolB1), a putative DNA polymerase of the inactivated B2-family (PolB2) as well as the small and large subunits of DNA polymerase D (DP2), Lokiarchaeum has a complement of replicative DNA polymerases similar to those of Thaum- and Aigarchaeota (see a recent review by Makarova *et al.* for details<sup>20</sup>). While PolB1 is absent from all euryarchaeal genomes, Crenarchaeota lack homologs of the two subunits of DP2. Instead, both Cren- and Euryarchaeota encode Polymerases I of the B3 family (PolB3), which is missing from Thaum- and Aigarchaeal genomes<sup>20</sup> and could neither be identified in Lokiarchaeum.

In contrast, the lokiarchaeal pattern of topoisomerase genes is most similar to Cren- and Euryarchaeota, rather than to Thaum- and Aigarchaeota. For instance, Lokiarchaeum encodes both the type I topoisomerase IA/III (TopoIA) as well as the type II topoisomerase IIB (TopoIIB), which introduce transient single- and double-stranded breaks into DNA, respectively<sup>21</sup>. Interestingly, subunit B of TopoIIB was

most similar to eukaryotic homologs, while TopoIIB subunit A (encoded by the flanking gene) shares highest similarity with its archaeal counterparts. In addition, we could identify a lokiarchaeal homolog of subunit B of type II topoisomerase IIA (TopoIIA) (Table S9), which is present in some members of the Euryarchaeota. However, the A subunit of topoisomerase IIA was absent from the final bin (contig break next to TopoIIA, subunit B) but seems to be present in the metagenome. Curiously, Lokiarchaeum did not seem to encode a homolog of type I topoisomerase IB (TopoIB), which is present in some TACK lineages such as Thaum- and Aigarchaeota, as well as in MCGs, and was suggested to share a common ancestry with the eukaryotic TopoIB<sup>22-24</sup>. It remains to be elucidated whether TopoIB has been present in the last common ancestor of all TACK members and was later lost in the cren- kor- and lokiarchaeal lineages (Fig. 5), whether it was acquired by some members of TACK later on, or whether its history involves a more complex evolutionary scenario.

## **5. A dynamic actin cytoskeleton and a primordial vesicular trafficking machinery in Lokiarchaeum**

An in-depth analysis of the Lokiarchaeum composite genome revealed the presence of eukaryotic-like actins as well as small proteins with gelsolin-like domains (Interpro domains IPR007122, IPR007123 and IPR029006; Suppl. Table S10). In eukaryotes, the latter domains are part of actin-binding, capping and modulating proteins such as villin, severin and adseverin, which often contain several gelsolin-domains. These proteins have been proposed to have evolved from small (120-130 amino acid) gelsolin-domain proteins<sup>25</sup>, and have so far not been detected in prokaryotic genomes. While most of the lokiarchaeal gelsolin domain proteins retrieve no close homologs in public databases, Lokiarch\_14340 and Lokiarch\_49620 for instance display



significant homology to eukaryotic gelsolins/adseverins (E-value to top Blast hit:  $1 \times 10^{-101}$ , 24% identity) and Lokiarch\_42060 was most similar to actin-binding proteins of *Entamoeba* (E-value:  $6 \times 10^{-59}$ ; 27% identity) after the second Psiblast iteration using an inclusion threshold of 0.001). The presence of these gelsolin-domain proteins in an archaeon opens up the possibility that the archaeal ancestor of eukaryotes already contained a machinery to actively remodel its actin cytoskeleton. Despite of the presence of genes suggestive of a dynamic actin cytoskeleton, we could not identify homologs of eukaryotic or archaeal tubulins in the Lokiarchaeum composite genome, apart from a homolog of the canonical FtsZ proteins (Fig. 5, Suppl. Table S9).

In addition to the cytoskeletal elements mentioned above, Lokiarchaeum contains subunits of all components of the eukaryotic endosomal sorting complexes ESCRT-I, ESCRT-II and ESCRT-III (Extended Data Table 1; Suppl. Table S6). Thus far, only distant homologs of SNF7 (a subunit of the eukaryotic ESCRT-III complex) have been identified in several TACK lineages, while genes encoding ESCRT-related proteins are notably absent from bacterial genomes. While the homology of the lokiarchaeal ESCRT-II with eukaryotic EAP30-domain-containing proteins (Vps36/22) and Vps25 could easily be established (Fig. 4a; Suppl. Figs. S21-S22), sequence homology of the putative lokiarchaeal ESCRT-I subunit Vps28 to putative eukaryotic counterparts was low. Yet, we could successfully model the C-terminal domain of the Lokiarchaeum protein to Vps28 (>90% confidence for 40% of the residues; homology confidence 95.7%; also see Suppl. Fig S23). In addition to the lokiarchaeal ESCRT-I protein Vps28, we identified a gene encoding a low complexity coiled coil protein (Lokiarch\_16740) that showed low (insignificant) similarity to a Steadiness domain (IPR017916) at its C-terminus (Suppl. Table S6 + S10). Interestingly, this gene is located in close proximity to a gene encoding a putative Vps20/32/60-type ESCRT-III subunit (Lokiarch\_16760) in the Lokiarchaeum

genome. Although the insignificant homology prevents us from drawing firm conclusions, the product of this gene could represent a functional homolog of the Steadiness box of eukaryotic ESCRT-I subunit Vps23, which is implicated in the assembly of the ESCRT-I complex in eukaryotes<sup>26</sup>.

## 6. References

- 1 Philippe, H., Zhou, Y., Brinkmann, H., Rodrigue, N. & Delsuc, F. Heterotachy and long-branch attraction in phylogenetics. *BMC evolutionary biology* **5**, doi:10.1186/1471-2148-5-50 (2005).
- 2 Foster, P. G. Modeling compositional heterogeneity. *Systematic biology* **53**, 485-495 (2004).
- 3 Lartillot, N., Rodrigue, N., Stubbs, D. & Richer, J. PhyloBayes MPI: phylogenetic reconstruction with infinite mixtures of profiles in a parallel environment. *Systematic biology* **62**, 611-615, doi:10.1093/sysbio/syt022 (2013).
- 4 Cox, C. J., Foster, P. G., Hirt, R. P., Harris, S. R. & Embley, T. M. The archaeobacterial origin of eukaryotes. *Proc Natl Acad Sci U S A* **105**, 20356-20361, doi:10.1073/pnas.0810647105 (2008).
- 5 Lartillot, N., Brinkmann, H. & Philippe, H. Suppression of long-branch attraction artefacts in the animal phylogeny using a site-heterogeneous model. *BMC evolutionary biology* **7 Suppl 1**, S4, doi:10.1186/1471-2148-7-S1-S4 (2007).
- 6 Brochier, C., Gribaldo, S., Zivanovic, Y., Confalonieri, F. & Forterre, P. Nanoarchaea: representatives of a novel archaeal phylum or a fast-evolving

- euryarchaeal lineage related to Thermococcales? *Genome biology* **6**, doi:10.1186/gb-2005-6-5-r42 (2005).
- 7 Guy, L., Spang, A., Saw, J. H. & Ettema, T. J. 'Geoarchaeote NAG1' is a deeply rooting lineage of the archaeal order Thermoproteales rather than a new phylum. *The ISME journal* **8**, 1353-1357, doi:10.1038/ismej.2014.6 (2014).
- 8 Guy, L., Saw, J. H. & Ettema, T. J. The Archaeal Legacy of Eukaryotes: A Phylogenomic Perspective. *Cold Spring Harbor perspectives in biology*, doi:10.1101/cshperspect.a016022 (2014).
- 9 Viklund, J., Ettema, T. J. & Andersson, S. G. Independent genome reduction and phylogenetic reclassification of the oceanic SAR11 clade. *Molecular biology and evolution* **29**, 599-615, doi:10.1093/molbev/msr203 (2012).
- 10 Shimodaira, H. An approximately unbiased test of phylogenetic tree selection. *Systematic biology* **51**, 492-508, doi:10.1080/10635150290069913 (2002).
- 11 Thiergart, T., Landan, G. & Martin, W. F. Concatenated alignments and the case of the disappearing tree. *BMC evolutionary biology* **14**, 2624, doi:10.1186/s12862-014-0266-0 (2014).
- 12 Lloyd, K. G. *et al.* Predominant archaea in marine sediments degrade detrital proteins. *Nature* **496**, 215-218, doi:10.1038/nature12033 (2013).
- 13 Iverson, V. *et al.* Untangling genomes from metagenomes: revealing an uncultured class of marine Euryarchaeota. *Science* **335**, 587-590, doi:10.1126/science.1212665 (2012).
- 14 Deschamps, P., Zivanovic, Y., Moreira, D., Rodriguez-Valera, F. & Lopez-Garcia, P. Pangenome evidence for extensive interdomain horizontal transfer affecting lineage core and shell genes in uncultured planktonic

- thaumarchaeota and euryarchaeota. *Genome biology and evolution* **6**, 1549-1563, doi:10.1093/gbe/evu127 (2014).
- 15 Nelson-Sathi, S. *et al.* Origins of major archaeal clades correspond to gene acquisitions from bacteria. *Nature* **517**, 77-80, doi:10.1038/nature13805 (2015).
- 16 Borrel, G. *et al.* Unique characteristics of the pyrrolysine system in the 7th order of methanogens: implications for the evolution of a genetic code expansion cassette. *Archaea* **2014**, 374146, doi:10.1155/2014/374146 (2014).
- 17 Yutin, N., Puigbo, P., Koonin, E. V. & Wolf, Y. I. Phylogenomics of prokaryotic ribosomal proteins. *PloS one* **7**, e36972, doi:10.1371/journal.pone.0036972 (2012).
- 18 Laursen, B. S., Sorensen, H. P., Mortensen, K. K. & Sperling-Petersen, H. U. Initiation of protein synthesis in bacteria. *Microbiology and molecular biology reviews : MMBR* **69**, 101-123, doi:10.1128/MMBR.69.1.101-123.2005 (2005).
- 19 Koonin, E. V., Makarova, K. S. & Elkins, J. G. Orthologs of the small RPB8 subunit of the eukaryotic RNA polymerases are conserved in hyperthermophilic Crenarchaeota and "Korarchaeota". *Biology direct* **2**, 38, doi:10.1186/1745-6150-2-38 (2007).
- 20 Makarova, K. S., Krupovic, M. & Koonin, E. V. Evolution of replicative DNA polymerases in archaea and their contributions to the eukaryotic replication machinery. *Frontiers in microbiology* **5**, 354, doi:10.3389/fmicb.2014.00354 (2014).
- 21 Forterre, P. & Gabelle, D. Phylogenomics of DNA topoisomerases: their origin and putative roles in the emergence of modern organisms. *Nucleic acids research* **37**, 679-692, doi:10.1093/nar/gkp032 (2009).

- 22 Brochier-Armanet, C., Gribaldo, S. & Forterre, P. A DNA topoisomerase IB in Thaumarchaeota testifies for the presence of this enzyme in the last common ancestor of Archaea and Eucarya. *Biology direct* **3**, 54, doi:10.1186/1745-6150-3-54 (2008).
- 23 Meng, J. *et al.* Genetic and functional properties of uncultivated MCG archaea assessed by metagenome and gene expression analyses. *The ISME journal* **8**, 650-659, doi:10.1038/ismej.2013.174 (2014).
- 24 Nunoura, T. *et al.* Insights into the evolution of Archaea and eukaryotic protein modifier systems revealed by the genome of a novel archaeal group. *Nucleic acids research* **39**, 3204-3223, doi:10.1093/nar/gkq1228 (2011).
- 25 Way, M. & Weeds, A. Nucleotide sequence of pig plasma gelsolin. Comparison of protein sequence with human gelsolin and other actin-severing proteins shows strong homologies and evidence for large internal repeats. *Journal of molecular biology* **203**, 1127-1133 (1988).
- 26 Kostelansky, M. S. *et al.* Structural and functional organization of the ESCRT-I trafficking complex. *Cell* **125**, 113-126, doi:10.1016/j.cell.2006.01.049 (2006).

**Suppl. Table S1:** General characteristics of the LCGC14 and LCGC14AMP metagenomic datasets.

|                                            | LCGC14AMP | LCGC14  |
|--------------------------------------------|-----------|---------|
| Raw data (Gb)                              | 56.6      | 8.6     |
| Reads after preprocessing ( $\cdot 10^6$ ) | 188.2     | 53      |
| Contigs > 1 kb                             | 289,831   | 70,510  |
| Total assembly size (contigs > 1kb) (Mb)   | 724.5     | 227.4   |
| N50 (bp)                                   | 2895      | 4690    |
| CDS                                        | 1,070,063 | 315,060 |
| SSU rRNA genes                             | 6         | 25      |

**Suppl. Table S2:** Description of arCOG markers used in concatenated phylogenies.

| arCOG      | Lokiarchaeum | Loki2/3 | RP/non-RP | COG      | Description                                                                                                |
|------------|--------------|---------|-----------|----------|------------------------------------------------------------------------------------------------------------|
| arCOG00109 | x            |         |           | COG02890 | Methylase of polypeptide chain release factors                                                             |
| arCOG00405 | x            |         |           | COG00423 | Glycyl-tRNA synthetase (class II)                                                                          |
| arCOG00412 | x            | x       |           | COG00072 | Phenylalanyl-tRNA synthetase beta subunit                                                                  |
| arCOG00415 | x            | x       |           | COG00468 | RecA/RadA recombinase                                                                                      |
| arCOG00779 | x            |         | x         | COG00200 | Ribosomal protein L15                                                                                      |
| arCOG00785 | x            | x       | x         | COG00255 | Ribosomal protein L29                                                                                      |
| arCOG00987 | x            | x       |           | COG00130 | Pseudouridine synthase                                                                                     |
| arCOG01001 | x            |         |           | COG00024 | Methionine aminopeptidase                                                                                  |
| arCOG01179 | x            |         |           | COG00361 | Translation initiation factor 1 (IF-1)                                                                     |
| arCOG01183 | x            | x       |           | COG00533 | Subunit of KEOPS complex, contains a domain with ASKHA fold and RIO-type kinase (AP-endonuclease activity) |
| arCOG01227 | x            | x       |           | COG00552 | Signal recognition particle GTPase                                                                         |
| arCOG01228 | x            | x       |           | COG00541 | Signal recognition particle GTPase                                                                         |
| arCOG01358 | x            |         |           | COG00621 | 2-methylthioadenine synthetase                                                                             |
| arCOG01559 | x            | x       |           | COG00480 | Translation elongation factor G, EF-G (GTPase)                                                             |
| arCOG01560 | x            | x       |           | COG00532 | Translation initiation factor 2 (IF-2; GTPase)                                                             |
| arCOG01704 | x            |         |           | COG00452 | Phosphopantothenoylcysteine synthetase/decarboxylase                                                       |
| arCOG01722 | x            | x       | x         | COG00099 | Ribosomal protein S13                                                                                      |
| arCOG01758 | x            | x       | x         | COG00051 | Ribosomal protein S10                                                                                      |
| arCOG01762 | x            | x       |           | COG00085 | DNA-directed RNA polymerase subunit B                                                                      |
| arCOG04050 | x            |         |           | COG00258 | 5'-3' exonuclease (including N-terminal domain of Poll)                                                    |
| arCOG04064 | x            | x       |           | COG00750 | Predicted membrane-associated Zn-dependent protease                                                        |
| arCOG04067 | x            |         | x         | COG00090 | Ribosomal protein L2                                                                                       |
| arCOG04070 | x            |         | x         | COG00087 | Ribosomal protein L3                                                                                       |
| arCOG04071 | x            |         | x         | COG00088 | Ribosomal protein L4                                                                                       |
| arCOG04072 | x            |         | x         | COG00089 | Ribosomal protein L23                                                                                      |
| arCOG04086 | x            |         | x         | COG01841 | Ribosomal protein L30                                                                                      |
| arCOG04087 | x            |         | x         | COG00098 | Ribosomal protein S5                                                                                       |
| arCOG04088 | x            |         | x         | COG00256 | Ribosomal protein L18                                                                                      |
| arCOG04090 | x            | x       | x         | COG00097 | Ribosomal protein L6P                                                                                      |
| arCOG04091 | x            | x       | x         | COG00096 | Ribosomal protein S8                                                                                       |
| arCOG04092 | x            | x       | x         | COG00094 | Ribosomal protein L5                                                                                       |
| arCOG04094 | x            | x       | x         | COG00198 | Ribosomal protein L24                                                                                      |
| arCOG04095 | x            | x       | x         | COG00093 | Ribosomal protein L14                                                                                      |
| arCOG04096 | x            | x       | x         | COG00186 | Ribosomal protein S17                                                                                      |
| arCOG04097 | x            | x       | x         | COG00092 | Ribosomal protein S3                                                                                       |
| arCOG04098 | x            | x       | x         | COG00091 | Ribosomal protein L22                                                                                      |
| arCOG04099 | x            | x       | x         | COG00185 | Ribosomal protein S19                                                                                      |
| arCOG04113 | x            | x       | x         | COG00197 | Ribosomal protein L10AE/L16                                                                                |
| arCOG04121 | x            | x       |           | COG00164 | Ribonuclease HII                                                                                           |

|            |   |   |   |          |                                                                                  |
|------------|---|---|---|----------|----------------------------------------------------------------------------------|
| arCOG04131 | x |   |   | COG00030 | Dimethyladenosine transferase (rRNA methylation)                                 |
| arCOG04169 | x | x |   | COG00201 | Preprotein translocase subunit SecY                                              |
| arCOG04184 | x |   |   | COG00127 | Xanthosine triphosphate pyrophosphatase                                          |
| arCOG04185 | x |   | x | COG00184 | Ribosomal protein S15P                                                           |
| arCOG04239 | x | x | x | COG00522 | Ribosomal protein S4 or related protein                                          |
| arCOG04240 | x | x | x | COG00100 | Ribosomal protein S11                                                            |
| arCOG04241 | x | x |   | COG00202 | DNA-directed RNA polymerase subunit D                                            |
| arCOG04242 | x | x | x | COG00102 | Ribosomal protein L13                                                            |
| arCOG04243 | x | x | x | COG00103 | Ribosomal protein S9                                                             |
| arCOG04245 | x | x | x | COG00052 | Ribosomal protein S2                                                             |
| arCOG04254 | x | x | x | COG00049 | Ribosomal protein S7                                                             |
| arCOG04255 | x | x | x | COG00048 | Ribosomal protein S12                                                            |
| arCOG04256 | x | x |   | COG00086 | DNA-directed RNA polymerase subunit A double prime                               |
| arCOG04257 | x | x |   | COG00086 | DNA-directed RNA polymerase subunit A prime                                      |
| arCOG04277 | x |   |   | COG00231 | Translation elongation factor P (EF-P)/translation initiation factor 5A (eIF-5A) |
| arCOG04288 | x |   | x | COG00244 | Ribosomal protein L10                                                            |
| arCOG04289 | x | x | x | COG00081 | Ribosomal protein L1                                                             |
| arCOG04302 | x |   |   | COG00008 | Glutamyl- or glutamyl-tRNA synthetase                                            |
| arCOG04372 | x |   | x | COG00080 | Ribosomal protein L11                                                            |



Suppl. Table S3: Genomes used in arCOG attribution and in phylogenies.

| Short name                                                                                              | Full name                                              | NCBI Taxid | Accession          | Group   | SAG | Phylogenies |
|---------------------------------------------------------------------------------------------------------|--------------------------------------------------------|------------|--------------------|---------|-----|-------------|
| <i>Novel archaea (44 in total, 23 selected for phylogenies):</i>                                        |                                                        |            |                    |         |     |             |
| Ca_Micrarchaeum_acidophilum_A                                                                           | Candidatus Micrarchaeum acidophilum ARMAN-2            | 425595     | ACVJ01000001-8.1   | arman   | no  | yes         |
| Ca_Parvarchaeum_acidophilum_A                                                                           | Candidatus Parvarchaeum acidophilum ARMAN-4            | 662760     | ADCE01000001-45.1  | arman   | no  | no          |
| Ca_Parvarchaeum_acidophilus_A                                                                           | Candidatus Parvarchaeum acidophilus ARMAN-5            | 662762     | ADHF01000001-73.1  | arman   | no  | yes         |
| Ca_Nitrososphaera_gargensis_G                                                                           | Candidatus Nitrososphaera gargensis Ga9.2              | 1237085    | NC_018719.1        | thaum   | no  | yes         |
| Uncultured_Marine_Group_II_Eu                                                                           | Uncultured Marine Group-II Euryarchaeote               | 274854     | CM001443.1         | eury    | no  | yes         |
| Fervidicoccus_fontis_Kam940                                                                             | Fervidicoccus fontis Kam940                            | 1163730    | NC_017461.1        | cren    | no  | yes         |
| Ca_Nanosalina_sp_J07AB43                                                                                | Candidatus Nanosalina sp J07AB43                       | 889948     | AEIY01000001-210.1 | eury    | no  | yes         |
| Ca_Nanosalinarum_sp_J07AB56                                                                             | Candidatus Nanosalinarum sp J07AB56                    | 889962     | AEIX01000001-259.1 | eury    | no  | yes         |
| Geo_NAG1                                                                                                | Geoarchaeote NAG1                                      | 1448933    | JGI:2504756013*    | cren    | no  | yes         |
| MCG_SCGC_AB539E09                                                                                       | Thaumarchaeota archaeon SCGC AB-539-E09                | 1198115    | NZ_ALXK00000000.1  | MCG     | yes | yes         |
| MBGD_SCGC_AB539N05                                                                                      | Thermoplasmatales archaeon SCGC AB-539-N05             | 1198116    | NZ_ALXL00000000.1  | eury    | yes | yes**       |
| MBGD_SCGC_AB539C06                                                                                      | Thermoplasmatales archaeon SCGC AB-539-C06             | 1242690    | NZ_AOSH00000000.1  | eury    | yes | no**        |
| MBGD_SCGC_AB540F20                                                                                      | Thermoplasmatales archaeon SCGC AB-540-F20             | 1242866    | NZ_AOSI00000000.1  | eury    | yes | no**        |
| Nanoarchaeote_Nst1                                                                                      | Nanoarchaeote Nst1                                     | 1294122    | NZ_APJZ00000000.1  | nano    | yes | yes         |
| Methanomassiliicoccus_lu_B10                                                                            | Methanomassiliicoccus luminyensis B10                  | 1175296    | NZ_CAJE00000000.1  | eury    | no  | yes         |
| Aenigma_AAA011_F07                                                                                      | Aenigmarchaeota archaeon SCGC AAA011-F07               | 1046938    | AQYU00000000.1     | aenigma | yes | no***       |
| Aenigma_AAA011_O16                                                                                      | Candidatus Aenigmarchaeum subterraneum SCGC AAA011-O16 | 743730     | ASMQ00000000.1     | aenigma | yes | yes***      |
| Aenigma_0000106_F11                                                                                     | Aenigmarchaeota archaeon JGI 0000106-F11               | 1130284    | ASMO00000000.1     | aenigma | yes | no***       |
| Aiga_AAA471_F17                                                                                         | Aigarchaeota archaeon SCGC AAA471-F17                  | 1052829    | ASPD00000000.1     | aiga    | yes | yes         |
| Aiga_AAA471_G05                                                                                         | Aigarchaeota archaeon SCGC AAA471-G05                  | 1052830    | ASLV00000000.1     | aiga    | yes | yes         |
| Aiga_0000106_J15                                                                                        | Aigarchaeota archaeon JGI 0000106-J15                  | 1130285    | ASPF00000000.1     | aiga    | yes | yes         |
| Diapher_AAA011_K09                                                                                      | Diapherotrites archaeon SCGC AAA011-K09                | 1104575    | ASMR00000000.1     | diapher | yes | no          |
| Diapher_AAA011_E11                                                                                      | Candidatus Iainarchaeum andersonii SCGC AAA011-E11     | 1104576    | AQRS00000000.1     | diapher | yes | yes         |
| Diapher_AAA011_N19                                                                                      | Diapherotrites archaeon SCGC AAA011-N19                | 743731     | ASMS00000000.1     | diapher | yes | no          |
| Eury_AAA252_I15                                                                                         | Euryarchaeota archaeon SCGC AAA252-I15                 | 913322     | AQSC00000000.1     | eury    | yes | yes         |
| Geo_AAA471_B05                                                                                          | Crenarchaeota archaeon SCGC AAA471-B05                 | 1052801    | AQYM00000000.1     | cren    | yes | yes         |
| Geo_AAA471_B23                                                                                          | Crenarchaeota archaeon SCGC AAA471-B23                 | 1052802    | ASPO00000000.1     | cren    | yes | no          |
| Geo_AAA471_C03                                                                                          | Crenarchaeota archaeon SCGC AAA471-C03                 | 1052803    | AQTC00000000.1     | cren    | yes | no          |
| Geo_AAA471_L13                                                                                          | Crenarchaeota archaeon SCGC AAA471-L13                 | 1052804    | AQSU00000000.1     | cren    | yes | no          |
| Geo_AAA471_L14                                                                                          | Crenarchaeota archaeon SCGC AAA471-L14                 | 1052805    | ASMI00000000.1     | cren    | yes | no          |
| Geo_AAA471_O08                                                                                          | Crenarchaeota archaeon SCGC AAA471-O08                 | 1052806    | ASMJ00000000.1     | cren    | yes | no          |
| Nano_AAA011_D5                                                                                          | Nanoarchaeota archaeon SCGC AAA011-D5                  | 743729     | ASMP00000000.1     | nano    | yes | yes         |
| Nano_AAA011_G17                                                                                         | Nanoarchaeota archaeon SCGC AAA011-G17                 | 1104577    | AQRL00000000.1     | nano    | yes | yes         |
| Thaum_AAA007_O23                                                                                        | Thaumarchaeota archaeon SCGC AAA007-O23                | 913333     | ARW00000000.1      | thaum   | yes | yes         |
| Thaum_AB_179_E04                                                                                        | Thaumarchaeota archaeon SCGC AB-179-E04                | 1104571    | ASPK00000000.1     | thaum   | yes | yes         |
| Ca_Haloredivivus_sp_G17                                                                                 | Candidatus Haloredivivus sp. G17                       | 1072681    | AGNT00000000.1     | eury    | yes | no          |
| SCGC_AAA261C22                                                                                          | Crenarchaeote SCGC AAA261-C22                          | 1130299    | AQVF00000000.1     | cren    | yes | no          |
| SCGC_AAA261F05                                                                                          | Crenarchaeote SCGC AAA261-F05                          | 1130300    | AQVG00000000.1     | cren    | yes | no          |
| SCGC_AAA261G18                                                                                          | Crenarchaeote SCGC AAA261-G18                          | 1130301    | AQVH00000000.1     | cren    | yes | no          |
| SCGC_AAA261L14                                                                                          | Crenarchaeote SCGC AAA261-L14                          | 1130302    | AQVI00000000.1     | cren    | yes | no          |
| SCGC_AAA261N13                                                                                          | Crenarchaeote SCGC AAA261-N13                          | 1130304    | AQVJ00000000.1     | cren    | yes | no          |
| SCGC_AAA261E04                                                                                          | Euryarchaeote SCGC AAA261-E04                          | 1130317    | AQVK00000000.1     | eury    | yes | no          |
| SCGC_AAA261G15                                                                                          | Euryarchaeote SCGC AAA261-G15                          | 1130318    | AQVL00000000.1     | eury    | yes | no          |
| SCGC_AAA261L22                                                                                          | Crenarchaeote SCGC AAA261-L22                          | 1130303    | AQVP00000000.1     | cren    | yes | no          |
| SCGC_AAA261N23                                                                                          | Crenarchaeote SCGC AAA261-N23                          | 1130305    | AQVQ00000000.1     | cren    | yes | no          |
| <i>Selected from Yutin et al (2012) (58 archaea, only the ones selected for phylogenies are shown):</i> |                                                        |            |                    |         |     |             |
| Methanohalobium_evestigatum_Z                                                                           | Methanohalobium evestigatum Z-7303                     | 644295     | 49857              | eury    | no  | yes         |
| Methanosarcina_acetivorans_C2                                                                           | Methanosarcina acetivorans C2A                         | 188937     | 57879              | eury    | no  | yes         |
| Methanosaeta_thermophila_PT                                                                             | Methanosaeta thermophila PT                            | 349307     | 58469              | eury    | no  | yes         |
| Methanocella_paludicola_SANAE                                                                           | Methanocella paludicola SANAE                          | 304371     | 42887              | eury    | no  | yes         |
| Methanosphaerula_palustris_E1                                                                           | Methanosphaerula palustris E1-9c                       | 521011     | 59193              | eury    | no  | yes         |
| Methanospirillum_hungatei_JF                                                                            | Methanospirillum hungatei JF-1                         | 323259     | 58181              | eury    | no  | yes         |
| Methanoplanus_petrolearius_DS                                                                           | Methanoplanus petrolearius DSM 11571                   | 679926     | 52695              | eury    | no  | yes         |
| Methanoculleus_marisnigri_JR1                                                                           | Methanoculleus marisnigri JR1                          | 368407     | 58561              | eury    | no  | yes         |
| Methanocorpusculum_labreanum                                                                            | Methanocorpusculum labreanum Z                         | 410358     | 58785              | eury    | no  | yes         |
| Haloarcula_marismortui_ATCC_4                                                                           | Haloarcula marismortui ATCC 43049                      | 272569     | 57719              | eury    | no  | yes         |
| Halalkalicoccus_jeotgali_B3                                                                             | Halalkalicoccus jeotgali B3                            | 795797     | 50305              | eury    | no  | yes         |
| Haloferax_volcanii_DS2                                                                                  | Haloferax volcanii DS2                                 | 309800     | 46845              | eury    | no  | yes         |
| Halobacterium_NRC_1                                                                                     | Halobacterium sp. NRC-1                                | 64091      | 57769              | eury    | no  | yes         |
| Archaeoglobus_fulgidus_DSM_43                                                                           | Archaeoglobus fulgidus DSM 4304                        | 224325     | 57717              | eury    | no  | yes         |
| Ferroglobus_placidus_DSM_1064                                                                           | Ferroglobus placidus DSM 10642                         | 589924     | 40863              | eury    | no  | yes         |
| Thermoplasma_acidophilum_DSM                                                                            | Thermoplasma acidophilum DSM 1728                      | 273075     | 61573              | eury    | no  | yes         |
| Ferroplasma_acidarmanus_fer1                                                                            | Ferroplasma acidarmanus fer1                           | 333146     | 54095              | eury    | no  | yes         |
| Picrophilus_torridus_DSM_9790                                                                           | Picrophilus torridus DSM 9790                          | 263820     | 58041              | eury    | no  | yes         |
| Aciduliprofundum_boonei_T469                                                                            | Aciduliprofundum boonei T469                           | 439481     | 43333              | eury    | no  | yes         |
| Methanococcus_maripaludis_C6                                                                            | Methanococcus maripaludis C6                           | 444158     | 58947              | eury    | no  | yes         |
| Methanotorrus_igneus_Kol_5                                                                              | Methanotorrus igneus Kol 5                             | 880724     | 67321              | eury    | no  | yes         |
| Methanocaldococcus_jannaschii                                                                           | Methanocaldococcus jannaschii DSM 2661                 | 243232     | 57713              | eury    | no  | yes         |
| Methanobacterium_AL_21                                                                                  | Methanobacterium AL 21                                 | 868132     | 63623              | eury    | no  | yes         |
| Methanosphaera_stadtmanae_DSM                                                                           | Methanosphaera stadtmanae DSM 3091                     | 339860     | 58407              | eury    | no  | yes         |
| Methanothermobacter_thermauto                                                                           | Methanothermobacter thermotrophicus Delta H            | 187420     | 57877              | eury    | no  | yes         |
| Methanothermus_fervidus_DSM_2                                                                           | Methanothermus fervidus DSM 2088                       | 523846     | 60167              | eury    | no  | yes         |
| Methanopyrus_kandleri_AV19                                                                              | Methanopyrus kandleri AV19                             | 190192     | 57883              | eury    | no  | yes         |
| Pyrococcus_furiosus_DSM_3638                                                                            | Pyrococcus furiosus DSM 3638                           | 186497     | 57873              | eury    | no  | yes         |
| Thermococcus_kodakarensis_KOD1                                                                          | Thermococcus kodakarensis KOD1                         | 69014      | 58225              | eury    | no  | yes         |
| Nanoarchaeum_equitans_Kin4_M                                                                            | Nanoarchaeum equitans Kin4-M                           | 228908     | 58009              | nano    | no  | yes         |
| Sulfolobus_islandicus_M_16_4                                                                            | Sulfolobus islandicus M.16.4                           | 426118     | 58841              | cren    | no  | yes         |
| Sulfolobus_solfataricus_P2                                                                              | Sulfolobus solfataricus P2                             | 273057     | 57721              | cren    | no  | yes         |

|                               |                                             |         |       |       |    |     |
|-------------------------------|---------------------------------------------|---------|-------|-------|----|-----|
| Metallosphaera_cuprina_Ar_4   | Metallosphaera cuprina Ar-4                 | 1006006 | 66329 | cren  | no | yes |
| Metallosphaera_sedula_DSM_534 | Metallosphaera sedula DSM 5348              | 399549  | 58717 | cren  | no | yes |
| Acidianus_hospitalis_W1       | Acidianus hospitalis W1                     | 933801  | 66875 | cren  | no | yes |
| Sulfolobus_acidocaldarius_DSM | Sulfolobus acidocaldarius DSM 639           | 330779  | 58379 | cren  | no | yes |
| Sulfolobus_tokodaii_7         | Sulfolobus tokodaii 7                       | 273063  | 57807 | cren  | no | yes |
| Desulfurococcus_kamchatkensis | Desulfurococcus kamchatkensis 1221n         | 490899  | 59133 | cren  | no | yes |
| Thermosphaera_aggregans_DSM_1 | Thermosphaera aggregans DSM 11486           | 633148  | 48993 | cren  | no | yes |
| Staphylothermus_marinus_F1    | Staphylothermus marinus F1                  | 399550  | 58719 | cren  | no | yes |
| Acidilobus_saccharovorans_345 | Acidilobus saccharovorans 345-15            | 666510  | 51395 | cren  | no | yes |
| Aeropyrum_pernix_K1           | Aeropyrum pernix K1                         | 272557  | 57757 | cren  | no | yes |
| Ignicoccus_hospitalis_KIN4_I  | Ignicoccus hospitalis KIN4/I                | 453591  | 58365 | cren  | no | yes |
| Hyperthermus_butylicus_DSM_54 | Hyperthermus butylicus DSM 5456             | 415426  | 57755 | cren  | no | yes |
| Pyrolobus_fumarum_1A          | Pyrolobus fumarum 1A                        | 694429  | 73415 | cren  | no | yes |
| Ignisphaera_aggregans_DSM_172 | Ignisphaera aggregans DSM 17230             | 583356  | 51875 | cren  | no | yes |
| Pyrobaculum_aerophilum_IM2    | Pyrobaculum aerophilum IM2                  | 178306  | 57727 | cren  | no | yes |
| Pyrobaculum_calidifontis_JCM  | Pyrobaculum calidifontis JCM 11548          | 410359  | 58787 | cren  | no | yes |
| Thermoproteus_uzoniensis_768  | Thermoproteus uzoniensis 768-20             | 999630  | 65089 | cren  | no | yes |
| Vulcanisaeta_distributa_DSM_1 | Vulcanisaeta distributa DSM 14429           | 572478  | 52827 | cren  | no | yes |
| Caldivirga_maquilingensis_IC  | Caldivirga maquilingensis IC-167            | 397948  | 58711 | cren  | no | yes |
| Thermofilum_pendens_Hrk_5     | Thermofilum pendens Hrk 5                   | 368408  | 58563 | cren  | no | yes |
| Nitrosoarchaeum_koreensis_MY1 | Candidatus Nitrosoarchaeum koreensis MY1    | 1001994 | 67913 | thaum | no | yes |
| Nitrosoarchaeum_limnia_SFB1   | Candidatus Nitrosoarchaeum limnia SFB1      | 886738  | 66129 | thaum | no | yes |
| Nitrosopumilus_maritimus_SCM1 | Nitrosopumilus maritimus SCM1               | 436308  | 58903 | thaum | no | yes |
| Cenarchaeum_symbiosum_A       | Cenarchaeum symbiosum A                     | 414004  | 61411 | thaum | no | yes |
| Caldiarchaeum_subterraneum    | Candidatus Caldiarchaeum subterraneum       | 311458  | 49157 | aiga  | no | yes |
| Ca_Korarchaeum_cryptofilum_OP | Candidatus Korarchaeum cryptofilum OPF8     | 374847  | 58601 | kor   | no | yes |
| <b>Bacteria (10)</b>          |                                             |         |       |       |    |     |
| Bacillus_subtilis_168         | Bacillus subtilis 168                       | 224308  | 57675 | bact  |    | yes |
| Bacteroides_thetaiotaomicron  | Bacteroides thetaiotaomicron VPI 5482       | 226186  | 62913 | bact  |    | yes |
| Borrelia_burgdorferi_B31      | Borrelia burgdorferi B31                    | 224326  | 57581 | bact  |    | yes |
| Campylobacter_jejuni_NCTC_111 | Campylobacter jejuni NCTC 11168 ATCC 700819 | 192222  | 57587 | bact  |    | yes |
| Chlamydia_trachomatis_D_UW_3  | Chlamydia trachomatis D UW 3 CX             | 272561  | 57637 | bact  |    | yes |
| Escherichia_coli_K_12_substr  | Escherichia coli K 12 substr. MG1655        | 511145  | 57779 | bact  |    | yes |
| Rhodopirellula_baltica_SH_1   | Rhodopirellula baltica SH 1                 | 243090  | 61589 | bact  |    | yes |
| Rickettsia_prowazekii_Madrid  | Rickettsia prowazekii Madrid E              | 272947  | 61565 | bact  |    | yes |
| Synechocystis_PCC_6803        | Synechocystis PCC 6803                      | 1148    | 57659 | bact  |    | yes |
| Thermotoga_maritima_MSB8      | Thermotoga maritima MSB8                    | 243274  | 57723 | bact  |    | yes |
| <b>Eukarya (10)</b>           |                                             |         |       |       |    |     |
| Arabidopsis_thaliana          | Arabidopsis thaliana                        | 3702    |       | euk   |    | yes |
| Dictyostelium_discoideum      | Dictyostelium discoideum                    | 44689   |       | euk   |    | yes |
| Entamoeba_histolytica_HM_1_IM | Entamoeba histolytica HM-1:IMSS             | 294381  |       | euk   |    | yes |
| Homo_sapiens                  | Homo sapiens                                | 9606    |       | euk   |    | yes |
| Leishmania_infantum           | Leishmania infantum                         | 5671    |       | euk   |    | yes |
| Plasmodium_falciparum         | Plasmodium falciparum                       | 5833    |       | euk   |    | yes |
| Saccharomyces_cerevisiae      | Saccharomyces cerevisiae                    | 4932    |       | euk   |    | yes |
| Tetrahymena_thermophila       | Tetrahymena thermophila                     | 5911    |       | euk   |    | yes |
| Thalassiosira_pseudonana_CCMP | Thalassiosira pseudonana CCMP 1335          | 35128   |       | euk   |    | yes |
| Trichomonas_vaginalis         | Trichomonas vaginalis                       | 5722    |       | euk   |    | yes |

\*: Sequences for NAG1 are not deposited at NCBI. Here, the accession corresponds to JGI's taxon ID.

\*\*/\*\*: These two groups of three genomes were pooled: paralog from the one marked with 'yes' was used whenever possible, complemented with those marked with 'no' elsewhere

**Suppl. Table S4:** General characteristics of the Lokiarchaeum assembly.

|                                                  | Lokiarchaeum |
|--------------------------------------------------|--------------|
| Raw data (Mb)                                    | 423.7        |
| Reads after preprocessing                        | 1,532,941    |
| Contigs, length $\geq 1$ kb, coverage $\geq 20X$ | 504          |
| Assembly (filtered contigs) (Mb)                 | 5.143        |
| N50 (bp)                                         | 15403        |
| N90 (bp)                                         | 5061         |
| Completeness, weighted                           | 0.919        |
| Redundancy, weighted                             | 1.438        |
| GC content (%)                                   | 31.1         |
| CDS                                              | 5381         |
| SSU/LSU rRNA genes                               | 1/1          |
| tRNA genes (tRNAscan-SE/SPLITSX)                 | 22/26        |

**Suppl. Table S5:** Results of the taxon removal phylogenetic analyses.

| Removed taxon            | Sister clade to Eukarya | Bootstrap Support | TACKLE <sup>1</sup> topology | Panel in Suppl. Fig. S13 |
|--------------------------|-------------------------|-------------------|------------------------------|--------------------------|
| Lokiarchaeum             | Loki2/3                 | 86                | K,(LE,(TA,C))                | a                        |
| Loki2/Loki3              | K                       | 80                | L,(KE,(TA,C))                | b                        |
| Lokiarchaeum/Loki2/Loki3 | K                       | 99                | KE,(TA,C))                   | c                        |
| Bacteria                 | L                       | 75                | LE,(K,(TA,C))                | d                        |
| Eukarya                  | -                       | -                 | L,(TA,KC)                    | e                        |
| Bacteria/Eukarya         | -                       | -                 | L,(TA,KC)                    | f                        |
| DPANN                    | L                       | 64                | LE,(K,(TA,C))                | g                        |
| Euryarchaeota            | L                       | 98                | K,(LE,(TA,C))                | h                        |
| Thaumarchaeota           | L                       | 87                | LE,((K,TA),C)                | i                        |
| Crenarchaeota            | K                       | 43                | L,(KE,TA)                    | j                        |
| Aigarchaeota             | L                       | 71                | LE,(T,KC)                    | k                        |
| Korarchaeota             | L                       | 100               | LE,(TA,C)                    | l                        |
| SAGs                     | L                       | 92                | LE,(TA,KC)                   | m                        |

<sup>1</sup>TACKLE: Thaumarchaeota, Aigarchaeota, Crenarchaeota, Korarchaeota, Lokiarchaeota, Eukarya



|                                                                            |               |           |       |    |     |                                                                                                                        |                                                                                                                                                                                                                                                                                                                                                             |
|----------------------------------------------------------------------------|---------------|-----------|-------|----|-----|------------------------------------------------------------------------------------------------------------------------|-------------------------------------------------------------------------------------------------------------------------------------------------------------------------------------------------------------------------------------------------------------------------------------------------------------------------------------------------------------|
| small GTP-binding domain protein, Ran/Ras/Rab/Rho domain signatures        | Lokarch_33450 | contig116 | 14764 | 3  | 195 | ref XP_005703007.1  Rab family, other (Galdieria sulphuraria) - Expect = 2e-35                                         | IPR001806 Small GTPase superfamily; IPR027417 P-loop containing nucleoside triphosphate hydrolase; IPR020041 Ran GTPase; IPR005225 Small GTP-binding protein domain; IPR003578 Small GTPase superfamily, Rho type; IPR003579 Small GTPase superfamily, Rab type; IPR020849 Small GTPase superfamily, Ras type                                               |
| small GTP-binding domain protein, Ran/Ras/Rab/Rho domain signatures        | Lokarch_49520 | contig117 | 14713 | 16 | 191 | emb COW57011.1  ras protein Rab BA (Trichuris trichiura) - Expect = 2e-37                                              | IPR001806 Small GTPase superfamily; IPR027417 P-loop containing nucleoside triphosphate hydrolase; IPR020849 Small GTPase superfamily, Ras type; IPR003578 Small GTPase superfamily, Rho type; IPR003579 Small GTPase superfamily, Rab type; IPR027417 P-loop containing nucleoside triphosphate hydrolase; IPR001806 Small GTPase superfamily, Ras type    |
| small GTP-binding domain protein, Ran/Ras/Rab/Rho domain signatures        | Lokarch_18970 | contig122 | 14305 | 3  | 186 | gb AAK97487.1  small Rab GTPase RabX10 (Trichomonas vaginalis) - Expect = 1e-37                                        | IPR001806 Small GTPase superfamily; IPR020041 Ran GTPase; IPR003579 Small GTPase superfamily, Rho type; IPR003578 Small GTPase superfamily, Rab type; IPR027417 P-loop containing nucleoside triphosphate hydrolase                                                                                                                                         |
| small GTP-binding domain protein, Ran/Ras/Rab/Rho domain signatures        | Lokarch_17150 | contig126 | 13957 | 11 | 162 | ref XP_042458383.1  GTP-binding protein YPTM1, putative (Entamoeba invadens) [P] - Expect = 5e-04                      | IPR027417 P-loop containing nucleoside triphosphate hydrolase; IPR001806 Small GTPase superfamily, Ras type                                                                                                                                                                                                                                                 |
| small GTP-binding domain protein, Ran/Ras/Rab/Rho domain signatures        | Lokarch_38550 | contig127 | 13916 | 5  | 529 | ref XP_006383099.1  PREDICTED: ras-related protein Rab28v (Malus domestica) - Expect = 1e-31                           | IPR001806 Small GTPase superfamily; IPR020041 Ran GTPase; IPR003579 Small GTPase superfamily, Rho type; IPR003578 Small GTPase superfamily, Rab type; IPR027417 P-loop containing nucleoside triphosphate hydrolase                                                                                                                                         |
| small GTP-binding domain protein, Ran/Ras/Rab/Rho domain signatures        | Lokarch_38560 | contig127 | 13916 | 6  | 519 | ref XP_006304917.1  hypothetical protein CARUR_v10010276m (Capsella rubella) - Expect = 3e-33                          | IPR001806 Small GTPase superfamily; IPR027417 P-loop containing nucleoside triphosphate hydrolase; IPR003578 Small GTPase superfamily, Rab type; IPR020849 Small GTPase superfamily, Ras type                                                                                                                                                               |
| small GTP-binding domain protein, Ran/Ras/Rab/Rho domain signatures        | Lokarch_02350 | contig13  | 35460 | 2  | 398 | ref XP_007267677.1  GTP binding protein [Fomitiporia mediterranea MF3/22] - Expect = 2e-3e                             | IPR001806 Small GTPase superfamily; IPR003579 Small GTPase superfamily, Rab type; IPR027417 P-loop containing nucleoside triphosphate hydrolase; IPR020849 Small GTPase superfamily, Ras type; IPR002041 Ran GTPase; IPR003578 Small GTPase superfamily, Rho type; IPR005225 Small GTP-binding protein domain; IPR024156 Small GTPase superfamily, ARF type |
| small GTP-binding domain protein, Ran/Ras/Rab/Rho domain signatures        | Lokarch_12880 | contig134 | 13501 | 14 | 186 | ref XP_005337313.1  PREDICTED: ras-related protein Rab 13, partial (Pseudococcus humilis) - Expect = 2e-27             | IPR001806 Small GTPase superfamily; IPR027417 P-loop containing nucleoside triphosphate hydrolase; IPR005225 Small GTP-binding protein domain; IPR020849 Small GTPase superfamily, Ras type; IPR003579 Small GTPase superfamily, Rab type; IPR003578 Small GTPase superfamily, Rho type                                                                     |
| small GTP-binding domain protein, Ran/Rab-domain signatures                | Lokarch_09250 | contig140 | 13254 | 13 | 203 | gb EPR78369.1  Rab GTPase [Sprague lophii 42_110] - Expect = 1e-21                                                     | IPR020849 Small GTPase superfamily, Ras type; IPR027417 P-loop containing nucleoside triphosphate hydrolase; IPR003579 Small GTPase superfamily, Rab type; IPR005225 Small GTP-binding protein domain; IPR001806 Small GTPase superfamily, Ras type                                                                                                         |
| small GTP-binding domain protein                                           | Lokarch_18500 | contig145 | 12777 | 5  | 209 | gb KC271086.1  putative GTPase (Candidatus Methanogordonia nitroreducens) - Expect = 1e-17                             | IPR006073 GTP binding domain; IPR027417 P-loop containing nucleoside triphosphate hydrolase; IPR001806 Small GTPase superfamily                                                                                                                                                                                                                             |
| small GTP-binding domain protein, Ras/Rab/Rho domain signatures            | Lokarch_18530 | contig145 | 12777 | 8  | 150 | ref XP_003677683.1  hypothetical protein NCA5_000228 (Naumovozyma castellii CBS_4399) - Expect = 3e-17                 | IPR001806 Small GTPase superfamily; IPR027417 P-loop containing nucleoside triphosphate hydrolase; IPR005225 Small GTP-binding protein domain; IPR020849 Small GTPase superfamily, Ras type; IPR003579 Small GTPase superfamily, Rab type; IPR003578 Small GTPase superfamily, Rho type                                                                     |
| small GTP-binding domain protein, Ras/Rab/Rho domain signatures            | Lokarch_15320 | contig148 | 12697 | 2  | 167 | ref XP_002588708.1  RAS oncogene protein [Brachyotona floridae] - Expect = 7e-22                                       | IPR001806 Small GTPase superfamily; IPR027417 P-loop containing nucleoside triphosphate hydrolase; IPR005225 Small GTP-binding protein domain; IPR020849 Small GTPase superfamily, Ras type; IPR003579 Small GTPase superfamily, Rab type                                                                                                                   |
| small GTP-binding domain protein                                           | Lokarch_15340 | contig148 | 12697 | 4  | 209 | gb KC271086.1  putative GTPase (Candidatus Methanogordonia nitroreducens) - Expect = 1e-17                             | IPR006073 GTP binding domain; IPR027417 P-loop containing nucleoside triphosphate hydrolase; IPR001806 Small GTPase superfamily                                                                                                                                                                                                                             |
| GTP binding domain protein, Arf-/Rab-domain signatures                     | Lokarch_19980 | contig15  | 34203 | 27 | 336 | ref XP_008300300.1  PREDICTED: ADP-ribosylation factor like protein 3 [Acanthamoeba vitellinellii] - Expect = 2e-23    | IPR006689 Small GTPase superfamily, ARF/SAR type; IPR027417 P-loop containing nucleoside triphosphate hydrolase; IPR005225 Small GTP-binding protein domain; IPR020849 Small GTPase superfamily, Ras type; IPR003579 Small GTPase superfamily, Rab type; IPR003578 Small GTPase superfamily, Rho type                                                       |
| small GTP-binding domain protein, Ran/Ras/Rab/Rho domain signatures        | Lokarch_52350 | contig16  | 34146 | 22 | 253 | gb EFA7388.1  Rab GTPase [Polysiphonium pallidum PMS00] - Expect = 9e-37                                               | IPR001806 Small GTPase superfamily; IPR005225 Small GTP-binding protein domain; IPR027417 P-loop containing nucleoside triphosphate hydrolase; IPR003579 Small GTPase superfamily, Rab type; IPR020849 Small GTPase superfamily, Ras type; IPR003578 Small GTPase superfamily, Rho type                                                                     |
| small GTP-binding domain protein, Ras/Rab/Rho domain signatures            | Lokarch_26330 | contig171 | 11494 | 1  | 117 | ref XP_004235823.1  PREDICTED: ras-related protein RABA6a-like [Solanum lycopersicum] - Expect = 1e-21                 | IPR001806 Small GTPase superfamily; IPR027417 P-loop containing nucleoside triphosphate hydrolase; IPR006689 Small GTPase superfamily, ARF/SAR type                                                                                                                                                                                                         |
| small GTP-binding domain protein, Arf-domain signature                     | Lokarch_50330 | contig1   | 71539 | 3  | 208 | ref WP_019207911.1  gld11 myosin protein (Thermococcus albus) - Expect = 2e-26                                         | IPR027417 P-loop containing nucleoside triphosphate hydrolase; IPR001806 Small GTPase superfamily, ARF/SAR type                                                                                                                                                                                                                                             |
| small GTP-binding domain protein, Arf-domain signature                     | Lokarch_50350 | contig1   | 71539 | 5  | 229 | ref WP_01340066.1  cpl polarity determinant GTPase Mg1a [Pelobacter carbinolicus] - Expect = 7e-18                     | IPR006689 Small GTPase superfamily, ARF/SAR type; IPR027417 P-loop containing nucleoside triphosphate hydrolase                                                                                                                                                                                                                                             |
| small GTP-binding domain protein, Ran/Ras/Rab/Rho domain signatures        | Lokarch_12240 | contig18  | 33144 | 14 | 184 | ref XP_002670221.1  rab family small GTPase (Naegleria gruberi) - Expect = 4e-31                                       | IPR003579 Small GTPase superfamily, Rab type; IPR005225 Small GTP-binding protein domain; IPR020849 Small GTPase superfamily, Ras type; IPR003578 Small GTPase superfamily, Rho type; IPR027417 P-loop containing nucleoside triphosphate hydrolase                                                                                                         |
| small GTP-binding domain protein, Ras/Rab-domain signature                 | Lokarch_12180 | contig18  | 33144 | 8  | 418 | ref XP_001311003.1  Ras-like GTP-binding protein YPT1 (Trichomonas vaginalis G3) - Expect = 5e-27                      | IPR027417 P-loop containing nucleoside triphosphate hydrolase; IPR001806 Small GTPase superfamily, Ras type; IPR003579 Small GTPase superfamily, Rab type; IPR020849 Small GTPase superfamily, Ras type                                                                                                                                                     |
| small GTP-binding domain protein, Ras/Rab/Rho domain signatures            | Lokarch_01690 | contig189 | 10697 | 13 | 172 | ref XP_002670605.1  rab family small GTPase (Naegleria gruberi) - Expect = 2e-35                                       | IPR003579 Small GTPase superfamily, Rab type; IPR005225 Small GTP-binding protein domain; IPR020849 Small GTPase superfamily, Ras type; IPR003578 Small GTPase superfamily, Rho type                                                                                                                                                                        |
| small GTP-binding domain protein, Ras/Rab/Rho domain signatures            | Lokarch_01650 | contig189 | 10697 | 9  | 174 | ref XP_004383763.1  ras-related protein Rab-2A, putative (Acanthamoeba castellanii str. Naff) - Expect = 2e-38         | IPR003579 Small GTPase superfamily, Rab type; IPR027417 P-loop containing nucleoside triphosphate hydrolase; IPR005225 Small GTP-binding protein domain; IPR020849 Small GTPase superfamily, Ras type; IPR003578 Small GTPase superfamily, Rho type                                                                                                         |
| small GTP-binding domain protein, Ras/Rab/Rho domain signatures            | Lokarch_10880 | contig199 | 10083 | 5  | 180 | ref XP_007900912.1  PREDICTED: ras-related protein Rab 39 [Calothrix miki] - Expect = 4e-38                            | IPR003578 Small GTPase superfamily, Rho type; IPR027417 P-loop containing nucleoside triphosphate hydrolase; IPR005225 Small GTP-binding protein domain; IPR020849 Small GTPase superfamily, Ras type; IPR003579 Small GTPase superfamily, Rab type                                                                                                         |
| small GTP-binding domain protein, Ras/Rab/Rho domain signatures            | Lokarch_37110 | contig206 | 9763  | 5  | 325 | gb AAK97453.1  small Rab GTPase Rab7a (Trichomonas vaginalis) - Expect = 5e-23                                         | IPR003579 Small GTPase superfamily, Rab type; IPR005225 Small GTP-binding protein domain; IPR020849 Small GTPase superfamily, Ras type; IPR003578 Small GTPase superfamily, Rho type; IPR027417 P-loop containing nucleoside triphosphate hydrolase                                                                                                         |
| small GTP-binding domain protein, Rab-/Arf-domain signature                | Lokarch_53730 | contig226 | 8815  | 8  | 176 | gb EY79831.1  ARL3, ARF-like Ras superfamily GTPase (Drosophila trifalxa) - Expect = 2e-14                             | IPR027417 P-loop containing nucleoside triphosphate hydrolase; IPR003579 Small GTPase superfamily, Rab type; IPR001806 Small GTPase superfamily, Ras type; IPR006689 Small GTPase superfamily, ARF/SAR type                                                                                                                                                 |
| small Arf-related GTPase                                                   | Lokarch_28560 | contig23  | 31031 | 20 | 139 | ref XP_007248151.1  PREDICTED: ADP-ribosylation factor like protein 2-like [Acanthamoeba castellanii] - Expect = 9e-15 | IPR006689 Small GTPase superfamily, ARF/SAR type; IPR027417 P-loop containing nucleoside triphosphate hydrolase                                                                                                                                                                                                                                             |
| small Arf-related GTPase                                                   | Lokarch_46160 | contig247 | 8256  | 6  | 268 | ref XP_001642590.1  hypothetical protein Kpo1_332p (Vanderwaltozyma polyspora DSM 70294) - Expect = 0.005              | IPR006689 Small GTPase superfamily, ARF/SAR type; IPR027417 P-loop containing nucleoside triphosphate hydrolase                                                                                                                                                                                                                                             |
| small Arf-related GTPase                                                   | Lokarch_01140 | contig2   | 58255 | 31 | 309 | emb CEN78716.1  GTR1, Ras superfamily GTPase [Ctrocaryum siliculosus] - Expect = 5e-14                                 | IPR006689 Small GTPase superfamily, ARF/SAR type; IPR027417 P-loop containing nucleoside triphosphate hydrolase; IPR001806 Small GTPase superfamily                                                                                                                                                                                                         |
| small GTP-binding domain protein                                           | Lokarch_01230 | contig2   | 58255 | 40 | 186 | gb KC272488.1  small GTP-binding protein domain (Candidatus Methanogordonia nitroreducens) - Expect = 3e-12            | IPR001806 Small GTPase superfamily; IPR027417 P-loop containing nucleoside triphosphate hydrolase                                                                                                                                                                                                                                                           |
| small GTP-binding domain protein, Ras/Rab/Rho domain signatures            | Lokarch_34920 | contig26  | 30581 | 30 | 192 | ref XP_005737420.1  PREDICTED: ras-related protein Rab 33B-like [Pundamilia nyereerei] - Expect = 1e-25                | IPR001806 Small GTPase superfamily; IPR027417 P-loop containing nucleoside triphosphate hydrolase; IPR003579 Small GTPase superfamily, Rab type; IPR003578 Small GTPase superfamily, Rho type; IPR020849 Small GTPase superfamily, Ras type; IPR005225 Small GTP-binding protein domain                                                                     |
| small GTP-binding domain protein, Ras/Rab/Rho domain signatures            | Lokarch_02670 | contig263 | 7607  | 7  | 159 | gb AAK97487.1  small Rab GTPase RabX10 (Trichomonas vaginalis) - Expect = 1e-27                                        | IPR003579 Small GTPase superfamily, Rab type; IPR005225 Small GTP-binding protein domain; IPR020849 Small GTPase superfamily, Ras type; IPR001806 Small GTPase superfamily, Ras type                                                                                                                                                                        |
| small GTP-binding domain protein, Arf-/Gtr1/Rag G protein domain signature | Lokarch_51460 | contig268 | 7411  | 6  | 403 | emb CEN80551.1  ADP-ribosylation factor 4 [Dicerantrichus labrax] - Expect = 2e-10                                     | IPR027417 P-loop containing nucleoside triphosphate hydrolase; IPR024156 Small GTPase superfamily, ARF type; IPR001806 Small GTPase superfamily                                                                                                                                                                                                             |
| small GTP-binding domain protein, Rab/Rab-/Arf-domain signatures           | Lokarch_44040 | contig274 | 7051  | 1  | 342 | ref XP_008828394.1  ADP-ribosylation factor family protein 1, putative (Hannemania hammondii) - Expect = 6e-14         | IPR027417 P-loop containing nucleoside triphosphate hydrolase; IPR003578 Small GTPase superfamily, Rho type; IPR02314 Elongated TPR repeat-containing domain; IPR003579 Small GTPase superfamily, Rab type; IPR005225 Small GTP-binding protein domain; IPR024156 Small GTPase superfamily, ARF type; IPR006689 Small GTPase superfamily, ARF/SAR type      |
| small GTP-binding domain protein, Ras/Rab/Rho domain signatures            | Lokarch_39540 | contig29  | 29291 | 7  | 159 | ref XP_002903160.1  Rab32/38 family GTPase, putative [Phytophthora infestans T30-4] - Expect = 2e-21                   | IPR001806 Small GTPase superfamily; IPR027417 P-loop containing nucleoside triphosphate hydrolase; IPR003579 Small GTPase superfamily, Rab type; IPR005225 Small GTP-binding protein domain; IPR020849 Small GTPase superfamily, Ras type                                                                                                                   |
| small GTP-binding domain protein, Ran/Ras/Rab/Rho domain signatures        | Lokarch_39550 | contig29  | 29291 | 8  | 186 | ref XP_008559290.1  PREDICTED: ras-related protein Rab 23 [Mycobacterium demoticum] - Expect = 2e-30                   | IPR020849 Small GTPase superfamily, Ras type; IPR005225 Small GTP-binding protein domain; IPR020041 Ran GTPase; IPR027417 P-loop containing nucleoside triphosphate hydrolase; IPR003579 Small GTPase superfamily, Rab type; IPR001806 Small GTPase superfamily, Ras type                                                                                   |
| small GTP-binding domain protein, Ras/Rab/Rho domain signatures            | Lokarch_47920 | contig32  | 28483 | 17 | 178 | gb AAW31982.1  CG2532 [Drosophila melanogaster] - Expect = 7e-41                                                       | IPR001806 Small GTPase superfamily; IPR005225 Small GTP-binding protein domain; IPR027417 P-loop containing nucleoside triphosphate hydrolase; IPR020849 Small GTPase superfamily, Ras type; IPR003579 Small GTPase superfamily, Rab type; IPR027417 P-loop containing nucleoside triphosphate hydrolase                                                    |
| small GTP-binding domain protein, Ras/Rab/Rho domain signatures            | Lokarch_27490 | contig33  | 28201 | 16 | 178 | gb AAW31980.1  CG2532 [Drosophila melanogaster] - Expect = 3e-40                                                       | IPR003579 Small GTPase superfamily, Rab type; IPR027417 P-loop containing nucleoside triphosphate hydrolase; IPR003578 Small GTPase superfamily, Rab type; IPR003579 Small GTPase superfamily, Rab type; IPR027417 P-loop containing nucleoside triphosphate hydrolase                                                                                      |
| small GTP-binding domain protein, Ras/Rab-/Arf-domain signatures           | Lokarch_10070 | contig356 | 4727  | 3  | 344 | gb KON1599.1  hypothetical protein RS468_00144, partial [Rhizoctonia solani AG-8 WAC10335] - Expect = 8e-17            | IPR001806 Small GTPase superfamily; IPR027417 P-loop containing nucleoside triphosphate hydrolase; IPR024156 Small GTPase superfamily, ARF type; IPR006689 Small GTPase superfamily, ARF/SAR type; IPR003579 Small GTPase superfamily, Rab type; IPR003578 Small GTPase superfamily, Rho type                                                               |
| small GTP-binding domain protein, Ras/Rab/Rho domain signatures            | Lokarch_48070 | contig383 | 4065  | 4  | 178 | emb CAI93947.1  rab_B12 [Paramecium tetraurelia] - Expect = 5e-29                                                      | IPR003579 Small GTPase superfamily, Rab type; IPR003578 Small GTPase superfamily, Rho type; IPR001806 Small GTPase superfamily; IPR027417 P-loop containing nucleoside triphosphate hydrolase; IPR005225 Small GTP-binding protein domain; IPR020849 Small GTPase superfamily, Ras type                                                                     |
| small GTP-binding domain protein, Ras/Rab/Rho domain signatures            | Lokarch_21100 | contig385 | 3995  | 2  | 199 | ref XP_006431526.1  PREDICTED: ras-related protein RABA6a-like [Solanum tuberosum] - Expect = 3e-26                    | IPR001806 Small GTPase superfamily; IPR027417 P-loop containing nucleoside triphosphate hydrolase; IPR005225 Small GTP-binding protein domain; IPR020849 Small GTPase superfamily, Ras type; IPR003578 Small GTPase superfamily, Rho type; IPR003579 Small GTPase superfamily, Rab type                                                                     |



|                                                                                 |                |           |       |    |     |                                                                                                                                          |                                                                                                                                                                                                                                                                                         |
|---------------------------------------------------------------------------------|----------------|-----------|-------|----|-----|------------------------------------------------------------------------------------------------------------------------------------------|-----------------------------------------------------------------------------------------------------------------------------------------------------------------------------------------------------------------------------------------------------------------------------------------|
| small GTP-binding domain protein, Ras/Rab/Rho domain signatures                 | LokIarch_21460 | contig386 | 3992  | 2  | 204 | <b>gb E1W34887.1 </b> hypothetical protein PFTANZ_04420 [Plasmodium falciparum Tanzania (2000708)] - Expect = 2e-26                      | IPR001806 Small GTPase superfamily; IPR027417 P-loop containing nucleoside triphosphate hydrolase; IPR020849 Small GTPase superfamily, Rab type; IPR003579 Small GTPase superfamily, Rab type; IPR003578 Small GTPase superfamily, Rho type; IPR005225 Small GTP-binding protein domain |
| small GTP-binding domain protein, Ran/Ras/Rab/Rho domain signatures             | LokIarch_04620 | contig403 | 3729  | 2  | 195 | <b>ref XP_003969638.1 </b> PREDICTED: ras-related protein Rab-8B-like [Takifugu rubripes] - Expect = 2e-34                               | IPR003579 Small GTPase superfamily, Rab type; IPR001806 Small GTPase superfamily; IPR027417 P-loop containing nucleoside triphosphate hydrolase; IPR020849 Small GTPase superfamily, Rab type; IPR003578 Small GTPase superfamily, Rho type; IPR005225 Small GTP-binding protein domain |
| small GTP-binding domain protein, Arf-domain signature                          | LokIarch_35740 | contig404 | 3724  | 2  | 206 | <b>ref WP_013885421.1 </b> mutual gliding protein A [Fleissipes stenoschizii] - Expect = 3e-22                                           | IPR001806 Small GTPase superfamily; IPR027417 P-loop containing nucleoside triphosphate hydrolase; IPR020849 Small GTPase superfamily, Rab type; IPR003578 Small GTPase superfamily, Rho type; IPR005225 Small GTP-binding protein domain                                               |
| small GTP-binding domain protein, Ras/Rab/Rho domain signatures                 | LokIarch_33750 | contig427 | 3400  | 1  | 235 | <b>gb AF07603.1 </b> small GTP-binding protein (RAB) [uncultured marine group I/II euryarchaeote KM3_205_c10] - Expect = 2e-31           | IPR001806 Small GTPase superfamily; IPR027417 P-loop containing nucleoside triphosphate hydrolase; IPR020849 Small GTPase superfamily, Rab type; IPR003578 Small GTPase superfamily, Rho type; IPR005225 Small GTP-binding protein domain                                               |
| small GTP-binding domain protein, Ras/Rab/Rho domain signatures                 | LokIarch_33770 | contig427 | 3400  | 3  | 308 | <b>emb CG62788.1 </b> GTPase Yp3 [Taphrina deformans PYCC 5710] - Expect = 3e-32                                                         | IPR001806 Small GTPase superfamily; IPR027417 P-loop containing nucleoside triphosphate hydrolase; IPR020849 Small GTPase superfamily, Rab type; IPR003578 Small GTPase superfamily, Rho type; IPR005225 Small GTP-binding protein domain                                               |
| small GTP-binding domain protein, Ras/Rab/Rho domain signatures                 | LokIarch_35450 | contig43  | 23852 | 5  | 159 | <b>ref XP_006347973.1 </b> PREDICTED: ras-related protein RAB22c-like [Solanum tuberosum] - Expect = 3e-28                               | IPR001806 Small GTPase superfamily; IPR027417 P-loop containing nucleoside triphosphate hydrolase; IPR020849 Small GTPase superfamily, Rab type; IPR003578 Small GTPase superfamily, Rho type; IPR005225 Small GTP-binding protein domain                                               |
| small GTP-binding domain protein, Arf-domain signature                          | LokIarch_30230 | contig442 | 3214  | 3  | 198 | <b>ref WP_013638657.1 </b> mutual gliding protein A [Desulfurobacterium thermolithotrophum] - Expect = 2e-32                             | IPR001806 Small GTPase superfamily; IPR027417 P-loop containing nucleoside triphosphate hydrolase; IPR020849 Small GTPase superfamily, Rab type; IPR003578 Small GTPase superfamily, Rho type; IPR005225 Small GTP-binding protein domain                                               |
| small GTP-binding domain protein, Ras/Rab-domain signatures                     | LokIarch_52000 | contig480 | 2660  | 1  | 137 | <b>emb CAP22858.2 </b> Protein CBR-Rab-19 [Caenorhabditis briggsae] - Expect = 5e-25                                                     | IPR001806 Small GTPase superfamily; IPR027417 P-loop containing nucleoside triphosphate hydrolase; IPR020849 Small GTPase superfamily, Rab type; IPR003578 Small GTPase superfamily, Rho type; IPR005225 Small GTP-binding protein domain                                               |
| small GTP-binding domain protein, Arf-domain signature                          | LokIarch_09000 | contig48  | 23111 | 8  | 522 | <b>ref XP_455999.1 </b> hypothetical protein [Khuyteromyces lactis NR6 V 1140] - Expect = 3e-06                                          | IPR001806 Small GTPase superfamily; IPR027417 P-loop containing nucleoside triphosphate hydrolase; IPR020849 Small GTPase superfamily, Rab type; IPR003578 Small GTPase superfamily, Rho type; IPR005225 Small GTP-binding protein domain                                               |
| small GTP-binding domain protein, Ras/Rab-domain signatures                     | LokIarch_11830 | contig515 | 2182  | 1  | 137 | <b>gb AAK97487.1 </b> small Rab GTPase RabX10 [Trichomonas vaginalis] - Expect = 1e-23                                                   | IPR001806 Small GTPase superfamily; IPR027417 P-loop containing nucleoside triphosphate hydrolase; IPR020849 Small GTPase superfamily, Rab type; IPR003578 Small GTPase superfamily, Rho type; IPR005225 Small GTP-binding protein domain                                               |
| small GTP-binding domain protein, Rho/Ras/Rab-domain signatures                 | LokIarch_32470 | contig5   | 44173 | 46 | 320 | <b>ref XP_001020738.1 </b> Ras family protein [Tetrahymena thermophila] - Expect = 3e-32                                                 | IPR001806 Small GTPase superfamily; IPR027417 P-loop containing nucleoside triphosphate hydrolase; IPR020849 Small GTPase superfamily, Rab type; IPR003578 Small GTPase superfamily, Rho type; IPR005225 Small GTP-binding protein domain                                               |
| small GTP-binding domain protein, Ran/Ras/Rab/Rho domain signatures             | LokIarch_36830 | contig572 | 1582  | 1  | 338 | <b>gb AAK97487.1 </b> small Rab GTPase RabX10 [Trichomonas vaginalis] - Expect = 2e-37                                                   | IPR001806 Small GTPase superfamily; IPR027417 P-loop containing nucleoside triphosphate hydrolase; IPR020849 Small GTPase superfamily, Rab type; IPR003578 Small GTPase superfamily, Rho type; IPR005225 Small GTP-binding protein domain                                               |
| small GTP-binding domain protein                                                | LokIarch_09940 | contig593 | 1436  | 1  | 117 | <b>ref XP_00827954.1 </b> putative rab1 small GTP-binding protein [Leishmania mexicana MHOM/GU/2009/U1103] - Expect = 2e-21              | IPR001806 Small GTPase superfamily; IPR027417 P-loop containing nucleoside triphosphate hydrolase; IPR020849 Small GTPase superfamily, Rab type; IPR003578 Small GTPase superfamily, Rho type; IPR005225 Small GTP-binding protein domain                                               |
| small GTP-binding domain protein, Ras/Rab/Rho domain signatures                 | LokIarch_44790 | contig620 | 1309  | 1  | 179 | <b>ref XP_002787013.1 </b> RAB6 protein, putative [Perkinsus marinus ATCC 59883] - Expect = 2e-38                                        | IPR001806 Small GTPase superfamily; IPR027417 P-loop containing nucleoside triphosphate hydrolase; IPR020849 Small GTPase superfamily, Rab type; IPR003578 Small GTPase superfamily, Rho type; IPR005225 Small GTP-binding protein domain                                               |
| small GTP-binding domain protein, Ras/Rab/Rho domain signatures                 | LokIarch_53220 | contig63  | 20695 | 12 | 170 | <b>emb C144483.1 </b> rab_C72 [Paramoecium tetraurelia] - Expect = 2e-25                                                                 | IPR001806 Small GTPase superfamily; IPR027417 P-loop containing nucleoside triphosphate hydrolase; IPR020849 Small GTPase superfamily, Rab type; IPR003578 Small GTPase superfamily, Rho type; IPR005225 Small GTP-binding protein domain                                               |
| small GTP-binding domain protein, Ran/Ras/Rab/Rho domain signatures             | LokIarch_53190 | contig63  | 20695 | 9  | 588 | <b>PHAVU_010G116500g</b> [Phaenocarpa vulgaris] - Expect = 2e-46                                                                         | IPR001806 Small GTPase superfamily; IPR027417 P-loop containing nucleoside triphosphate hydrolase; IPR020849 Small GTPase superfamily, Rab type; IPR003578 Small GTPase superfamily, Rho type; IPR005225 Small GTP-binding protein domain                                               |
| small GTP-binding domain protein, Ran/Ras/Rab/Rho domain signatures             | LokIarch_36400 | contig64  | 20324 | 13 | 252 | <b>emb CCD81400.1 </b> putative rab-2.4.14 [Schistosoma mansoni] - Expect = 5e-38                                                        | IPR001806 Small GTPase superfamily; IPR027417 P-loop containing nucleoside triphosphate hydrolase; IPR020849 Small GTPase superfamily, Rab type; IPR003578 Small GTPase superfamily, Rho type; IPR005225 Small GTP-binding protein domain                                               |
| small GTP-binding domain protein, Ras/Rab/Rho domain signatures                 | LokIarch_33970 | contig6   | 43995 | 15 | 174 | <b>emb CAI39320.1 </b> rab_C09 [Paramoecium tetraurelia] - Expect = 3e-32                                                                | IPR001806 Small GTPase superfamily; IPR027417 P-loop containing nucleoside triphosphate hydrolase; IPR020849 Small GTPase superfamily, Rab type; IPR003578 Small GTPase superfamily, Rho type; IPR005225 Small GTP-binding protein domain                                               |
| small GTP-binding domain protein, Ras/Rab/Rho domain signatures                 | LokIarch_31830 | contig65  | 20269 | 11 | 180 | <b>emb CDS34289.1 </b> small GTP binding protein [Hymenolepis microstoma] - Expect = 7e-36                                               | IPR001806 Small GTPase superfamily; IPR027417 P-loop containing nucleoside triphosphate hydrolase; IPR020849 Small GTPase superfamily, Rab type; IPR003578 Small GTPase superfamily, Rho type; IPR005225 Small GTP-binding protein domain                                               |
| small GTP-binding domain protein, Ras/Rab/Rho domain signatures                 | LokIarch_31850 | contig65  | 20269 | 13 | 189 | <b>ref XP_007229676.1 </b> PREDICTED: ras-related protein Rab-43-like isoform X1 [Axya mexicanus] - Expect = 1e-41                       | IPR001806 Small GTPase superfamily; IPR027417 P-loop containing nucleoside triphosphate hydrolase; IPR020849 Small GTPase superfamily, Rab type; IPR003578 Small GTPase superfamily, Rho type; IPR005225 Small GTP-binding protein domain                                               |
| small GTP-binding domain protein, Ran/Ras/Rab/Rho domain signatures             | LokIarch_31930 | contig65  | 20269 | 21 | 176 | <b>gb EP98037.1 </b> rab family, other [Mucor circinelloides f. circinelloides 10906a] - Expect = 9e-41                                  | IPR001806 Small GTPase superfamily; IPR027417 P-loop containing nucleoside triphosphate hydrolase; IPR020849 Small GTPase superfamily, Rab type; IPR003578 Small GTPase superfamily, Rho type; IPR005225 Small GTP-binding protein domain                                               |
| small GTP-binding domain protein, Ras/Rab/Rho domain signatures                 | LokIarch_31960 | contig65  | 20269 | 24 | 137 | <b>gb AAK97487.1 </b> small Rab GTPase Rab7a [Trichomonas vaginalis] - Expect = 1e-24                                                    | IPR001806 Small GTPase superfamily; IPR027417 P-loop containing nucleoside triphosphate hydrolase; IPR020849 Small GTPase superfamily, Rab type; IPR003578 Small GTPase superfamily, Rho type; IPR005225 Small GTP-binding protein domain                                               |
| small GTP-binding domain protein, Ran/Ras/Rab/Rho domain signatures             | LokIarch_31810 | contig65  | 20269 | 9  | 181 | <b>ref XP_005848651.1 </b> hypothetical protein CHNCRARF_4972 [Chironella variabilis] - Expect = 8e-38                                   | IPR001806 Small GTPase superfamily; IPR027417 P-loop containing nucleoside triphosphate hydrolase; IPR020849 Small GTPase superfamily, Rab type; IPR003578 Small GTPase superfamily, Rho type; IPR005225 Small GTP-binding protein domain                                               |
| small GTP-binding domain protein, Ran/Ras/Rab/Rho domain signatures             | LokIarch_18250 | contig72  | 18733 | 12 | 182 | <b>gb AAK97487.1 </b> small Rab GTPase RabX10 [Trichomonas vaginalis] - Expect = 5e-38                                                   | IPR001806 Small GTPase superfamily; IPR027417 P-loop containing nucleoside triphosphate hydrolase; IPR020849 Small GTPase superfamily, Rab type; IPR003578 Small GTPase superfamily, Rho type; IPR005225 Small GTP-binding protein domain                                               |
| small GTP-binding domain protein, Arf- and Gr1/RagA G protein domain signatures | LokIarch_18170 | contig72  | 18733 | 4  | 413 | <b>gb EA88441.1 </b> ADP-ribosylation factor (Arf)/Arf-like small GTPase family protein [Tetrahymena thermophila 02120] - Expect = 5e-11 | IPR001806 Small GTPase superfamily; IPR027417 P-loop containing nucleoside triphosphate hydrolase; IPR020849 Small GTPase superfamily, Rab type; IPR003578 Small GTPase superfamily, Rho type; IPR005225 Small GTP-binding protein domain                                               |
| small GTP-binding domain protein, Ran/Ras/Rab/Rho domain signatures             | LokIarch_30440 | contig74  | 18368 | 12 | 181 | <b>emb C144483.1 </b> rab_B25 [Paramoecium tetraurelia] - Expect = 4e-40                                                                 | IPR001806 Small GTPase superfamily; IPR027417 P-loop containing nucleoside triphosphate hydrolase; IPR020849 Small GTPase superfamily, Rab type; IPR003578 Small GTPase superfamily, Rho type; IPR005225 Small GTP-binding protein domain                                               |
| small GTP-binding domain protein, Ras/Rab/Rho domain signatures                 | LokIarch_30390 | contig74  | 18368 | 7  | 244 | <b>gb EG807418.1 </b> hypothetical protein AURANDRAFT_6384 [Aureococcus anophagefferens] - Expect = 1e-17                                | IPR001806 Small GTPase superfamily; IPR027417 P-loop containing nucleoside triphosphate hydrolase; IPR020849 Small GTPase superfamily, Rab type; IPR003578 Small GTPase superfamily, Rho type; IPR005225 Small GTP-binding protein domain                                               |
| small GTP-binding domain protein, Rho/Ras/Rab-domain signatures                 | LokIarch_04160 | contig77  | 18214 | 10 | 521 | <b>ref XP_005232828.1 </b> protein with unknown function [Ricinus communis] - Expect = 8e-31                                             | IPR001806 Small GTPase superfamily; IPR027417 P-loop containing nucleoside triphosphate hydrolase; IPR020849 Small GTPase superfamily, Rab type; IPR003578 Small GTPase superfamily, Rho type; IPR005225 Small GTP-binding protein domain                                               |
| small GTP-binding domain protein, Rho/Ras/Rab-domain signatures                 | LokIarch_04210 | contig77  | 18214 | 15 | 170 | <b>ref XP_003645458.1 </b> hypothetical protein Eym_3137 [Eremothidium cymbalariae OUVPGF215] - Expect = 1e-24                           | IPR001806 Small GTPase superfamily; IPR027417 P-loop containing nucleoside triphosphate hydrolase; IPR020849 Small GTPase superfamily, Rab type; IPR003578 Small GTPase superfamily, Rho type; IPR005225 Small GTP-binding protein domain                                               |
| small GTP-binding domain protein, Rho/Ras/Rab-domain signatures                 | LokIarch_22470 | contig80  | 17811 | 16 | 348 | <b>emb CAI39307.1 </b> rab_C39 [Paramoecium tetraurelia] - Expect = 1e-36                                                                | IPR001806 Small GTPase superfamily; IPR027417 P-loop containing nucleoside triphosphate hydrolase; IPR020849 Small GTPase superfamily, Rab type; IPR003578 Small GTPase superfamily, Rho type; IPR005225 Small GTP-binding protein domain                                               |
| small GTP-binding domain protein, Ras/Rab-domain signatures                     | LokIarch_45420 | contig8   | 42635 | 19 | 175 | <b>ref WP_002698198.1 </b> small GTP-binding protein domain [Micrococcia marina] - Expect = 1e-31                                        | IPR001806 Small GTPase superfamily; IPR027417 P-loop containing nucleoside triphosphate hydrolase; IPR020849 Small GTPase superfamily, Rab type; IPR003578 Small GTPase superfamily, Rho type; IPR005225 Small GTP-binding protein domain                                               |
| small GTP-binding domain protein, Arf- and Gr1/RagA G protein domain signatures | LokIarch_03700 | contig87  | 16838 | 6  | 413 | <b>ref NP_001120241.1 </b> ADP-ribosylation factor-like 5, gene 2 [Xenopus laevis] - Expect = 2e-12                                      | IPR001806 Small GTPase superfamily; IPR027417 P-loop containing nucleoside triphosphate hydrolase; IPR020849 Small GTPase superfamily, Rab type; IPR003578 Small GTPase superfamily, Rho type; IPR005225 Small GTP-binding protein domain                                               |
| small GTP-binding domain protein, Arf-domain signature                          | LokIarch_45120 | contig88  | 16776 | 18 | 220 | <b>ref WP_009551737.1 </b> gliding motility protein [Thermococcus sp. GBS] - Expect = 1e-12                                              | IPR001806 Small GTPase superfamily; IPR027417 P-loop containing nucleoside triphosphate hydrolase; IPR020849 Small GTPase superfamily, Rab type; IPR003578 Small GTPase superfamily, Rho type; IPR005225 Small GTP-binding protein domain                                               |
| small GTP-binding domain protein, Rho/Ras/Rab-domain signatures                 | LokIarch_44980 | contig88  | 16776 | 4  | 174 | <b>ref XP_005993187.1 </b> PREDICTED: ras-related protein Rab-39B-like [Latimeria chalumnae] - Expect = 1e-32                            | IPR001806 Small GTPase superfamily; IPR027417 P-loop containing nucleoside triphosphate hydrolase; IPR020849 Small GTPase superfamily, Rab type; IPR003578 Small GTPase superfamily, Rho type; IPR005225 Small GTP-binding protein domain                                               |
| small GTP-binding domain protein, Rho/Ras/Rab-domain signatures                 | LokIarch_17900 | contig92  | 16479 | 15 | 178 | <b>gb E1Y72016.1 </b> Rab GTPase 2b [Oryzichthys latipes] - Expect = 3e-34                                                               | IPR001806 Small GTPase superfamily; IPR027417 P-loop containing nucleoside triphosphate hydrolase; IPR020849 Small GTPase superfamily, Rab type; IPR003578 Small GTPase superfamily, Rho type; IPR005225 Small GTP-binding protein domain                                               |
| small GTP-binding domain protein, Ras/Rab-domain signatures                     | LokIarch_04470 | contig93  | 16190 | 16 | 307 | <b>ref XP_002175038.1 </b> GTPase Yp3 [Schizosaccharomyces japonicus yf3275] - Expect = 4e-18                                            | IPR001806 Small GTPase superfamily; IPR027417 P-loop containing nucleoside triphosphate hydrolase; IPR020849 Small GTPase superfamily, Rab type; IPR003578 Small GTPase superfamily, Rho type; IPR005225 Small GTP-binding protein domain                                               |
| small GTP-binding domain protein, Ran/Ras/Rab-domain signatures                 | LokIarch_04480 | contig93  | 16190 | 17 | 314 | <b>emb CHK21525.2 </b> unnamed protein product [Blattostyris hominis] - Expect = 3e-25                                                   | IPR001806 Small GTPase superfamily; IPR027417 P-loop containing nucleoside triphosphate hydrolase; IPR020849 Small GTPase superfamily, Rab type; IPR003578 Small GTPase superfamily, Rho type; IPR005225 Small GTP-binding protein domain                                               |
| small GTP-binding domain protein, Arf-domain signature                          | LokIarch_43010 | contig94  | 16135 | 17 | 280 | <b>ref XP_004952022.1 </b> PREDICTED: ADP-ribosylation factor-like [Setaria italica] - Expect = 6e-10                                    | IPR001806 Small GTPase superfamily; IPR027417 P-loop containing nucleoside triphosphate hydrolase; IPR020849 Small GTPase superfamily, Rab type; IPR003578 Small GTPase superfamily, Rho type; IPR005225 Small GTP-binding protein domain                                               |
| small GTP-binding domain protein, Gr1/RagA G protein-domain signature           | LokIarch_42900 | contig94  | 16135 | 6  | 502 | <b>ref XP_00439010.1 </b> PREDICTED: ADP-ribosylation factor related protein 1-like [Solanum lycopersicum] - Expect = 2e-12              | IPR001806 Small GTPase superfamily; IPR027417 P-loop containing nucleoside triphosphate hydrolase; IPR020849 Small GTPase superfamily, Rab type; IPR003578 Small GTPase superfamily, Rho type; IPR005225 Small GTP-binding protein domain                                               |
| small GTP-binding domain protein, Ran/Ras/Rab/Rho domain signatures             | LokIarch_21790 | contig95  | 16096 | 7  | 174 | <b>ref XP_007432382.1 </b> PREDICTED: ras-related protein Rab-35-like isoform X1 [Python bivittatus] - Expect = 1e-39                    | IPR001806 Small GTPase superfamily; IPR027417 P-loop containing nucleoside triphosphate hydrolase; IPR020849 Small GTPase superfamily, Rab type; IPR003578 Small GTPase superfamily, Rho type; IPR005225 Small GTP-binding protein domain                                               |
| small GTP-binding domain protein, Arf-domain signature                          | LokIarch_11040 | contig98  | 15711 | 9  | 522 | <b>gb EFK87182.1 </b> hypothetical protein DAPD047AT_187483 [Daphnia pulex] - Expect = 1e-07                                             | IPR001806 Small GTPase superfamily; IPR027417 P-loop containing nucleoside triphosphate hydrolase; IPR020849 Small GTPase superfamily, Rab type; IPR003578 Small GTPase superfamily, Rho type; IPR005225 Small GTP-binding protein domain                                               |

| Product                                                                                                    | Locus tag        | Contig        | Contig length        | ORF number        | Protein length (AA)        | Best Blast Hits (e-value threshold: 0.02)                                                                                                                | IPR domain                                                                                                                                                                                                                                                                              | Note                                                                       |
|------------------------------------------------------------------------------------------------------------|------------------|---------------|----------------------|-------------------|----------------------------|----------------------------------------------------------------------------------------------------------------------------------------------------------|-----------------------------------------------------------------------------------------------------------------------------------------------------------------------------------------------------------------------------------------------------------------------------------------|----------------------------------------------------------------------------|
| small GTP-binding domain protein, Rho/Ras/Rab domain signatures                                            | Loklarch_51330   | contig99      | 15668                | 4                 | 308                        | emb CD56879.1  RAS small GTPase, putative [Eimeria maxima] - Expect = 4e-31                                                                              | IPR027417 P-loop containing nucleoside triphosphate hydrolase; IPR003578 Small GTPase superfamily, Rho type; IPR020849 Small GTPase superfamily, Ras type; IPR001806 Small GTPase superfamily; IPR005225 Small GTP-binding protein domain; IPR003579 Small GTPase superfamily, Rab type |                                                                            |
| small GTP-binding domain protein, Rho/Ras/Rab domain signatures                                            | Loklarch_51340   | contig99      | 15668                | 5                 | 308                        | ref XP_001633043.1  predicted protein [Nematostella vectensis] - Expect = 2e-29                                                                          | IPR027417 P-loop containing nucleoside triphosphate hydrolase; IPR003578 Small GTPase superfamily, Rho type; IPR020849 Small GTPase superfamily, Ras type; IPR001806 Small GTPase superfamily; IPR005225 Small GTP-binding protein domain; IPR003579 Small GTPase superfamily, Rab type |                                                                            |
| small GTP-binding domain protein, Rho/Ras/Rab domain signatures                                            | Loklarch_51370   | contig99      | 15668                | 8                 | 328                        | ref WP_028458193.1  GTP-binding protein [Chloroflexus sp. V.206.1] - Expect = 8e-30                                                                      | IPR027417 P-loop containing nucleoside triphosphate hydrolase; IPR003578 Small GTPase superfamily, Rho type; IPR020849 Small GTPase superfamily, Ras type; IPR001806 Small GTPase superfamily; IPR005225 Small GTP-binding protein domain; IPR003579 Small GTPase superfamily, Rab type |                                                                            |
| small GTP-binding domain protein, Rho/Ras/Rab domain signatures                                            | Loklarch_00500   | contig255     | 7954                 | 10                | 180                        | ref XP_005848051.1  hypothetical protein CHLNCORAF1_48772 [Chlorella variabilis] - Expect = 4e-38                                                        | IPR001806 Small GTPase superfamily, IPR003579 Small GTPase superfamily, Rab type; IPR020849 Small GTPase superfamily, Ras type; IPR001806 Small GTPase superfamily; IPR005225 Small GTP-binding protein domain; IPR003578 Small GTPase superfamily, Rho type                            |                                                                            |
| putative small GTPase family protein                                                                       | Loklarch_04170   | contig77      | 18214                | 11                | 45                         |                                                                                                                                                          | IPR001806 Small GTPase superfamily; IPR027417 P-loop containing nucleoside triphosphate hydrolase                                                                                                                                                                                       |                                                                            |
| <b>Roadblock/LC7 domain proteins (no ESPs, see also Suppl. Table S18 Product)</b>                          | <b>Locus tag</b> | <b>Contig</b> | <b>Contig length</b> | <b>ORF number</b> | <b>Protein length (AA)</b> | <b>Best Blast Hits (e-value threshold: 0.02)</b>                                                                                                         | <b>IPR domain</b>                                                                                                                                                                                                                                                                       | <b>Note</b>                                                                |
| Roadblock/LC7 domain protein                                                                               | Loklarch_02330   | contig229     | 8750                 | 7                 | 153                        | ref WP_015790751.1  hypothetical protein [Methanocaldococcus fervens] - Expect = 1e-11                                                                   | IPR004942 Dynein light chain-related; IPR004942 Dynein light chain-related                                                                                                                                                                                                              |                                                                            |
| Roadblock/LC7 domain protein                                                                               | Loklarch_03940   | contig143     | 12833                | 4                 | 142                        | ref WP_00816295.1  Hypothetical protein [Wohlfahrtiimonas chitiniclastica] - Expect = 4e-11                                                              | IPR004942 Dynein light chain-related; IPR004942 Dynein light chain-related                                                                                                                                                                                                              |                                                                            |
| hypothetical protein                                                                                       | Loklarch_06200   | contig639     | 1183                 | 2                 | 131                        | db BA04315.1  conserved hypothetical protein [gamma proteobacterium Hiromi] - Expect = 0.003                                                             | IPR004942 Dynein light chain-related; IPR004942 Dynein light chain-related                                                                                                                                                                                                              |                                                                            |
| Roadblock/LC7 domain protein                                                                               | Loklarch_06410   | contig187     | 10803                | 19                | 135                        | db BA04315.1  conserved hypothetical protein [gamma proteobacterium Hiromi] - Expect = 1e-32                                                             | IPR004942 Dynein light chain-related; IPR004942 Dynein light chain-related                                                                                                                                                                                                              |                                                                            |
| Roadblock/LC7 domain protein                                                                               | Loklarch_06430   | contig25      | 30688                | 2                 | 117                        | ref WP_027845797.1  diacylglycerol transferase [Mastigosporea testatum] - Expect = 0.004                                                                 | IPR004942 Dynein light chain-related; IPR004942 Dynein light chain-related                                                                                                                                                                                                              |                                                                            |
| Roadblock/LC7 domain protein                                                                               | Loklarch_06490   | contig25      | 30688                | 8                 | 100                        | g EH71444.1  roadblock [Dinorae pleuropis] - Expect = 9e-09                                                                                              | IPR004942 Dynein light chain-related; IPR004942 Dynein light chain-related                                                                                                                                                                                                              |                                                                            |
| Roadblock/LC7 domain protein                                                                               | Loklarch_08020   | contig352     | 4793                 | 6                 | 117                        | ref WP_013644234.1  hypothetical protein [Methanobacterium boursii] - Expect = 1e-13                                                                     | IPR004942 Dynein light chain-related; IPR004942 Dynein light chain-related                                                                                                                                                                                                              |                                                                            |
| Roadblock/LC7 domain protein                                                                               | Loklarch_25010   | contig415     | 3579                 | 4                 | 117                        | ref WP_014453667.1  hypothetical protein [Caldisericum estii] - Expect = 9e-14                                                                           | IPR004942 Dynein light chain-related; IPR004942 Dynein light chain-related                                                                                                                                                                                                              |                                                                            |
| Roadblock/LC7 domain protein                                                                               | Loklarch_41940   | contig214     | 9381                 | 2                 | 125                        | db BA04315.1  conserved hypothetical protein [uncultured Chloroflexus bacterium] - Expect = 4e-33                                                        | IPR004942 Dynein light chain-related; IPR004942 Dynein light chain-related                                                                                                                                                                                                              |                                                                            |
| Roadblock/LC7 domain protein                                                                               | Loklarch_43650   | contig90      | 16630                | 2                 | 123                        | db BA04315.1  conserved hypothetical protein [uncultured Chloroflexus bacterium] - Expect = 1e-24                                                        | IPR004942 Dynein light chain-related; IPR004942 Dynein light chain-related                                                                                                                                                                                                              |                                                                            |
| hypothetical protein                                                                                       | Loklarch_44990   | contig88      | 16776                | 5                 | 249                        | ref WP_008316295.1  Hypothetical protein [Wohlfahrtiimonas chitiniclastica] - Expect = 1e-10                                                             | IPR004942 Dynein light chain-related                                                                                                                                                                                                                                                    |                                                                            |
| Roadblock/LC7 domain protein                                                                               | Loklarch_54060   | contig157     | 12235                | 12                | 142                        | ref WP_008316295.1  Hypothetical protein [Wohlfahrtiimonas chitiniclastica] - Expect = 1e-10                                                             | IPR004942 Dynein light chain-related; IPR004942 Dynein light chain-related                                                                                                                                                                                                              |                                                                            |
| <b>Oligosaccharyl transferase complex proteins</b>                                                         | <b>Locus tag</b> | <b>Contig</b> | <b>Contig length</b> | <b>ORF number</b> | <b>Protein length (AA)</b> | <b>Best Blast Hits</b>                                                                                                                                   | <b>IPR domain</b>                                                                                                                                                                                                                                                                       | <b>Note</b>                                                                |
| Ribophorin 1 superfamily protein [dolichyl-diphosphooligosaccharide-protein glycosyltransferase subunit 1] | Loklarch_43710   | contig90      | 16630                | 8                 | 619                        | ref XP_003382687.1  PREDICTED: dolichyl-diphosphooligosaccharide-protein glycosyltransferase subunit 1-like [Amplimedium quezaltenense] - Expect = 3e-08 | IPR007676 Ribophorin I                                                                                                                                                                                                                                                                  | Close homologs in sediment metagenome, absent from other archaeal genomes. |
| Putative oligosaccharyltransferase complex subunit                                                         | Loklarch_24040   | contig91      | 16548                | 6                 | 173                        | ref XP_004888808.1  hypothetical protein FTG_09995 [Salpingoecus rosealis] - Expect = 1e-05                                                              | IPR021149 putative oligosaccharyl transferase complex, subunit OST3/OST6                                                                                                                                                                                                                | Close homologs in sediment metagenome, absent from other archaeal genomes. |
| Putative oligosaccharyltransferase complex subunit                                                         | Loklarch_25040   | contig188     | 10797                | 2                 | 173                        | emb CDB3393.1  oligosaccharyltransferase complex subunit [Echinococcus multilocularis] - Expect = 5e-04                                                  | IPR021149 Oligosaccharyl transferase complex, subunit OST3/OST6                                                                                                                                                                                                                         | Close homologs in sediment metagenome, absent from other archaeal genomes. |
| Putative oligosaccharyltransferase STT3 subunit                                                            | Loklarch_28460   | contig21      | 31031                | 10                | 1285                       | ref XP_002979240.1  oligosaccharyltransferase subunit STT3 [Setibacillus moellendorffii] - Expect = 3e-86                                                | IPR020674 Oligosaccharyl transferase, STT3 subunit                                                                                                                                                                                                                                      | Homologs also present in archaea.                                          |

Explanation: \*alignments and/or phylogenetic analyses are presented elsewhere in the manuscript for all proteins marked with asterisk (including all small GTPases); proteins showing highest similarities to eukaryotic homologs are highlighted in bold



Suppl. Table S7: Overview of the ribosomal proteins found in Lokiarchaeum and the LGCG14 metagenome

| Ribosomal proteins in Lokiarchaeum based on arCOG attribution |             |            |          |                                          |           |                                                 |                    |       |
|---------------------------------------------------------------|-------------|------------|----------|------------------------------------------|-----------|-------------------------------------------------|--------------------|-------|
| GeneID                                                        | length (AA) | arCOG      | COG      | COG description                          | FuncClass | Contig                                          | Contig length (bp) |       |
| Lokiarch_26970                                                | 65          | arCOG04057 |          | Ribosomal protein L38E                   | J         | Translating; ribosomal structure and biogenesis | contig3            | 57269 |
| Lokiarch_00050                                                | 243         | arCOG04289 | COG00081 | Ribosomal protein L1                     | J         | Translating; ribosomal structure and biogenesis | contig347          | 4890  |
| Lokiarch_00040                                                | 296         | arCOG04288 | COG00244 | Ribosomal protein L10 J                  | J         | Translating; ribosomal structure and biogenesis | contig347          | 4890  |
| Lokiarch_03150                                                | 102         | arCOG04113 | COG00197 | Ribosomal protein L10AE/L16              | J         | Translating; ribosomal structure and biogenesis | contig225          | 8977  |
| Lokiarch_40040                                                | 225         | arCOG04113 | COG00197 | Ribosomal protein L10AE/L16              | J         | Translating; ribosomal structure and biogenesis | contig81           | 17799 |
| Lokiarch_00060                                                | 139         | arCOG04372 | COG00080 | Ribosomal protein L11 J                  | J         | Translating; ribosomal structure and biogenesis | contig347          | 4890  |
| Lokiarch_00030                                                | 110         | arCOG04287 | COG02058 | Ribosomal protein L12E/L44/L45/RPPI/RPP2 | J         | Translating; ribosomal structure and biogenesis | contig347          | 4890  |
| Lokiarch_01040                                                | 160         | arCOG04242 | COG00102 | Ribosomal protein L13 J                  | J         | Translating; ribosomal structure and biogenesis | contig2            | 58255 |
| Lokiarch_44410                                                | 142         | arCOG04095 | COG00093 | Ribosomal protein L14 J                  | J         | Translating; ribosomal structure and biogenesis | contig290          | 6486  |
| Lokiarch_24180                                                | 142         | arCOG04095 | COG00093 | Ribosomal protein L14 J                  | J         | Translating; ribosomal structure and biogenesis | contig91           | 16548 |
| Lokiarch_10190                                                | 91          | arCOG04167 | COG02163 | Ribosomal protein L14E/LE/L27E           | J         | Translating; ribosomal structure and biogenesis | contig164          | 11945 |
| Lokiarch_44290                                                | 56          | arCOG00779 | COG00200 | Ribosomal protein L15 J                  | J         | Translating; ribosomal structure and biogenesis | contig290          | 6486  |
| Lokiarch_45130                                                | 56          | arCOG00779 | COG00200 | Ribosomal protein L15 J                  | J         | Translating; ribosomal structure and biogenesis | contig476          | 2712  |
| Lokiarch_20790                                                | 129         | arCOG00779 | COG00200 | Ribosomal protein L15 J                  | J         | Translating; ribosomal structure and biogenesis | contig595          | 1430  |
| Lokiarch_50940                                                | 195         | arCOG04209 | COG01832 | Ribosomal protein L15E J                 | J         | Translating; ribosomal structure and biogenesis | contig1            | 71539 |
| Lokiarch_44320                                                | 200         | arCOG04088 | COG00256 | Ribosomal protein L18 J                  | J         | Translating; ribosomal structure and biogenesis | contig290          | 6486  |
| Lokiarch_45160                                                | 200         | arCOG04088 | COG00256 | Ribosomal protein L18 J                  | J         | Translating; ribosomal structure and biogenesis | contig476          | 2712  |
| Lokiarch_01050                                                | 119         | arCOG00780 | COG01727 | Ribosomal protein L18E J                 | J         | Translating; ribosomal structure and biogenesis | contig2            | 58255 |
| Lokiarch_44330                                                | 152         | arCOG04089 | COG02147 | Ribosomal protein L19E J                 | J         | Translating; ribosomal structure and biogenesis | contig290          | 6486  |
| Lokiarch_45170                                                | 152         | arCOG04089 | COG02147 | Ribosomal protein L19E J                 | J         | Translating; ribosomal structure and biogenesis | contig476          | 2712  |
| Lokiarch_48250                                                | 241         | arCOG04067 | COG00090 | Ribosomal protein L2 J                   | J         | Translating; ribosomal structure and biogenesis | contig185          | 11018 |
| Lokiarch_03170                                                | 241         | arCOG04067 | COG00090 | Ribosomal protein L2 J                   | J         | Translating; ribosomal structure and biogenesis | contig58           | 21654 |
| Lokiarch_13720                                                | 76          | arCOG04175 | COG02157 | Ribosomal protein L20A (L18A)            | J         | Translating; ribosomal structure and biogenesis | contig14           | 34782 |
| Lokiarch_16870                                                | 107         | arCOG04129 | COG02139 | Ribosomal protein L21E J                 | J         | Translating; ribosomal structure and biogenesis | contig17           | 33755 |
| Lokiarch_15120                                                | 160         | arCOG04098 | COG00091 | Ribosomal protein L22 J                  | J         | Translating; ribosomal structure and biogenesis | contig465          | 2904  |
| Lokiarch_24120                                                | 160         | arCOG04098 | COG00091 | Ribosomal protein L22 J                  | J         | Translating; ribosomal structure and biogenesis | contig91           | 16548 |
| Lokiarch_50520                                                | 88          | arCOG04072 | COG00089 | Ribosomal protein L23 J                  | J         | Translating; ribosomal structure and biogenesis | contig1            | 71539 |
| Lokiarch_44400                                                | 143         | arCOG04094 | COG01988 | Ribosomal protein L24 J                  | J         | Translating; ribosomal structure and biogenesis | contig290          | 6486  |
| Lokiarch_24190                                                | 143         | arCOG04094 | COG01988 | Ribosomal protein L24 J                  | J         | Translating; ribosomal structure and biogenesis | contig91           | 16548 |
| Lokiarch_06260                                                | 61          | arCOG01950 | COG02075 | Ribosomal protein L24E J                 | J         | Translating; ribosomal structure and biogenesis | contig187          | 10803 |
| Lokiarch_19280                                                | 68          | arCOG00785 | COG00255 | Ribosomal protein L29 J                  | J         | Translating; ribosomal structure and biogenesis | contig539          | 1841  |
| Lokiarch_24150                                                | 68          | arCOG00785 | COG00255 | Ribosomal protein L29 J                  | J         | Translating; ribosomal structure and biogenesis | contig91           | 16548 |
| Lokiarch_50500                                                | 340         | arCOG04070 | COG00087 | Ribosomal protein L3 J                   | J         | Translating; ribosomal structure and biogenesis | contig1            | 71539 |
| Lokiarch_44300                                                | 176         | arCOG04086 | COG01841 | Ribosomal protein L30 J                  | J         | Translating; ribosomal structure and biogenesis | contig290          | 6486  |
| Lokiarch_45140                                                | 176         | arCOG04086 | COG01841 | Ribosomal protein L30 J                  | J         | Translating; ribosomal structure and biogenesis | contig476          | 2712  |
| Lokiarch_35610                                                | 124         | arCOG01752 | COG01911 | Ribosomal protein L30E J                 | J         | Translating; ribosomal structure and biogenesis | contig100          | 15651 |
| Lokiarch_42110                                                | 124         | arCOG01752 | COG01911 | Ribosomal protein L30E J                 | J         | Translating; ribosomal structure and biogenesis | contig310          | 5802  |
| Lokiarch_13740                                                | 151         | arCOG04473 | COG02097 | Ribosomal protein L31E J                 | J         | Translating; ribosomal structure and biogenesis | contig14           | 34782 |
| Lokiarch_44340                                                | 162         | arCOG00781 | COG01717 | Ribosomal protein L32E J                 | J         | Translating; ribosomal structure and biogenesis | contig290          | 6486  |
| Lokiarch_31720                                                | 104         | arCOG00781 | COG01717 | Ribosomal protein L32E J                 | J         | Translating; ribosomal structure and biogenesis | contig596          | 1426  |
| Lokiarch_16730                                                | 98          | arCOG04304 | COG02451 | Ribosomal protein L32AE/L33A             | J         | Translating; ribosomal structure and biogenesis | contig17           | 33755 |
| Lokiarch_20520                                                | 98          | arCOG04304 | COG02451 | Ribosomal protein L32AE/L33A             | J         | Translating; ribosomal structure and biogenesis | contig7            | 43485 |
| Lokiarch_23020                                                | 74          | arCOG04126 | COG02126 | Ribosomal protein L37E J                 | J         | Translating; ribosomal structure and biogenesis | contig485          | 2628  |
| Lokiarch_13750                                                | 54          | arCOG04177 | COG02167 | Ribosomal protein L39E J                 | J         | Translating; ribosomal structure and biogenesis | contig14           | 34782 |
| Lokiarch_50510                                                | 261         | arCOG04071 | COG00088 | Ribosomal protein L4 J                   | J         | Translating; ribosomal structure and biogenesis | contig1            | 71539 |
| Lokiarch_36520                                                | 94          | arCOG04109 | COG01631 | Ribosomal protein L44E J                 | J         | Translating; ribosomal structure and biogenesis | contig100          | 15651 |
| Lokiarch_05250                                                | 94          | arCOG04109 | COG01631 | Ribosomal protein L44E J                 | J         | Translating; ribosomal structure and biogenesis | contig129          | 5214  |
| Lokiarch_44380                                                | 198         | arCOG04092 | COG00094 | Ribosomal protein L5 J                   | J         | Translating; ribosomal structure and biogenesis | contig290          | 6486  |
| Lokiarch_24210                                                | 198         | arCOG04092 | COG00094 | Ribosomal protein L5 J                   | J         | Translating; ribosomal structure and biogenesis | contig91           | 16548 |
| Lokiarch_44350                                                | 193         | arCOG04090 | COG00097 | Ribosomal protein L6P J                  | J         | Translating; ribosomal structure and biogenesis | contig290          | 6486  |
| Lokiarch_31710                                                | 193         | arCOG04090 | COG00097 | Ribosomal protein L6P J                  | J         | Translating; ribosomal structure and biogenesis | contig596          | 1426  |
| Lokiarch_06270                                                | 90          | arCOG01751 | COG01358 | Ribosomal protein L7AE J                 | J         | Translating; ribosomal structure and biogenesis | contig187          | 10803 |
| Lokiarch_42080                                                | 104         | arCOG01751 | COG01358 | Ribosomal protein L7AE J                 | J         | Translating; ribosomal structure and biogenesis | contig124          | 9381  |
| Lokiarch_37580                                                | 96          | arCOG04351 | COG02052 | Ribosomal protein S16 J                  | J         | Translating; ribosomal structure and biogenesis | contig251          | 8914  |
| Lokiarch_12810                                                | 131         | arCOG04240 | COG00100 | Ribosomal protein S11 J                  | J         | Translating; ribosomal structure and biogenesis | contig134          | 13501 |
| Lokiarch_35580                                                | 146         | arCOG04255 | COG00048 | Ribosomal protein S12 J                  | J         | Translating; ribosomal structure and biogenesis | contig100          | 15651 |
| Lokiarch_42140                                                | 146         | arCOG04255 | COG00048 | Ribosomal protein S12 J                  | J         | Translating; ribosomal structure and biogenesis | contig310          | 5802  |
| Lokiarch_12830                                                | 164         | arCOG01722 | COG00099 | Ribosomal protein S13 J                  | J         | Translating; ribosomal structure and biogenesis | contig134          | 13501 |
| Lokiarch_02960                                                | 153         | arCOG04185 | COG00184 | Ribosomal protein S15P J                 | J         | Translating; ribosomal structure and biogenesis | contig39           | 25066 |
| Lokiarch_19260                                                | 114         | arCOG04096 | COG00186 | Ribosomal protein S17 J                  | J         | Translating; ribosomal structure and biogenesis | contig539          | 1841  |
| Lokiarch_24170                                                | 118         | arCOG04096 | COG00186 | Ribosomal protein S17 J                  | J         | Translating; ribosomal structure and biogenesis | contig91           | 16548 |
| Lokiarch_50390                                                | 65          | arCOG01885 | COG01383 | Ribosomal protein S17E J                 | J         | Translating; ribosomal structure and biogenesis | contig1            | 71539 |
| Lokiarch_15110                                                | 192         | arCOG04099 | COG00185 | Ribosomal protein S19 J                  | J         | Translating; ribosomal structure and biogenesis | contig465          | 2904  |
| Lokiarch_24110                                                | 192         | arCOG04099 | COG00185 | Ribosomal protein S19 J                  | J         | Translating; ribosomal structure and biogenesis | contig91           | 16548 |
| Lokiarch_13770                                                | 142         | arCOG01344 | COG02238 | Ribosomal protein S19E (S16A)            | J         | Translating; ribosomal structure and biogenesis | contig14           | 34782 |
| Lokiarch_39970                                                | 276         | arCOG04245 | COG00052 | Ribosomal protein S2 J                   | J         | Translating; ribosomal structure and biogenesis | contig50           | 22943 |
| Lokiarch_51720                                                | 273         | arCOG04245 | COG00052 | Ribosomal protein S2 J                   | J         | Translating; ribosomal structure and biogenesis | contig89           | 16658 |
| Lokiarch_06340                                                | 118         | arCOG04182 | COG02004 | Ribosomal protein S24E J                 | J         | Translating; ribosomal structure and biogenesis | contig187          | 10802 |
| Lokiarch_42010                                                | 118         | arCOG04182 | COG02004 | Ribosomal protein S24E J                 | J         | Translating; ribosomal structure and biogenesis | contig214          | 9381  |
| Lokiarch_09680                                                | 71          | arCOG04327 | COG04901 | Ribosomal protein S25 J                  | J         | Translating; ribosomal structure and biogenesis | contig20           | 31562 |
| Lokiarch_38480                                                | 100         | arCOG04327 | COG04901 | Ribosomal protein S25 J                  | J         | Translating; ribosomal structure and biogenesis | contig27           | 25983 |
| Lokiarch_06330                                                | 70          | arCOG04183 | COG01998 | Ribosomal protein S27AE J                | J         | Translating; ribosomal structure and biogenesis | contig187          | 10803 |
| Lokiarch_42020                                                | 70          | arCOG04183 | COG01998 | Ribosomal protein S27AE J                | J         | Translating; ribosomal structure and biogenesis | contig124          | 9381  |
| Lokiarch_36510                                                | 32          | arCOG04108 | COG02051 | Ribosomal protein S27E J                 | J         | Translating; ribosomal structure and biogenesis | contig100          | 15651 |
| Lokiarch_25970                                                | 62          | arCOG04108 | COG02051 | Ribosomal protein S27E J                 | J         | Translating; ribosomal structure and biogenesis | contig91           | 2552  |
| Lokiarch_06280                                                | 84          | arCOG04314 | COG02053 | Ribosomal protein S28E/S33 J             | J         | Translating; ribosomal structure and biogenesis | contig187          | 10803 |
| Lokiarch_42070                                                | 87          | arCOG04314 | COG02053 | Ribosomal protein S28E/S33 J             | J         | Translating; ribosomal structure and biogenesis | contig214          | 9381  |
| Lokiarch_19290                                                | 267         | arCOG04097 | COG00092 | Ribosomal protein S3 J                   | J         | Translating; ribosomal structure and biogenesis | contig539          | 1841  |
| Lokiarch_24140                                                | 264         | arCOG04097 | COG00092 | Ribosomal protein S3 J                   | J         | Translating; ribosomal structure and biogenesis | contig91           | 16548 |
| Lokiarch_37880                                                | 69          | arCOG04293 | COG04919 | Ribosomal protein S30 J                  | J         | Translating; ribosomal structure and biogenesis | contig198          | 10131 |
| Lokiarch_10570                                                | 69          | arCOG04293 | COG04919 | Ribosomal protein S30 J                  | J         | Translating; ribosomal structure and biogenesis | contig52           | 22764 |
| Lokiarch_02950                                                | 249         | arCOG04186 | COG01890 | Ribosomal protein S3AE J                 | J         | Translating; ribosomal structure and biogenesis | contig39           | 25066 |
| Lokiarch_12820                                                | 173         | arCOG04239 | COG00522 | Ribosomal protein S4 or related protein  | J         | Translating; ribosomal structure and biogenesis | contig134          | 13501 |
| Lokiarch_44390                                                | 252         | arCOG04093 | COG01471 | Ribosomal protein S4E J                  | J         | Translating; ribosomal structure and biogenesis | contig290          | 6486  |
| Lokiarch_24200                                                | 252         | arCOG04093 | COG01471 | Ribosomal protein S4E J                  | J         | Translating; ribosomal structure and biogenesis | contig91           | 16548 |
| Lokiarch_44310                                                | 206         | arCOG04087 | COG00098 | Ribosomal protein S5 J                   | J         | Translating; ribosomal structure and biogenesis | contig290          | 6486  |
| Lokiarch_45150                                                | 205         | arCOG04087 | COG00098 | Ribosomal protein S5 J                   | J         | Translating; ribosomal structure and biogenesis | contig476          | 2712  |
| Lokiarch_26190                                                | 135         | arCOG01946 | COG02125 | Ribosomal protein S6E (S10)              | J         | Translating; ribosomal structure and biogenesis | contig130          | 13861 |
| Lokiarch_06250                                                | 135         | arCOG01946 | COG02125 | Ribosomal protein S6E (S10)              | J         | Translating; ribosomal structure and biogenesis | contig187          | 10803 |
| Lokiarch_36570                                                | 206         | arCOG04254 | COG00049 | Ribosomal protein S7 J                   | J         | Translating; ribosomal structure and biogenesis | contig100          | 15651 |
| Lokiarch_42150                                                | 206         | arCOG04254 | COG00049 | Ribosomal protein S7 J                   | J         | Translating; ribosomal structure and biogenesis | contig310          | 5802  |
| Lokiarch_44360                                                | 128         | arCOG04091 | COG00096 | Ribosomal protein S8 J                   | J         | Translating; ribosomal structure and biogenesis | contig290          | 6486  |
| Lokiarch_31700                                                | 128         | arCOG04091 | COG00096 | Ribosomal protein S8 J                   | J         | Translating; ribosomal structure and biogenesis | contig596          | 1426  |
| Lokiarch_32730                                                | 177         | arCOG04154 | COG02007 | Ribosomal protein S8E J                  | J         | Translating; ribosomal structure and biogenesis | contig313          | 5698  |
| Lokiarch_41110                                                | 127         | arCOG04154 | COG02007 | Ribosomal protein S8E J                  | J         | Translating; ribosomal structure and biogenesis | contig459          | 2996  |
| Lokiarch_01030                                                | 137         | arCOG04243 | COG00103 | Ribosomal protein S9 J                   | J         | Translating; ribosomal structure and biogenesis | contig2            | 58255 |

  

| Ribosomal proteins in Lokiarchaeum starting with alternative start codons (identified by tblastn) |             |            |          |                          |           |                                                 |        |                    |
|---------------------------------------------------------------------------------------------------|-------------|------------|----------|--------------------------|-----------|-------------------------------------------------|--------|--------------------|
| GeneID                                                                                            | length (AA) | arCOG      | COG      | COG description          | FuncClass | predicted start codon                           | Contig | Contig length (bp) |
| Lokiarch_26975                                                                                    | 54          | arCOG04049 | COG01552 | Ribosomal protein L40E J | J         | Translating; ribosomal structure and biogenesis | GTG    | 57269              |
| Lokiarch_10175                                                                                    | 90          | arCOG04168 | COG02174 | Ribosomal protein L34E J | J         | Translating; ribosomal structure and biogenesis | ATT    | contig164<br>11945 |
| Lokiarch_44375                                                                                    | 50          | arCOG00782 | COG00199 | Ribosomal protein S14 J  | J         | Translating; ribosomal structure and biogenesis | ATT    | contig290<br>6486  |
| Lokiarch_24225                                                                                    | 50          | arCOG00782 | COG00199 | Ribosomal protein S14 J  | J         | Translating; ribosomal structure and biogenesis | ATT    | contig91<br>16548  |

  

| Ribosomal proteins present in LGCG14 metagenome and assigned to Lokiarchaeum, but not part of the bin due to coverage filtering criteria |             |            |          |                          |           |                                                                       |                                                        |              |
|------------------------------------------------------------------------------------------------------------------------------------------|-------------|------------|----------|--------------------------|-----------|-----------------------------------------------------------------------|--------------------------------------------------------|--------------|
| GeneID                                                                                                                                   | length (AA) | arCOG      | COG      | COG description          | FuncClass | method; e-value; (tblastn: start; stop; frame; predicted start codon) | Phyml-bin                                              | notes        |
| LCG14_0502170                                                                                                                            | 198         | arCOG01013 | COG04352 | Ribosomal protein L13E J | J         | Translating; ribosomal structure and biogenesis                       | psiblast; 5e-07                                        | Lokiarchaeum |
| LCG14_1193320                                                                                                                            | 201         | arCOG01013 | COG04352 | Ribosomal protein L13E J | J         | Translating; ribosomal structure and biogenesis                       | psiblast; 9e-07                                        | Lok2/3       |
| LCG14_0804220                                                                                                                            | 202         | arCOG01013 | COG04352 | Ribosomal protein L13E J | J         | Translating; ribosomal structure and biogenesis                       | psiblast; 1e-05                                        | Lokiarchaeum |
| LCG14_0916275                                                                                                                            | 89          | arCOG04305 | COG04830 | Ribosomal protein S26E J | J         | Translating; ribosomal structure and biogenesis                       | tblastn (q; A. hospitalis); 9e-15; 5472; 5206; -3; ATT | Lokiarchaeum |
| LCG14_0657145                                                                                                                            | 92          | arCOG04305 | COG04830 | Ribosomal protein S26E J | J         | Translating; ribosomal structure and biogenesis                       | tblastn (q; A. hospitalis); 2e-10; 657; 436; -2; ATT   | Lokiarchaeum |

  

| Novel eukarya-specific ribosomal proteins potentially present in Lokiarchaeum |             |       |         |                                                       |           |                             |           |                    |
|-------------------------------------------------------------------------------|-------------|-------|---------|-------------------------------------------------------|-----------|-----------------------------|-----------|--------------------|
| GeneID                                                                        | length (AA) | arCOG | COG     | COG description                                       | FuncClass | notes                       | Contig    | Contig length (bp) |
| Lokiarch_30160                                                                | 103         | -     | KOG4334 | putative homolog of eukaryotic ribosomal protein L22e | J         | not found in archaea so far | contig150 | 12534              |

Suppl. Table S8: Distribution of Archaea- /Eukarya-specific ribosomal proteins in different archaeal lineages based on arCOG assignments.

| Species                              | Order and/or Phylum                | arCOG04108 | arCOG04126 | arCOG01752 | arCOG04167 | arCOG04168 | arCOG04327 | arCOG04305 | arCOG04293 | arCOG04175     | arCOG04304 | arCOG04057 | arCOG01013 | arCOG06624 | KOG3434 |
|--------------------------------------|------------------------------------|------------|------------|------------|------------|------------|------------|------------|------------|----------------|------------|------------|------------|------------|---------|
|                                      |                                    | S27ae      | L37e       | L30e       | L14e       | L34e       | S25e       | S26e       | S30e       | L18ae/L20e/LXa | L35ae      | L38e       | L13e       | L41e       | L22e    |
| <i>Thermofilum pendens</i>           | Thermoproteales (Crenarchaeota)    | ◆          | ◆          | ◆          | ◆          | ◆          | ◆          | ◆          | ◆          | ◆              | ◆          | ◆          | ◆          | ◆          |         |
| <i>Geoarchaeon NAG1</i>              | Thermoproteales (Crenarchaeota)    | ◆          | ◆          | ◆          | ◆          | ◆          | ◆          | ◆          | ◆          | ◆              | ◆          | ◆          | ◆          | ◆          |         |
| <i>Thermoproteus neutrophilus</i>    | Thermoproteales (Crenarchaeota)    | ◆          | ◆          | ◆          | ◆          | ◆          | ◆          | ◆          | ◆          | ◆              | ◆          | ◆          | ◆          | ◆          |         |
| <i>Pyrobaculum aerophilum</i>        | Thermoproteales (Crenarchaeota)    | ◆          | ◆          | ◆          | ◆          | ◆          | ◆          | ◆          | ◆          | ◆              | ◆          | ◆          | ◆          | ◆          |         |
| <i>Pyrobaculum arsenaticum</i>       | Thermoproteales (Crenarchaeota)    | ◆          | ◆          | ◆          | ◆          | ◆          | ◆          | ◆          | ◆          | ◆              | ◆          | ◆          | ◆          | ◆          |         |
| <i>Pyrobaculum calidifontis</i>      | Thermoproteales (Crenarchaeota)    | ◆          | ◆          | ◆          | ◆          | ◆          | ◆          | ◆          | ◆          | ◆              | ◆          | ◆          | ◆          | ◆          |         |
| <i>Pyrobaculum islandicum</i>        | Thermoproteales (Crenarchaeota)    | ◆          | ◆          | ◆          | ◆          | ◆          | ◆          | ◆          | ◆          | ◆              | ◆          | ◆          | ◆          | ◆          |         |
| <i>Caldwriga maquilingensis</i>      | Thermoproteales (Crenarchaeota)    | ◆          | ◆          | ◆          | ◆          | ◆          | ◆          | ◆          | ◆          | ◆              | ◆          | ◆          | ◆          | ◆          |         |
| <i>Thermosphaera aggregans</i>       | Desulfurococcales (Crenarchaeota)  | ◆          | ◆          | ◆          | ◆          | ◆          | ◆          | ◆          | ◆          | ◆              | ◆          | ◆          | ◆          | ◆          |         |
| <i>Desulfurococcus kamchatkensis</i> | Desulfurococcales (Crenarchaeota)  | ◆          | ◆          | ◆          | ◆          | ◆          | ◆          | ◆          | ◆          | ◆              | ◆          | ◆          | ◆          | ◆          |         |
| <i>Acidilobus saccharovorans</i>     | Desulfurococcales (Crenarchaeota)  | ◆          | ◆          | ◆          | ◆          | ◆          | ◆          | ◆          | ◆          | ◆              | ◆          | ◆          | ◆          | ◆          |         |
| <i>Aeropyrum pernix</i>              | Desulfurococcales (Crenarchaeota)  | ◆          | ◆          | ◆          | ◆          | ◆          | ◆          | ◆          | ◆          | ◆              | ◆          | ◆          | ◆          | ◆          |         |
| <i>Hyperthermus butylicus</i>        | Desulfurococcales (Crenarchaeota)  | ◆          | ◆          | ◆          | ◆          | ◆          | ◆          | ◆          | ◆          | ◆              | ◆          | ◆          | ◆          | ◆          |         |
| <i>Ignicoccus hospitalis</i>         | Desulfurococcales (Crenarchaeota)  | ◆          | ◆          | ◆          | ◆          | ◆          | ◆          | ◆          | ◆          | ◆              | ◆          | ◆          | ◆          | ◆          |         |
| <i>Staphylothermus hellenicus</i>    | Desulfurococcales (Crenarchaeota)  | ◆          | ◆          | ◆          | ◆          | ◆          | ◆          | ◆          | ◆          | ◆              | ◆          | ◆          | ◆          | ◆          |         |
| <i>Metallosphaera sedula</i>         | Sulfolobales (Crenarchaeota)       | ◆          | ◆          | ◆          | ◆          | ◆          | ◆          | ◆          | ◆          | ◆              | ◆          | ◆          | ◆          | ◆          |         |
| <i>Sulfolobus acidocaldarius</i>     | Sulfolobales (Crenarchaeota)       | ◆          | ◆          | ◆          | ◆          | ◆          | ◆          | ◆          | ◆          | ◆              | ◆          | ◆          | ◆          | ◆          |         |
| <i>Sulfolobus islandicus YN1551</i>  | Sulfolobales (Crenarchaeota)       | ◆          | ◆          | ◆          | ◆          | ◆          | ◆          | ◆          | ◆          | ◆              | ◆          | ◆          | ◆          | ◆          |         |
| <i>Sulfolobus solfataricus</i>       | Sulfolobales (Crenarchaeota)       | ◆          | ◆          | ◆          | ◆          | ◆          | ◆          | ◆          | ◆          | ◆              | ◆          | ◆          | ◆          | ◆          |         |
| <i>Sulfolobus tokodaii</i>           | Sulfolobales (Crenarchaeota)       | ◆          | ◆          | ◆          | ◆          | ◆          | ◆          | ◆          | ◆          | ◆              | ◆          | ◆          | ◆          | ◆          |         |
| <i>Korarchaeum cryptofilum</i>       | Korarchaeota                       | ◆          | ◆          | ◆          | ◆          | ◆          | ◆          | ◆          | ◆          | ◆              | ◆          | ◆          | ◆          | ◆          |         |
| <i>Nitrososphaera gargensis</i>      | Thaumarchaeota                     | ◆          | ◆          | ◆          | ◆          | ◆          | ◆          | ◆          | ◆          | ◆              | ◆          | ◆          | ◆          | ◆          |         |
| <i>Caldiararchaeum subterraneum</i>  | Thaum/ [Aig]archaeota              | ◆          | ◆          | ◆          | ◆          | ◆          | ◆          | ◆          | ◆          | ◆              | ◆          | ◆          | ◆          | ◆          |         |
| <i>Lokiarchaeum</i>                  | Lokiarchaeota                      | ◆          | ◆          | ◆          | ◆          | ◆          | ◆          | ◆          | ◆          | ◆              | ◆          | ◆          | ◆          | ◆          | ◆       |
| <i>Nanoarchaeum equitans</i>         | Nanoarchaeota                      | ◆          | ◆          | ◆          | ◆          | ◆          | ◆          | ◆          | ◆          | ◆              | ◆          | ◆          | ◆          | ◆          | ◆       |
| <i>Thermococcus gammatolerans</i>    | Thermococcales (Euryarchaeota)     | ◆          | ◆          | ◆          | ◆          | ◆          | ◆          | ◆          | ◆          | ◆              | ◆          | ◆          | ◆          | ◆          | ◆       |
| <i>Methanobrevibacter smithii</i>    | Methanobacteriales (Euryarchaeota) | ◆          | ◆          | ◆          | ◆          | ◆          | ◆          | ◆          | ◆          | ◆              | ◆          | ◆          | ◆          | ◆          | ◆       |
| <i>Methanococcus jannaschii</i>      | Methanococcales (Euryarchaeota)    | ◆          | ◆          | ◆          | ◆          | ◆          | ◆          | ◆          | ◆          | ◆              | ◆          | ◆          | ◆          | ◆          | ◆       |
| <i>Methanopyrus kandleri</i>         | Methanopyrales (Euryarchaeota)     | ◆          | ◆          | ◆          | ◆          | ◆          | ◆          | ◆          | ◆          | ◆              | ◆          | ◆          | ◆          | ◆          | ◆       |
| <i>Acidilipifundum boonei</i>        | (Euryarchaeota)                    | ◆          | ◆          | ◆          | ◆          | ◆          | ◆          | ◆          | ◆          | ◆              | ◆          | ◆          | ◆          | ◆          | ◆       |
| <i>Archaeoglobus profundus</i>       | Archaeoglobales (Euryarchaeota)    | ◆          | ◆          | ◆          | ◆          | ◆          | ◆          | ◆          | ◆          | ◆              | ◆          | ◆          | ◆          | ◆          | ◆       |
| <i>Methanoregula boonei</i>          | Methanomicrobiales (Euryarchaeota) | ◆          | ◆          | ◆          | ◆          | ◆          | ◆          | ◆          | ◆          | ◆              | ◆          | ◆          | ◆          | ◆          | ◆       |
| <i>Methanocella paludicola</i>       | Methanocellales (Euryarchaeota)    | ◆          | ◆          | ◆          | ◆          | ◆          | ◆          | ◆          | ◆          | ◆              | ◆          | ◆          | ◆          | ◆          | ◆       |
| <i>Methanosarcina acetivorans</i>    | Methanosarcinales (Euryarchaeota)  | ◆          | ◆          | ◆          | ◆          | ◆          | ◆          | ◆          | ◆          | ◆              | ◆          | ◆          | ◆          | ◆          | ◆       |
| <i>Thermoplasma acidophilum</i>      | Thermoplasmatales (Euryarchaeota)  | ◆          | ◆          | ◆          | ◆          | ◆          | ◆          | ◆          | ◆          | ◆              | ◆          | ◆          | ◆          | ◆          | ◆       |
| <i>Haloarcula marismortui</i>        | Halobacteriales (Euryarchaeota)    | ◆          | ◆          | ◆          | ◆          | ◆          | ◆          | ◆          | ◆          | ◆              | ◆          | ◆          | ◆          | ◆          | ◆       |
| <b>Eukaryotes</b>                    |                                    | ◆          | ◆          | ◆          | ◆          | ◆          | ◆          | ◆          | ◆          | ◆              | ◆          | ◆          | ◆          | ◆          | ◆       |

Suppl. Table S9: Annotation of important lokiarchaeal informational processing genes

| Gene                                                                                                                     | Contig         | Contig length | ORF number | length (AA) | Top Blast Hit* | arCOG                                                                                                                     | COG        | COG description | Function                                                                         | comment |                                       |                                                                                                        |
|--------------------------------------------------------------------------------------------------------------------------|----------------|---------------|------------|-------------|----------------|---------------------------------------------------------------------------------------------------------------------------|------------|-----------------|----------------------------------------------------------------------------------|---------|---------------------------------------|--------------------------------------------------------------------------------------------------------|
| DNA-directed RNA polymerase                                                                                              | Contig         | Contig length | ORF number | length (AA) | Top Blast Hit* | arCOG                                                                                                                     | COG        | COG description | Function                                                                         | comment |                                       |                                                                                                        |
| DNA-directed RNA polymerase, subunit A'                                                                                  | Lokiarch_36620 | contig100     | 15651      | 12          | 404            | ref WP_012185255.1  DNA-directed RNA polymerase subunit A' [Calditerrivulus maquilgensis] - Expect = 3e-110 (44%)         | arCOG04256 | COG0086         | DNA-directed RNA polymerase subunit A'                                           | K       | Transcription                         | 95% identity to each other                                                                             |
| DNA-directed RNA polymerase, subunit A'                                                                                  | Lokiarch_42100 | contig310     | 5802       | 2           | 402            | ref WP_012185255.1  DNA-directed RNA polymerase subunit A' [Calditerrivulus maquilgensis] - Expect = 3e-110 (44%)         | arCOG04256 | COG0086         | DNA-directed RNA polymerase subunit A'                                           | K       | Transcription                         |                                                                                                        |
| DNA-directed RNA polymerase, subunit A'                                                                                  | Lokiarch_36630 | contig100     | 15651      | 13          | 990            | ref WP_023991383.1  DNA-directed RNA polymerase subunit A' [Methanobacterium sp. MB3] - Expect = 0.0 (50%)                | arCOG04257 | COG0086         | DNA-directed RNA polymerase subunit A'                                           | K       | Transcription                         |                                                                                                        |
| partial DNA-directed RNA polymerase, subunit A'                                                                          | Lokiarch_42090 | contig310     | 5802       | 1           | 151            | ref WP_013799670.1  DNA-directed RNA polymerase subunit A' (Methanotortrix igneus) - Expect = 2e-17 (61%)                 | arCOG04257 | COG0086         | DNA-directed RNA polymerase subunit A'                                           | K       | Transcription                         | ca. 92% identity to each other                                                                         |
| partial DNA-directed RNA polymerase, subunit A'                                                                          | Lokiarch_24950 | contig474     | 2743       | 1           | 852            | ref WP_015124245.1  DNA-directed RNA polymerase subunit A' [Methanohalobium evestigatum] - Expect = 0.0 (56%)             | arCOG04257 | COG0086         | DNA-directed RNA polymerase subunit A'                                           | K       | Transcription                         | 99% identity to each other                                                                             |
| DNA-directed RNA polymerase, subunit B                                                                                   | Lokiarch_29070 | contig291     | 6442       | 3           | 1122           | ref WP_00999078.1  DNA-directed RNA polymerase subunit B [Sulfolobus solfataricus] - Expect = 0.0 (57%)                   | arCOG1762  | COG0085         | DNA-directed RNA polymerase subunit B                                            | K       | Transcription                         |                                                                                                        |
| DNA-directed RNA polymerase, subunit B                                                                                   | Lokiarch_03330 | contig58      | 21634      | 4           | 1127           | ref WP_00999078.1  DNA-directed RNA polymerase subunit B [Sulfolobus solfataricus] - Expect = 0.0 (57%)                   | arCOG1762  | COG0085         | DNA-directed RNA polymerase subunit B                                            | K       | Transcription                         |                                                                                                        |
| DNA-directed RNA polymerase, subunit D                                                                                   | Lokiarch_01060 | contig2       | 58255      | 23          | 277            | ref WP_013143934.1  DNA-directed RNA polymerase subunit D [Staphylothermus helveticus] - Expect = 1e-64 (41%)             | arCOG04241 | COG0202         | DNA-directed RNA polymerase subunit D                                            | K       | Transcription                         | 98% identity to each other                                                                             |
| DNA-directed RNA polymerase, subunit E'                                                                                  | Lokiarch_06370 | contig187     | 10803      | 15          | 199            | ref WP_014788599.1  DNA-directed RNA polymerase subunit E' [Thermococcus sp. CL1] - Expect = 3e-62 (43%)                  | arCOG00675 | COG1095         | DNA-directed RNA polymerase, subunit E'                                          | K       | Transcription                         |                                                                                                        |
| DNA-directed RNA polymerase, subunit E'                                                                                  | Lokiarch_41980 | contig214     | 9381       | 6           | 199            | ref WP_014788599.1  DNA-directed RNA polymerase subunit E' [Thermococcus sp. CL1] - Expect = 7e-58 (46%)                  | arCOG00675 | COG1095         | DNA-directed RNA polymerase, subunit E'                                          | K       | Transcription                         |                                                                                                        |
| DNA-directed RNA polymerase, subunit E'                                                                                  | Lokiarch_41990 | contig214     | 9381       | 7           | 62             | ref WP_015124245.1  DNA-directed RNA polymerase subunit E' [Methanohalobium evestigatum] - Expect = 9e-15 (55%)           | arCOG04077 | COG0203         | Transcription elongation factor Sp4/RpoE2, zinc finger protein                   | K       | Transcription                         | 94% identity to each other                                                                             |
| DNA-directed RNA polymerase, subunit E'                                                                                  | Lokiarch_06360 | contig187     | 10803      | 14          | 62             | ref WP_015124245.1  DNA-directed RNA polymerase subunit E' [Methanohalobium evestigatum] - Expect = 1e-14 (55%)           | arCOG04077 | COG0203         | Transcription elongation factor Sp4/RpoE2, zinc finger protein                   | K       | Transcription                         |                                                                                                        |
| DNA-directed RNA polymerase, subunit F                                                                                   | Lokiarch_16880 | contig17      | 33755      | 24          | 121            | gb AE99443.1  DNA-directed RNA polymerase subunit F (pof) [Thermoplasma volcanum] - Expect = 3e-09 (37%)                  | arCOG1016  | COG0160         | DNA-directed RNA polymerase, subunit F (pof)                                     | K       | Transcription                         | 95% identity to each other                                                                             |
| DNA-directed RNA polymerase, subunit H                                                                                   | Lokiarch_29060 | contig291     | 6442       | 2           | 85             | sp P31815.1  RPOH_THICE RecName: Full=DNA-directed RNA polymerase subunit H [Thermococcus celer] - Expect = 3e-16 (44%)   | arCOG04258 | COG0202         | DNA-directed RNA polymerase, subunit H, RpoH/RPB5                                | K       | Transcription                         |                                                                                                        |
| DNA-directed RNA polymerase, subunit H                                                                                   | Lokiarch_03340 | contig58      | 21634      | 5           | 85             | sp P31815.1  RPOH_THICE RecName: Full=DNA-directed RNA polymerase subunit H [Thermococcus celer] - Expect = 3e-16 (44%)   | arCOG04258 | COG0202         | DNA-directed RNA polymerase, subunit H, RpoH/RPB5                                | K       | Transcription                         |                                                                                                        |
| DNA-directed RNA polymerase, subunit K                                                                                   | Lokiarch_17320 | contig636     | 1193       | 2           | 100            | ref WP_01751965.1  DNA-directed RNA polymerase subunit K [Thermophilum pendens] - Expect = 9e-19 (50%)                    | arCOG1268  | COG1758         | DNA-directed RNA polymerase, subunit K/omega                                     | K       | Transcription                         | significant domain hit but low sequence conservation (ca. 30%), start codon might be wrongly predicted |
| putative DNA-directed RNA polymerase, subunit L                                                                          | Lokiarch_28530 | contig23      | 31031      | 17          | 164            | ref WP_011033344.1  DNA-directed RNA polymerase subunit L [Methanocaldococcus jaspideus] - Expect = 4e-04 (42%)           | arCOG04111 | COG1761         | DNA-directed RNA polymerase, subunit L                                           | K       | Transcription                         |                                                                                                        |
| hypothetical protein with partial similarity to transcription elongation factor S/DNA-directed RNA polymerase, subunit M | Lokiarch_01920 | contig137     | 13309      | 6           | 61             | ref WP_011927548.1  DNA-directed RNA polymerase subunit M [Methanocaldococcus jaspideus] - Expect = 9e-15 (55%)           | arCOG00579 | COG1594         | DNA-directed RNA polymerase, subunit M/Transcription elongation factor TFIIS     | K       | Transcription                         | 92% identity between each other                                                                        |
| hypothetical protein with partial similarity to transcription elongation factor S/DNA-directed RNA polymerase, subunit M | Lokiarch_03010 | contig39      | 25066      | 28          | 83             | ref WP_01572558.1  DNA-directed RNA polymerase subunit M [Methanocaldococcus vannielii] - Expect = 9e-06 (42%)            | arCOG00579 | COG1594         | DNA-directed RNA polymerase, subunit M/Transcription elongation factor TFIIS     | K       | Transcription                         |                                                                                                        |
| hypothetical protein with partial similarity to transcription elongation factor S/DNA-directed RNA polymerase, subunit M | Lokiarch_13080 | contig166     | 11690      | 7           | 61             | ref WP_018154590.1  DNA-directed RNA polymerase subunit M [Methanocaldococcus thermophilus] - Expect = 4e-04 (42%)        | arCOG00579 | COG1594         | DNA-directed RNA polymerase, subunit M/Transcription elongation factor TFIIS     | K       | Transcription                         |                                                                                                        |
| putative DNA-directed RNA polymerase, subunit M/Transcription elongation factor TFIIS                                    | Lokiarch_25960 | contig491     | 2557       | 4           | 114            | ref WP_01328916.1  DNA-directed RNA polymerase subunit M [Thermoplasma aggregans] - Expect = 5e-19 (43%)                  | arCOG00579 | COG1594         | DNA-directed RNA polymerase, subunit M/Transcription elongation factor TFIIS     | K       | Transcription                         | 92% identity between each other                                                                        |
| putative DNA-directed RNA polymerase, subunit M/Transcription elongation factor TFIIS                                    | Lokiarch_30140 | contig150     | 12534      | 8           | 116            | gb EW60779.1  Transcription termination factor Tfs [Sulfolobus solfataricus] - Expect = 8e-16 (42%)                       | arCOG00579 | COG1594         | DNA-directed RNA polymerase, subunit M/Transcription elongation factor TFIIS     | K       | Transcription                         |                                                                                                        |
| DNA-directed RNA polymerase, subunit N                                                                                   | Lokiarch_26180 | contig130     | 13861      | 1           | 66             | emb CD526753.1  DNA-directed RNA polymerases I, II, and III [Hymanopsis micromassa] - Expect = 2e-19 (56%)                | arCOG04244 | COG1644         | DNA-directed RNA polymerase, subunit N (RpoN/RPB10)                              | K       | Transcription                         | 92% identity between each other                                                                        |
| DNA-directed RNA polymerase, subunit P                                                                                   | Lokiarch_34120 | contig6       | 43995      | 29          | 49             | gb AAK9096.1  AF393466_34 Znr-ribon protein [uncultured crenarchaeote 744A] - Expect = 4e-06 (53%)                        | arCOG04341 | COG1996         | DNA-directed RNA polymerase, subunit P (RpoP/RPB12) (contains C4-type Zn-finger) | K       | Transcription                         |                                                                                                        |
| <b>DNA polymerases</b>                                                                                                   |                |               |            |             |                |                                                                                                                           |            |                 |                                                                                  |         |                                       |                                                                                                        |
| Product                                                                                                                  | Contig         | Contig length | ORF number | length (AA) | Top Blast Hit* | arCOG                                                                                                                     | COG        | COG description | Function                                                                         | comment |                                       |                                                                                                        |
| DNA polymerase I (B1-family)                                                                                             | Lokiarch_39310 | contig108     | 15300      | 5           | 981            | dbj BA95222.1  DNA-directed DNA polymerase B [Uncultured Candidatus Nitrososodus sp.] - Expect = 0.0 (40%)                | arCOG00328 | COG0047         | DNA polymerase elongation subunit (family B)                                     | L       | Replication; recombination and repair | see Makarova et al., 2014 for classification archaeal DNA polymerases                                  |
| putative DNA polymerase (inactivated B2-family)                                                                          | Lokiarch_35900 | contig22      | 31076      | 2           | 804            | ref WP_010020238.1  DNA polymerase B [Candidatus Nitrososodus gergensis] - Expect = 2e-125 (43%)                          | arCOG00329 | COG0047         | DNA polymerase elongation subunit (family B), inactivated                        | L       | Replication; recombination and repair | "N. gergensis/Leptosirillum-like"                                                                      |
| DNA polymerase D (II), large subunit                                                                                     | Lokiarch_35660 | contig261     | 7637       | 3           | 1153           | ref WP_004068996.1  DNA polymerase II [Thermococcus litoralis] - Expect = 0.0 (44%)                                       | arCOG04447 | COG1933         | Archaeal DNA polymerase II, large subunit                                        | L       | Replication; recombination and repair | 92% identity between each other                                                                        |
| DNA polymerase D (II), large subunit                                                                                     | Lokiarch_04310 | contig286     | 6610       | 3           | 1153           | ref WP_014405073.1  DNA polymerase II [Methanocaldococcus] - Expect = 0.0 (45%)                                           | arCOG04447 | COG1933         | Archaeal DNA polymerase II, large subunit                                        | L       | Replication; recombination and repair |                                                                                                        |
| DNA polymerase D (II), small subunit                                                                                     | Lokiarch_35650 | contig261     | 7637       | 2           | 586            | ref WP_019262706.1  DNA polymerase II [Methanorevbacter smithii] - Expect = 4e-90 (83%)                                   | arCOG04455 | COG1933         | Archaeal DNA polymerase II, small subunit/DNA polymerase delta, subunit B        | L       | Replication; recombination and repair |                                                                                                        |
| DNA polymerase D (II), small subunit                                                                                     | Lokiarch_04300 | contig286     | 6610       | 2           | 586            | ref WP_019262706.1  DNA polymerase II [Methanorevbacter smithii] - Expect = 3e-91 (83%)                                   | arCOG04455 | COG1933         | Archaeal DNA polymerase II, small subunit/DNA polymerase delta, subunit B        | L       | Replication; recombination and repair |                                                                                                        |
| <b>Replication</b>                                                                                                       |                |               |            |             |                |                                                                                                                           |            |                 |                                                                                  |         |                                       |                                                                                                        |
| Product                                                                                                                  | Contig         | Contig length | ORF number | length (AA) | Top Blast Hit* | arCOG                                                                                                                     | COG        | COG description | Function                                                                         | comment |                                       |                                                                                                        |
| ERC4-like helicase/Hef nuclease                                                                                          | Lokiarch_33440 | contig116     | 14764      | 2           | 771            | ref WP_010885957.1  DEAD/DEAH box helicase [Pyrococcus horikoshii] - Expect = 0.0 (44%)                                   | arCOG00872 | COG1111         | ERC4-like helicase                                                               | L       | Replication; recombination and repair | 92.89 % identity to lokiar_33440                                                                       |
| ERC4-like helicase/Hef nuclease                                                                                          | Lokiarch_04610 | contig403     | 3729       | 1           | 717            | ref WP_010885957.1  DEAD/DEAH box helicase [Pyrococcus horikoshii] - Expect = 0.0 (43%)                                   | arCOG00872 | COG1111         | ERC4-like helicase                                                               | L       | Replication; recombination and repair |                                                                                                        |
| putative ERC4-like helicase/Hef nuclease                                                                                 | Lokiarch_40920 | contig79      | 18091      | 8           | 717            | ref WP_011249972.1  DEAD/DEAH box helicase [Thermococcus kodakarensis] - Expect = 1e-115 (39%)                            | arCOG00872 | COG1111         | ERC4-like helicase                                                               | L       | Replication; recombination and repair |                                                                                                        |
| ERC4-like nuclease                                                                                                       | Lokiarch_11770 | contig302     | 6079       | 4           | 251            | DEAD/DEAH box helicase [Pyrococcus furiosus] - Expect = 4e-30 (39%), only ERC4 domain                                     | arCOG04206 | COG1948         | ERC4-type nuclease                                                               | L       | Replication; recombination and repair | no significant hit in nr, very divergent from both other archaea and eukaryotes                        |
| putative GINS (23)-domain protein                                                                                        | Lokiarch_45390 | contig8       | 42635      | 16          | 185            | -                                                                                                                         | arCOG00552 | COG1711         | DNA replication initiation complex subunit, GINS23 family                        | L       | Replication; recombination and repair |                                                                                                        |
| putative DNA replication initiation complex subunit, GINS35 family                                                       | Lokiarch_28600 | contig23      | 31031      | 24          | 239            | ref WP_013483089.1  Hypothetical protein [Cenarchaeum symbiosum] - Expect = 5e-05 (41%, partial overlap only)             | arCOG00551 | COG1711         | DNA replication initiation complex subunit, GINS35 family                        | L       | Replication; recombination and repair | 92% identity between each other                                                                        |
| DNA primase small subunit PriS                                                                                           | Lokiarch_28610 | contig23      | 31031      | 25          | 427            | ref WP_01458594.1  DNA primase [Thermophilum carboxydiphthosus 1505] - Expect = 1e-71 (36%)                               | arCOG04110 | COG1467         | Eukaryotic-type DNA primase, catalytic (small) subunit                           | L       | Replication; recombination and repair |                                                                                                        |
| DNA primase large subunit PriL                                                                                           | Lokiarch_28620 | contig23      | 31031      | 26          | 396            | ref WP_01458594.1  DNA primase [Methanosaeta harundinacea] - Expect = 9e-28 (27%)                                         | arCOG03013 | COG20219        | Eukaryotic-type DNA primase, large subunit                                       | L       | Replication; recombination and repair |                                                                                                        |
| PCNA                                                                                                                     | Lokiarch_25940 | contig491     | 2557       | 2           | 266            | ref WP_004424199.1  DNA polymerase sliding clamp [Pyrococcus sp. NA2] - Expect = 6e-34 (33%)                              | arCOG00488 | COG0592         | DNA polymerase sliding clamp subunit (PCNA homolog)                              | L       | Replication; recombination and repair | 92% identity between each other                                                                        |
| DNA primase (bacterial type, DnaG)                                                                                       | Lokiarch_13690 | contig14      | 34782      | 10          | 394            | ref NP_070724.1  DNA primase [Archaeoglobus fulgidus DSM 4304] - Expect = 3e-97 (47%)                                     | arCOG04281 | COG00358        | DNA primase (bacterial type)                                                     | L       | Replication; recombination and repair |                                                                                                        |
| ORC1-type DNA replication protein                                                                                        | Lokiarch_29380 | contig640     | 1175       | 1           | 382            | ref WP_012036099.1  cell division control protein Cdc6 [Methanocella arvoryzae] - Expect = 2e-97 (45%)                    | arCOG00467 | COG15474        | Cdc6-related protein, AAA superfamily ATPase                                     | L       | Replication; recombination and repair |                                                                                                        |
| ORC1-type DNA replication protein                                                                                        | Lokiarch_50410 | contig1       | 71539      | 11          | 399            | ref WP_018031285.1  MULTISPECIES: hypothetical protein [unclassified Cenarchaeota (miscellaneous)] - Expect = 8e-76 (37%) | arCOG00467 | COG15474        | Cdc6-related protein, AAA superfamily ATPase                                     | L       | Replication; recombination and repair | 92% identity between each other                                                                        |
| ORC1-type DNA replication protein                                                                                        | Lokiarch_29470 | contig227     | 8809       | 6           | 399            | ref WP_020863095.1  archaeal cell division control protein 6 [Candidatus Caldichaeum subterraneum] - Expect = 2e-32 (29%) | arCOG00467 | COG15474        | Cdc6-related protein, AAA superfamily ATPase                                     | L       | Replication; recombination and repair |                                                                                                        |
| partial ORC1/cdc6 family related protein                                                                                 | Lokiarch_46930 | contig216     | 9258       | 1           | 99             | dbj BA88975.1  cell division control protein 6 [Candidatus Caldichaeum subterraneum] - Expect = 1e-13 (39%)               | arCOG00467 | COG15474        | Cdc6-related protein, AAA superfamily ATPase                                     | L       | Replication; recombination and repair |                                                                                                        |
| putative cell division control protein 6                                                                                 | Lokiarch_51010 | contig1       | 71539      | 70          | 399            | ref WP_007693106.1  cell division control protein 6-like protein [Halococcus hamelinensis] - Expect = 2e-04 (22%)         | arCOG00467 | COG15474        | Cdc6-related protein, AAA superfamily ATPase                                     | L       | Replication; recombination and repair | 92% identity between each other                                                                        |
| partial cdc6-related protein                                                                                             | Lokiarch_25850 | contig488     | 2617       | 5           | 77             | ref WP_013897321.1  cell division control protein Cdc6 [Methanohalobium thillimae] - Expect = 3e-12 (48%)                 | arCOG00467 | COG15474        | Cdc6-related protein, AAA superfamily ATPase                                     | L       | Replication; recombination and repair |                                                                                                        |
| partial cdc6-related protein                                                                                             | Lokiarch_20300 | contig489     | 2598       | 5           | 77             | ref WP_013897321.1  cell division control protein Cdc6 [Methanohalobium thillimae] - Expect = 3e-12 (48%)                 | arCOG00467 | COG15474        | Cdc6-related protein, AAA superfamily ATPase                                     | L       | Replication; recombination and repair |                                                                                                        |
| Minichromosome maintenance protein MCM                                                                                   | Lokiarch_45410 | contig8       | 42635      | 18          | 709            | gb AU84837.1  DNA replication helicase protein MCM [Thermophilum carboxydiphthosus 1505] - Expect = 5e-169 (38%)          | arCOG00439 | COG10241        | Predicted ATPase involved in replication control, Cdc46/Mcm family               | L       | Replication; recombination and repair | 92% identity between each other                                                                        |
| RecJ-like exonuclease                                                                                                    | Lokiarch_17790 | contig92      | 16479      | 4           | 536            | ref WP_007982244.1  recombinase RecJ [Haladaptans pauchobalghii] - Expect = 1e-78 (48%)                                   | arCOG00427 | COG00608        | Single-stranded DNA-specific exonuclease RecJ                                    | L       | Replication; recombination and repair |                                                                                                        |
| putative RecJ-like exonuclease                                                                                           | Lokiarch_30120 | contig150     | 12534      | 6           | 458            | ref WP_00406818.1  single-stranded DNA endonuclease [Thermococcus litoralis] - Expect = 4e-22 (27%)                       | arCOG00427 | COG00608        | Single-stranded DNA-specific exonuclease RecJ                                    | L       | Replication; recombination and repair |                                                                                                        |

| Product                                                                            | Locus        | Contig    | Contig length | ORF number | length (AA) | Top Blast Hit*                                                                                                                                            | arCOG      | COG      | COG description                                                                                                                             | Function | comment                                                    |                                                                                                                                                                                                                                                                                                                                                                            |
|------------------------------------------------------------------------------------|--------------|-----------|---------------|------------|-------------|-----------------------------------------------------------------------------------------------------------------------------------------------------------|------------|----------|---------------------------------------------------------------------------------------------------------------------------------------------|----------|------------------------------------------------------------|----------------------------------------------------------------------------------------------------------------------------------------------------------------------------------------------------------------------------------------------------------------------------------------------------------------------------------------------------------------------------|
| RecJ-like exonuclease                                                              | Lokiar_00590 | contig246 | 8326          | 7          | 536         | ref WP_007982244.1  recombinase RecJ (Haladaplastus pauchalophilus) - Expect = 1e-79 (34%)                                                                | arCOG00427 | COG00608 | Single-stranded DNA-specific exonuclease RecJ                                                                                               | L        | Replication; recombination and repair                      | 90% identity to Lokiar_17790                                                                                                                                                                                                                                                                                                                                               |
| Replication factor C, small subunit                                                | Lokiar_28480 | contig23  | 31031         | 12         | 323         | ref WP_015791939.1  ATPase AAA (Methanocaldococcus fervens) - Expect = 2e-112 (51%)                                                                       | arCOG00469 | COG00470 | ATPase involved in DNA replication HoiB, small subunit                                                                                      | L        | Replication; recombination and repair                      | all three genes seem to encode highly divergent rplC, small subunits suggesting that the duplications are genuine and not due to potential microdiversity in the genome; this might indicate that Lokiarchaenum (like eukaryotes) encodes at least three small subunits of Replication factor C                                                                            |
| Replication factor C, small subunit                                                | Lokiar_12520 | contig374 | 4310          | 2          | 322         | ref WP_013897746.1  ATPase AAA (Methanosulatum zhilinae) - Expect = 1e-71 (37%)                                                                           | arCOG00469 | COG00470 | ATPase involved in DNA replication HoiB, small subunit                                                                                      | L        | Replication; recombination and repair                      |                                                                                                                                                                                                                                                                                                                                                                            |
| Replication factor C, small subunit                                                | Lokiar_12530 | contig374 | 4310          | 3          | 348         | ref WP_015791939.1  ATPase AAA (Methanocaldococcus fervens) - Expect = 3e-50 (32%)                                                                        | arCOG00469 | COG00470 | ATPase involved in DNA replication HoiB, small subunit                                                                                      | L        | Replication; recombination and repair                      |                                                                                                                                                                                                                                                                                                                                                                            |
| putative fragment of replication factor C, small subunit                           | Lokiar_35580 | contig43  | 23852         | 18         | 80          | ref XP_003005043.1  replication factor C, subunit 2 (Verticillium alfalfae VAMs.102) - Expect = 4e-22 (55%)                                               | arCOG00469 | COG00470 | ATPase involved in DNA replication HoiB, small subunit                                                                                      | L        | Replication; recombination and repair                      | only NTD (80AA in length)                                                                                                                                                                                                                                                                                                                                                  |
| putative replication factor C, large subunit                                       | Lokiar_12540 | contig374 | 4310          | 4          | 313         | ref WP_012323440.1  replication protein C (Ignicoccus hospitalis) - Expect = 1e-42 (33%)                                                                  | arCOG00470 | COG00470 | ATPase involved in DNA replication HoiB, large subunit                                                                                      | L        | Replication; recombination and repair                      | end of contig, thus CTD (ca. 100AA) is missing                                                                                                                                                                                                                                                                                                                             |
| fragment of replication factor C, large subunit                                    | Lokiar_40320 | contig425 | 3405          | 4          | 162         | ref WP_013640029.1  replication protein C (Vulcanisaeta moultrooksa) - Expect = 5e-12 (31%, partial)                                                      | arCOG00470 | COG00470 | ATPase involved in DNA replication HoiB, large subunit                                                                                      | L        | Replication; recombination and repair                      |                                                                                                                                                                                                                                                                                                                                                                            |
| fragment of replication factor C, large subunit                                    | Lokiar_44840 | contig434 | 3321          | 4          | 162         | ref WP_013640029.1  replication protein C (Vulcanisaeta moultrooksa) - Expect = 2e-12 (32%)                                                               | arCOG00470 | COG00470 | ATPase involved in DNA replication HoiB, large subunit                                                                                      | L        | Replication; recombination and repair                      |                                                                                                                                                                                                                                                                                                                                                                            |
| Flap endonuclease (Fen-1)                                                          | Lokiar_47590 | contig27  | 29742         | 17         | 353         | ref WP_011998725.1  endonuclease (Ignicoccus hospitalis) - Expect = 1e-102 (48%)                                                                          | arCOG04050 | COG00258 | 5'-3' exonuclease (including N-terminal domain of PolI)                                                                                     | L        | Replication; recombination and repair                      |                                                                                                                                                                                                                                                                                                                                                                            |
| NAD-dependent DNA ligase                                                           | Lokiar_01740 | contig201 | 10044         | 4          | 636         | ref WP_018525347.1  NAD-dependent DNA ligase LigA (Sporichthaea alkalica) - Expect = 0.0 (48%)                                                            | arCOG04754 | COG00272 | NAD-dependent DNA ligase                                                                                                                    | L        | Replication; recombination and repair                      | most similar to bacterial homologs and might have been acquired by HGT (similar to what has been reported for this gene in Methanomassiliococcus alvus (Borret et al., 2014)) or could be due to contamination. However, several surrounding genes are most closely related to archaeal protein homologs suggesting that this contig is indeed derived from Lokiarchaenum. |
| ATP-dependent DNA ligase                                                           | Lokiar_12970 | contig264 | 7590          | 3          | 585         | gb EFW07367.1  ATP-dependent DNA ligase (Sulfolobus archaeus A2-1) - Expect = 8e-143 (40%)                                                                | arCOG01347 | COG11793 | ATP-dependent DNA ligase                                                                                                                    | L        | Replication; recombination and repair                      |                                                                                                                                                                                                                                                                                                                                                                            |
| hypothetical protein with OB-fold                                                  | Lokiar_34240 | contig6   | 43995         | 41         | 243         | WP_012310089.1 OB-fold tRNA/helicase-type nucleic acid binding protein (Candidatus Korarchaeum cryptotolus) - Expect = 7e-45 (27%)                        | arCOG02261 | -        | Protein containing OB-fold-like and PCI domains                                                                                             | R        | General function prediction only                           |                                                                                                                                                                                                                                                                                                                                                                            |
| hypothetical single-stranded DNA-binding protein with nuclease and OB-fold domains | Lokiar_14650 | contig66  | 20056         | 5          | 358         | ref WP_020863706.1  nuclease (Candidatus Caldarchaeum subterraneum) - Expect = 3e-24 (47%)                                                                | arCOG01510 | COG01599 | Single-stranded DNA-binding replication protein A (RPA), large (70 kD) subunit or related ssDNA-binding protein                             | L        | Replication; recombination and repair                      | homologous regions (detected with Blast1) only comprise nuclease domain                                                                                                                                                                                                                                                                                                    |
| putative replication protein A                                                     | Lokiar_33990 | contig6   | 43995         | 17         | 574         | ref WP_011033246.1  replication protein A (Methanosarcina mazei) - Expect = 3e-37 (28%)                                                                   | arCOG01510 | COG01599 | Single-stranded DNA-binding replication protein A (RPA), large (70 kD) subunit or related ssDNA-binding protein                             | L        | Replication; recombination and repair                      |                                                                                                                                                                                                                                                                                                                                                                            |
| archaeal histone                                                                   | Lokiar_38600 | contig127 | 13916         | 10         | 63          | P55669.3  Archaeal histone HfANI subunit A (Thermococcus zilligii) - Expect = 1e-05 (43%)                                                                 | arCOG02144 | COG02036 | Histones H3 and H4                                                                                                                          | L        | Replication; recombination and repair                      |                                                                                                                                                                                                                                                                                                                                                                            |
| archaeal histone                                                                   | Lokiar_09210 | contig140 | 13254         | 9          | 69          | WP_010878990.1  histone (Archaeoglobus fulgidus) - Expect = 2e-13 (54%)                                                                                   | arCOG02144 | COG02036 | Histones H3 and H4                                                                                                                          | L        | Replication; recombination and repair                      |                                                                                                                                                                                                                                                                                                                                                                            |
| archaeal histone                                                                   | Lokiar_14270 | contig144 | 12812         | 1          | 68          | ref WP_034782825.1  histone (Thermococcus sp. CL1) - Expect = 1e-06 (36%)                                                                                 | arCOG02144 | COG02036 | Histones H3 and H4                                                                                                                          | L        | Replication; recombination and repair                      |                                                                                                                                                                                                                                                                                                                                                                            |
| archaeal histone                                                                   | Lokiar_49560 | contig162 | 11997         | 1          | 68          | ref WP_020962325.1  hypothetical protein (Thermoflum sp. T510b) - Expect = 2e-05 (40%)                                                                    | arCOG02144 | COG02036 | Histones H3 and H4                                                                                                                          | L        | Replication; recombination and repair                      |                                                                                                                                                                                                                                                                                                                                                                            |
| archaeal histone                                                                   | Lokiar_40960 | contig79  | 18091         | 12         | 75          | emb CA64119.1  archaeal histone (uncultured archaeon) - Expect = 2e-06 (40%)                                                                              | arCOG02144 | COG02036 | Histones H3 and H4                                                                                                                          | L        | Replication; recombination and repair                      |                                                                                                                                                                                                                                                                                                                                                                            |
| <b>Topoisomerases</b>                                                              |              |           |               |            |             |                                                                                                                                                           |            |          |                                                                                                                                             |          |                                                            |                                                                                                                                                                                                                                                                                                                                                                            |
| Product                                                                            | Locus        | Contig    | Contig length | ORF number | length (AA) | Top Blast Hit*                                                                                                                                            | arCOG      | COG      | COG description                                                                                                                             | Function | comment                                                    |                                                                                                                                                                                                                                                                                                                                                                            |
| Topoisomerase IA (type III)                                                        | Lokiar_09080 | contig48  | 23111         | 16         | 714         | ref WP_008084369.1  DNA topoisomerase I (Aciduliprofundum boonei) - Expect = 8e-91 (35%)                                                                  | arCOG01305 | COG1637  | Topoisomerase DNA binding C4 zinc finger fused to uncharacterized N-terminal domain often associated with RecJ-like endonuclease of COG1637 | L        | Replication; recombination and repair                      | Topoisomerase IB and reverse gyrase are absent from Lokiarchaenum bin and metagenome (except for thaumararchaeal Topo IB homolog)                                                                                                                                                                                                                                          |
| putative DNA topoisomerase IIB (VI), subunit B                                     | Lokiar_45360 | contig8   | 42635         | 13         | 1114        | gb EG043280.1  DNA topoisomerase VI, B subunit (Candidatus Nanoarchaeum sp. J07A843) - Expect = 3e-27 (37%)                                               | arCOG01165 | COG1389  | DNA topoisomerase VI, subunit B                                                                                                             | L        | Replication; recombination and repair                      | only very distantly related to known sequences                                                                                                                                                                                                                                                                                                                             |
| DNA topoisomerase IIB (VI), subunit A                                              | Lokiar_45370 | contig8   | 42635         | 14         | 395         | ref XP_010937777.1  PREDICTED: DNA topoisomerase 6 subunit A3 (Elaeis guineensis) - Expect = 7e-109 (48%)                                                 | arCOG04143 | COG1697  | DNA topoisomerase VI, subunit A                                                                                                             | L        | Replication; recombination and repair                      | most similar to eukaryotic homologs (plant TopoVI, subunit A and sp011) (see Forterre and Gadelle, 2009)                                                                                                                                                                                                                                                                   |
| Topoisomerase IIA (DNA gyrase/topoisomerase IV), B subunit                         | Lokiar_43500 | contig244 | 8418          | 6          | 669         | ref WP_008321250.1  DNA gyrase subunit B (candidate division 200) - Expect = 0.0 (53%)                                                                    | arCOG04371 | COG00187 | Type IIA topoisomerase (DNA gyrase/topo II, topoisomerase IV), B subunit                                                                    | L        | Replication; recombination and repair                      | third blast hit to Methanohalobus psychrophilus; subunit I not part of final bin due to stringent coverage binning but candidate Lokiar contig present in LCGC14 metagenome (contig1198_16831_5.35806_5)                                                                                                                                                                   |
| fragment of Topoisomerase IIA (DNA gyrase/topoisomerase IV), B subunit             | Lokiar_46300 | contig421 | 3444          | 3          | 173         | ref WP_021058867.1  type IIA topoisomerase (DNA gyrase/topo II, topoisomerase IV), B subunit, partial (Halobacterium sp. J07HXQ50) - Expect = 2e-64 (59%) | arCOG04371 | COG00187 | Type IIA topoisomerase (DNA gyrase/topo II, topoisomerase IV), B subunit                                                                    | L        | Replication; recombination and repair                      | overlapping AA region between Lokiar_46300 and Lokiar_43500 is 92% identical                                                                                                                                                                                                                                                                                               |
| <b>Translation factors</b>                                                         |              |           |               |            |             |                                                                                                                                                           |            |          |                                                                                                                                             |          |                                                            |                                                                                                                                                                                                                                                                                                                                                                            |
| Product                                                                            | Locus        | Contig    | Contig length | ORF number | length (AA) | Top Blast Hit*                                                                                                                                            | arCOG      | COG      | COG description                                                                                                                             | Function | comment                                                    |                                                                                                                                                                                                                                                                                                                                                                            |
| Translation initiation factor 1                                                    | Lokiar_33975 | contig6   | 43995         | 105        | 105         | ref WP_026068920.1  translation initiation factor Sui1 (Candidatus Methanomassiliococcus intestini) (2e-25; 43%)                                          | arCOG04223 | COG00023 | Translation initiation factor 1 (eIF-1/SUI1)                                                                                                | J        |                                                            | potentially alternative start codon: ATT; contig location: 12428-12745                                                                                                                                                                                                                                                                                                     |
| Translation elongation factor eEF-2                                                | Lokiar_18540 | contig145 | 12777         | 9          | 752         | ref WP_018103026.1  MULTISPECIES: translation elongation factor eEF-2 (unclassified Thaumarchaeota (miscellaneous)) - Expect = 4e-176 (40%)               | arCOG01559 | COG00480 | Translation elongation factor G, EF-G (GTPase)                                                                                              | J        | Translation; ribosomal structure and biogenesis            |                                                                                                                                                                                                                                                                                                                                                                            |
| partial translation elongation factor eEF-2 (CTD)                                  | Lokiar_15310 | contig148 | 12697         | 1          | 442         | ref WP_011822099.1  translation elongation factor eEF-2 (Hyperthermus butylicus) - Expect = 3e-99 (40%)                                                   | arCOG01559 | COG00480 | Translation elongation factor G, EF-G (GTPase)                                                                                              | J        | Translation; ribosomal structure and biogenesis            | Lokiar_28370 and Lokiar_15310 appear to comprise the NTD and CTD domains of eEF2, respectively and are 94% identical to Lokiar_18540                                                                                                                                                                                                                                       |
| partial translation elongation factor eEF-2 (NTD)                                  | Lokiar_28370 | contig23  | 31031         | 1          | 287         | gb ADX78262.1  elongation factor-2 (Thermococcus sp. LMO-A2) - Expect = 1e-74 (46%)                                                                       | arCOG01559 | COG00480 | Translation elongation factor G, EF-G (GTPase)                                                                                              | J        | Translation; ribosomal structure and biogenesis            |                                                                                                                                                                                                                                                                                                                                                                            |
| fragment of translation elongation factor eEF2                                     | Lokiar_16250 | contig413 | 3648          | 4          | 65          | ref WP_013303951.1  translation elongation factor eEF-2 (Ignisphaera aggregans) - Expect = 0.001 (41%)                                                    | arCOG01559 | COG00480 | Translation elongation factor G, EF-G (GTPase)                                                                                              | J        | Translation; ribosomal structure and biogenesis            |                                                                                                                                                                                                                                                                                                                                                                            |
| partial translation elongation factor eEF-2 (NTD)                                  | Lokiar_13430 | contig619 | 1315          | 1          | 414         | ref WP_018194176.1  MULTISPECIES: translation elongation factor eEF-2 (candidate division YNPF4) - Expect = 5e-150 (52%)                                  | arCOG01559 | COG00480 | Translation elongation factor G, EF-G (GTPase)                                                                                              | J        | Translation; ribosomal structure and biogenesis            | 39% identical to overlapping region of Lokiar_18540                                                                                                                                                                                                                                                                                                                        |
| partial translation initiation factor eIF-2                                        | Lokiar_18570 | contig145 | 12777         | 12         | 383         | ref WP_011821627.1  translation initiation factor eIF-2 (Hyperthermus butylicus) - Expect = 8e-113 (67%)                                                  | arCOG01560 | COG00532 | Translation initiation factor 2 (IF-2; GTPase)                                                                                              | J        | Translation; ribosomal structure and biogenesis            | overlapping region of Lokiar_18570 and Lokiar_28430 shares 92% identity                                                                                                                                                                                                                                                                                                    |
| Translation initiation factor eIF-2                                                | Lokiar_28430 | contig23  | 31031         | 7          | 602         | ref WP_011998937.1  translation initiation factor eIF-2 (Ignicoccus hospitalis) - Expect = 0.0 (48%)                                                      | arCOG01560 | COG00532 | Translation initiation factor 2 (IF-2; GTPase)                                                                                              | J        | Translation; ribosomal structure and biogenesis            |                                                                                                                                                                                                                                                                                                                                                                            |
| Translation elongation factor EF-1alpha                                            | Lokiar_28570 | contig23  | 31031         | 21         | 438         | emb CCCS5680.1  translation elongation factor EF-1alpha (uncultured archaeon) - Expect = 0.0 (58%)                                                        | arCOG01561 | COG05256 | Translation elongation factor EF-1alpha (GTPase)                                                                                            | J        | Translation; ribosomal structure and biogenesis            |                                                                                                                                                                                                                                                                                                                                                                            |
| Translation initiation factor eIF-2                                                | Lokiar_30090 | contig150 | 12534         | 3          | 532         | ref WP_013099590.1  translation initiation factor (IF-2 subunit gamma) (Methanocaldococcus infernus) - Expect = 1e-151 (55%)                              | arCOG01563 | COG05257 | Translation initiation factor 2, gamma subunit (eIF-2gamma; GTPase)                                                                         | J        | Translation; ribosomal structure and biogenesis            |                                                                                                                                                                                                                                                                                                                                                                            |
| <b>Others</b>                                                                      |              |           |               |            |             |                                                                                                                                                           |            |          |                                                                                                                                             |          |                                                            |                                                                                                                                                                                                                                                                                                                                                                            |
| Product                                                                            | Locus        | Contig    | Contig length | ORF number | length (AA) | Top Blast Hit*                                                                                                                                            | arCOG      | COG      | COG description                                                                                                                             | Function | comment                                                    |                                                                                                                                                                                                                                                                                                                                                                            |
| putative cell division GTPase, FtsZ                                                | Lokiar_34180 | contig6   | 43995         | 35         | 371         | ref WP_015790785.1  cell division protein FtsZ (Methanocaldococcus fervens) - Expect = 4e-117 (57%)                                                       | arCOG02201 | COG00206 | Cell division GTPase                                                                                                                        | D        | Cell cycle control; cell division; chromosome partitioning | we could not identify homologs of tubulins and/or (ar-) tubulins in Lokiarchaenum and LCGC14                                                                                                                                                                                                                                                                               |

\* in case top blast hit was to a single cell genome, the second best blast hit was listed; identity in parenthesis; red: top hit to Eukaryotes, orange: top hit to Bacteria; green/bold: alternative start codon

### Suppl. Table S10: InterProScan assignments of selected hypothetical proteins of lokiarchaeal composite genome discussed in the manuscript and/or supplementary discussion

| IPR-scan results for roadblock/LC7, gelsolin, longin and RING domain proteins as well as the steadiness containing protein and MON1 |                     |                 |                        |                                                                                                       |                |               |          |                                  |                              |                       |
|-------------------------------------------------------------------------------------------------------------------------------------|---------------------|-----------------|------------------------|-------------------------------------------------------------------------------------------------------|----------------|---------------|----------|----------------------------------|------------------------------|-----------------------|
| Locus                                                                                                                               | Protein Length (AA) | Analysis        | Signature Accession    | Signature Description                                                                                 | Start location | Stop location | E-value  | InterPro annotations - accession | IPR-domain description       | GO-number             |
| <b>hypothetical proteins with gelsolin-like domains</b>                                                                             |                     |                 |                        |                                                                                                       |                |               |          |                                  |                              |                       |
| Lokiarch_14520                                                                                                                      | 233                 | Gene3D          | G3DSA:3.40.20.10       |                                                                                                       | 31             | 108           | 5.1E-5   | IPRO29006                        | ADF-H/Gelsolin-like domain   |                       |
| Lokiarch_14520                                                                                                                      | 233                 | Coils           | Coil                   |                                                                                                       | 212            | 233           | -        |                                  |                              |                       |
| Lokiarch_14520                                                                                                                      | 233                 | SUPERFAMILY     | SSF55753               |                                                                                                       | 36             | 104           | 1.99E-6  |                                  |                              |                       |
| Lokiarch_20110                                                                                                                      | 360                 | Gene3D          | G3DSA:3.40.20.10       |                                                                                                       | 18             | 114           | 2.4E-11  | IPRO29006                        | ADF-H/Gelsolin-like domain   |                       |
| Lokiarch_20110                                                                                                                      | 360                 | SUPERFAMILY     | SSF55753               |                                                                                                       | 8              | 108           | 3.74E-10 |                                  |                              |                       |
| Lokiarch_19250                                                                                                                      | 293                 | Gene3D          | G3DSA:3.40.20.10       |                                                                                                       | 5              | 113           | 3.0E-10  | IPRO29006                        | ADF-H/Gelsolin-like domain   |                       |
| Lokiarch_19250                                                                                                                      | 293                 | SUPERFAMILY     | SSF55753               |                                                                                                       | 12             | 114           | 4.44E-10 |                                  |                              |                       |
| Lokiarch_14340                                                                                                                      | 335                 | Pfam            | PF00626                | Gelsolin repeat                                                                                       | 131            | 190           | 4.8E-8   | IPRO07123                        | Gelsolin-like domain         |                       |
| Lokiarch_14340                                                                                                                      | 335                 | Pfam            | PF00626                | Gelsolin repeat                                                                                       | 19             | 79            | 3.0E-15  | IPRO07123                        | Gelsolin-like domain         |                       |
| Lokiarch_14340                                                                                                                      | 335                 | Gene3D          | G3DSA:3.40.20.10       |                                                                                                       | 129            | 216           | 1.9E-15  | IPRO29006                        | ADF-H/Gelsolin-like domain   |                       |
| Lokiarch_14340                                                                                                                      | 335                 | SMART           | SM00262                | Gelsolin homology domain                                                                              | 119            | 209           | 1.2E-8   | IPRO07122                        | Villin/Gelsolin              | GO:0003779            |
| Lokiarch_14340                                                                                                                      | 335                 | SMART           | SM00262                | Gelsolin homology domain                                                                              | 2              | 85            | 8.1E-15  | IPRO07122                        | Villin/Gelsolin              | GO:0003779            |
| Lokiarch_14340                                                                                                                      | 335                 | SUPERFAMILY     | SSF55753               |                                                                                                       | 128            | 215           | 9.58E-16 |                                  |                              |                       |
| Lokiarch_14340                                                                                                                      | 335                 | Gene3D          | G3DSA:3.40.20.10       |                                                                                                       | 11             | 82            | 1.3E-17  | IPRO29006                        | ADF-H/Gelsolin-like domain   |                       |
| Lokiarch_14340                                                                                                                      | 335                 | PANTHER         | PTHR11977              |                                                                                                       | 19             | 178           | 1.2E-24  | IPRO07122                        | Villin/Gelsolin              | GO:0003779            |
| Lokiarch_49620                                                                                                                      | 335                 | Gene3D          | G3DSA:3.40.20.10       |                                                                                                       | 11             | 83            | 4.5E-18  | IPRO29006                        | ADF-H/Gelsolin-like domain   |                       |
| Lokiarch_49620                                                                                                                      | 335                 | Pfam            | PF00626                | Gelsolin repeat                                                                                       | 131            | 190           | 5.2E-8   | IPRO07123                        | Gelsolin-like domain         |                       |
| Lokiarch_49620                                                                                                                      | 335                 | Pfam            | PF00626                | Gelsolin repeat                                                                                       | 19             | 79            | 4.2E-16  | IPRO07123                        | Gelsolin-like domain         |                       |
| Lokiarch_49620                                                                                                                      | 335                 | SUPERFAMILY     | SSF55753               |                                                                                                       | 118            | 215           | 2.8E-16  |                                  |                              |                       |
| Lokiarch_49620                                                                                                                      | 335                 | SMART           | SM00262                | Gelsolin homology domain                                                                              | 119            | 209           | 4.3E-10  | IPRO07122                        | Villin/Gelsolin              | GO:0003779            |
| Lokiarch_49620                                                                                                                      | 335                 | SMART           | SM00262                | Gelsolin homology domain                                                                              | 2              | 85            | 1.3E-15  | IPRO07122                        | Villin/Gelsolin              | GO:0003779            |
| Lokiarch_49620                                                                                                                      | 335                 | SUPERFAMILY     | SSF55753               |                                                                                                       | 10             | 85            | 1.31E-19 |                                  |                              |                       |
| Lokiarch_49620                                                                                                                      | 335                 | PANTHER         | PTHR11977              |                                                                                                       | 19             | 178           | 2.1E-25  | IPRO07122                        | Villin/Gelsolin              | GO:0003779            |
| Lokiarch_49620                                                                                                                      | 335                 | Gene3D          | G3DSA:3.40.20.10       |                                                                                                       | 129            | 216           | 7.5E-16  | IPRO29006                        | ADF-H/Gelsolin-like domain   |                       |
| Lokiarch_16460                                                                                                                      | 141                 | Pfam            | PF00626                | Gelsolin repeat                                                                                       | 19             | 81            | 3.6E-6   | IPRO07123                        | Gelsolin-like domain         |                       |
| Lokiarch_16460                                                                                                                      | 141                 | Gene3D          | G3DSA:3.40.20.10       |                                                                                                       | 2              | 87            | 2.8E-13  | IPRO29006                        | ADF-H/Gelsolin-like domain   |                       |
| Lokiarch_16460                                                                                                                      | 141                 | SUPERFAMILY     | SSF55753               |                                                                                                       | 19             | 88            | 2.57E-11 |                                  |                              |                       |
| Lokiarch_42060                                                                                                                      | 199                 | SMART           | SM00262                | Gelsolin homology domain                                                                              | 2              | 89            | 0.0042   | IPRO07122                        | Villin/Gelsolin              | GO:0003779            |
| Lokiarch_42060                                                                                                                      | 199                 | SUPERFAMILY     | SSF55753               |                                                                                                       | 14             | 80            | 1.24E-12 |                                  |                              |                       |
| Lokiarch_42060                                                                                                                      | 199                 | Pfam            | PF00626                | Gelsolin repeat                                                                                       | 14             | 79            | 6.6E-14  | IPRO07123                        | Gelsolin-like domain         |                       |
| Lokiarch_42060                                                                                                                      | 199                 | Gene3D          | G3DSA:3.40.20.10       |                                                                                                       | 14             | 81            | 9.7E-13  | IPRO29006                        | ADF-H/Gelsolin-like domain   |                       |
| Lokiarch_06290                                                                                                                      | 199                 | Gene3D          | G3DSA:3.40.20.10       |                                                                                                       | 14             | 81            | 1.7E-13  | IPRO29006                        | ADF-H/Gelsolin-like domain   |                       |
| Lokiarch_06290                                                                                                                      | 199                 | Pfam            | PF00626                | Gelsolin repeat                                                                                       | 14             | 79            | 2.8E-14  | IPRO07123                        | Gelsolin-like domain         |                       |
| Lokiarch_06290                                                                                                                      | 199                 | SUPERFAMILY     | SSF55753               |                                                                                                       | 14             | 80            | 5.14E-13 |                                  |                              |                       |
| Lokiarch_35550                                                                                                                      | 317                 | SUPERFAMILY     | SSF55753               |                                                                                                       | 9              | 112           | 1.01E-8  |                                  |                              |                       |
| Lokiarch_35550                                                                                                                      | 317                 | Gene3D          | G3DSA:1.10.720.30      |                                                                                                       | 279            | 309           | 3.8E-4   | IPRO03034                        | SAP domain                   | GO:0003676            |
| Lokiarch_35550                                                                                                                      | 317                 | Gene3D          | G3DSA:3.40.20.10       |                                                                                                       | 13             | 115           | 2.5E-9   | IPRO29006                        | ADF-H/Gelsolin-like domain   |                       |
| Lokiarch_33820                                                                                                                      | 329                 | SUPERFAMILY     | SSF55753               |                                                                                                       | 22             | 118           | 2.22E-7  |                                  |                              |                       |
| Lokiarch_33820                                                                                                                      | 329                 | Gene3D          | G3DSA:3.40.20.10       |                                                                                                       | 39             | 119           | 6.2E-9   | IPRO29006                        | ADF-H/Gelsolin-like domain   |                       |
| Lokiarch_32420                                                                                                                      | 180                 | Gene3D          | G3DSA:3.40.20.10       |                                                                                                       | 26             | 93            | 1.0E-6   | IPRO29006                        | ADF-H/Gelsolin-like domain   |                       |
| Lokiarch_32420                                                                                                                      | 180                 | SUPERFAMILY     | SSF55753               |                                                                                                       | 9              | 91            | 3.97E-8  |                                  |                              |                       |
| Lokiarch_14920                                                                                                                      | 235                 | SUPERFAMILY     | SSF55753               |                                                                                                       | 35             | 107           | 4.91E-8  |                                  |                              |                       |
| Lokiarch_14920                                                                                                                      | 235                 | Gene3D          | G3DSA:3.40.20.10       |                                                                                                       | 33             | 114           | 3.5E-7   | IPRO29006                        | ADF-H/Gelsolin-like domain   |                       |
| <b>hypothetical protein</b>                                                                                                         |                     |                 |                        |                                                                                                       |                |               |          |                                  |                              |                       |
| Lokiarch_16740                                                                                                                      | 650                 | Coils           | Coil                   |                                                                                                       | 619            | 640           | -        |                                  |                              |                       |
| Lokiarch_16740                                                                                                                      | 650                 | ProSiteProfiles | PSS1312                | Steadiness box (SB) domain profile.                                                                   | 568            | 636           | 8.583    | IPRO17916                        | Steadiness box               |                       |
| <b>hypothetical proteins with MON1 domains</b>                                                                                      |                     |                 |                        |                                                                                                       |                |               |          |                                  |                              |                       |
| Lokiarch_21780                                                                                                                      | 130                 | Pfam            | PF03164                | Trafficking protein Mon1                                                                              | 5              | 90            | 2.3E-6   | IPRO04353                        | Vacuolar fusion protein MON1 |                       |
| Lokiarch_01670                                                                                                                      | 137                 | Pfam            | PF03164                | Trafficking protein Mon1                                                                              | 6              | 95            | 1.3E-6   | IPRO04353                        | Vacuolar fusion protein MON1 |                       |
| Lokiarch_15160                                                                                                                      | 128                 | Pfam            | PF03164                | Trafficking protein Mon1                                                                              | 5              | 94            | 2.2E-5   | IPRO04353                        | Vacuolar fusion protein MON1 |                       |
| <b>hypothetical proteins with longin domains</b>                                                                                    |                     |                 |                        |                                                                                                       |                |               |          |                                  |                              |                       |
| Lokiarch_01890                                                                                                                      | 169                 | SUPERFAMILY     | SSF64356               |                                                                                                       | 1              | 127           | 9.16E-7  | IPRO11012                        | Longin-like domain           | GO:0006810            |
| Lokiarch_01890                                                                                                                      | 169                 | Gene3D          | G3DSA:3.30.450.60      |                                                                                                       | 1              | 99            | 4.1E-6   |                                  |                              |                       |
| Lokiarch_13110                                                                                                                      | 132                 | Gene3D          | G3DSA:3.30.450.50      |                                                                                                       | 51             | 121           | 1.4E-4   | IPRO10908                        | Longin domain                |                       |
| Lokiarch_13110                                                                                                                      | 132                 | SUPERFAMILY     | SSF64356               |                                                                                                       | 43             | 122           | 7.88E-7  | IPRO11012                        | Longin-like domain           | GO:0006810            |
| Lokiarch_03280                                                                                                                      | 252                 | Gene3D          | G3DSA:3.30.450.60      |                                                                                                       | 3              | 102           | 1.4E-5   |                                  |                              |                       |
| Lokiarch_03280                                                                                                                      | 252                 | SUPERFAMILY     | SSF64356               |                                                                                                       | 3              | 106           | 1.16E-7  | IPRO11012                        | Longin-like domain           | GO:0006810            |
| Lokiarch_22790                                                                                                                      | 130                 | SUPERFAMILY     | SSF64356               |                                                                                                       | 6              | 118           | 3.89E-5  | IPRO11012                        | Longin-like domain           | GO:0006810            |
| Lokiarch_04850                                                                                                                      | 167                 | SUPERFAMILY     | SSF64356               |                                                                                                       | 1              | 126           | 6.41E-9  | IPRO11012                        | Longin-like domain           | GO:0006810            |
| Lokiarch_04850                                                                                                                      | 167                 | Gene3D          | G3DSA:3.30.450.60      |                                                                                                       | 1              | 90            | 4.9E-7   |                                  |                              |                       |
| <b>hypothetical proteins with FAM92 domains</b>                                                                                     |                     |                 |                        |                                                                                                       |                |               |          |                                  |                              |                       |
| Lokiarch_46220                                                                                                                      | 216                 | ProSiteProfiles | PSS1021                | BAR domain profile.                                                                                   | 1              | 213           | 14.541   | IPRO04148                        | BAR domain                   | GO:0005515 GO:0005737 |
| Lokiarch_46220                                                                                                                      | 216                 | Coils           | Coil                   |                                                                                                       | 139            | 174           | -        |                                  |                              |                       |
| Lokiarch_46220                                                                                                                      | 216                 | Coils           | Coil                   |                                                                                                       | 92             | 130           | -        |                                  |                              |                       |
| Lokiarch_46220                                                                                                                      | 216                 | SUPERFAMILY     | SSF103657              |                                                                                                       | 8              | 202           | 3.14E-12 |                                  |                              |                       |
| Lokiarch_46220                                                                                                                      | 216                 | Pfam            | PF06730                | FAM92 protein                                                                                         | 40             | 211           | 2.5E-6   | IPRO09602                        | FAM92 protein                |                       |
| Lokiarch_08900                                                                                                                      | 216                 | Coils           | Coil                   |                                                                                                       | 139            | 174           | -        |                                  |                              |                       |
| Lokiarch_08900                                                                                                                      | 216                 | SUPERFAMILY     | SSF103657              |                                                                                                       | 7              | 202           | 5.36E-14 |                                  |                              |                       |
| Lokiarch_08900                                                                                                                      | 216                 | Coils           | Coil                   |                                                                                                       | 92             | 130           | -        |                                  |                              |                       |
| Lokiarch_08900                                                                                                                      | 216                 | Pfam            | PF06730                | FAM92 protein                                                                                         | 9              | 211           | 1.5E-10  | IPRO09602                        | FAM92 protein                |                       |
| <b>hypothetical proteins with ubiquitin-like domains</b>                                                                            |                     |                 |                        |                                                                                                       |                |               |          |                                  |                              |                       |
| Lokiarch_29280                                                                                                                      | 133                 | SUPERFAMILY     | SSF54236               |                                                                                                       | 45             | 125           | 9.44E-10 | IPRO29071                        | Ubiquitin-related domain     |                       |
| Lokiarch_29280                                                                                                                      | 133                 | ProSiteProfiles | PSS0053                | Ubiquitin domain profile.                                                                             | 53             | 131           | 10.658   | IPRO00626                        | Ubiquitin-like               | GO:0005515            |
| Lokiarch_29280                                                                                                                      | 133                 | Gene3D          | G3DSA:3.10.20.90       |                                                                                                       | 66             | 124           | 8.3E-9   |                                  |                              |                       |
| Lokiarch_29290                                                                                                                      | 266                 | Phobius         | CYTOPLASMIC_DOMAIN     | Region of a membrane-bound protein predicted to be outside the membrane, in the cytoplasm.            | 55             | 266           | -        |                                  |                              |                       |
| Lokiarch_29290                                                                                                                      | 266                 | TMHMM           | TMhelix                | Region of a membrane-bound protein predicted to be embedded in the membrane.                          | 32             | 54            | -        |                                  |                              |                       |
| Lokiarch_29290                                                                                                                      | 266                 | Phobius         | CYTOPLASMIC_DOMAIN     | Region of a membrane-bound protein predicted to be outside the membrane, in the cytoplasm.            | 1              | 6             | -        |                                  |                              |                       |
| Lokiarch_29290                                                                                                                      | 266                 | SUPERFAMILY     | SSF54236               |                                                                                                       | 179            | 263           | 9.21E-7  | IPRO29071                        | Ubiquitin-related domain     |                       |
| Lokiarch_29290                                                                                                                      | 266                 | Phobius         | NON_CYTOPLASMIC_DOMAIN | Region of a membrane-bound protein predicted to be outside the membrane, in the extracellular region. | 27             | 31            | -        |                                  |                              |                       |
| Lokiarch_29290                                                                                                                      | 266                 | Phobius         | TRANSMEMBRANE          | Region of a membrane-bound protein predicted to be embedded in the membrane.                          | 32             | 54            | -        |                                  |                              |                       |
| Lokiarch_29290                                                                                                                      | 266                 | Phobius         | TRANSMEMBRANE          | Region of a membrane-bound protein predicted to be embedded in the membrane.                          | 7              | 26            | -        |                                  |                              |                       |
| Lokiarch_29290                                                                                                                      | 266                 | TMHMM           | TMhelix                | Region of a membrane-bound protein predicted to be embedded in the membrane.                          | 7              | 28            | -        |                                  |                              |                       |



|                                                                                                                                  |      |                 |                        |                                                                                                       |      |      |          |           |                                 |                       |
|----------------------------------------------------------------------------------------------------------------------------------|------|-----------------|------------------------|-------------------------------------------------------------------------------------------------------|------|------|----------|-----------|---------------------------------|-----------------------|
| Lokiarch_29310                                                                                                                   | 113  | SUPERFAMILY     | SSF54236               |                                                                                                       | 40   | 109  | 7.66E-10 | IPRO29071 | Ubiquitin-related domain        |                       |
| Lokiarch_29310                                                                                                                   | 113  | Gene3D          | G3DSA:3.10.20.90       |                                                                                                       | 47   | 106  | 5.0E-7   |           |                                 |                       |
| Lokiarch_29310                                                                                                                   | 113  | Pfam            | PF00240                | Ubiquitin family                                                                                      | 49   | 105  | 3.9E-6   | IPRO00626 | Ubiquitin-like                  | GO:0005515            |
| Lokiarch_29310                                                                                                                   | 113  | ProSiteProfiles | PSS0053                | Ubiquitin domain profile.                                                                             | 52   | 113  | 9.33     | IPRO00626 | Ubiquitin-like                  | GO:0005515            |
| Lokiarch_37670                                                                                                                   | 88   | ProSiteProfiles | PSS0053                | Ubiquitin domain profile.                                                                             | 20   | 82   | 10.811   | IPRO00626 | Ubiquitin-like                  | GO:0005515            |
| Lokiarch_37670                                                                                                                   | 88   | Pfam            | PF00240                | Ubiquitin family                                                                                      | 20   | 77   | 1.7E-6   | IPRO00626 | Ubiquitin-like                  | GO:0005515            |
| Lokiarch_37670                                                                                                                   | 88   | SUPERFAMILY     | SSF54236               |                                                                                                       | 12   | 85   | 9.42E-8  | IPRO29071 | Ubiquitin-related domain        |                       |
| Lokiarch_37670                                                                                                                   | 88   | Gene3D          | G3DSA:3.10.20.90       |                                                                                                       | 20   | 81   | 5.4E-7   |           |                                 |                       |
| Lokiarch_28320                                                                                                                   | 1687 | Phobius         | TRANSMEMBRANE          | Region of a membrane-bound protein predicted to be embedded in the membrane.                          | 412  | 435  | -        |           |                                 |                       |
| Lokiarch_28320                                                                                                                   | 1687 | TMHMM           | TMhelix                | Region of a membrane-bound protein predicted to be embedded in the membrane.                          | 1011 | 1033 | -        |           |                                 |                       |
| Lokiarch_28320                                                                                                                   | 1687 | SUPERFAMILY     | SSF54236               |                                                                                                       | 1064 | 1134 | 1.8E-7   | IPRO29071 | Ubiquitin-related domain        |                       |
| Lokiarch_28320                                                                                                                   | 1687 | ProSiteProfiles | PSS0053                | Ubiquitin domain profile.                                                                             | 1064 | 1137 | 11.028   | IPRO00626 | Ubiquitin-like                  | GO:0005515            |
| Lokiarch_28320                                                                                                                   | 1687 | Phobius         | NON_CYTOPLASMIC_DOMAIN | Region of a membrane-bound protein predicted to be outside the membrane, in the extracellular region. | 844  | 1687 | -        |           |                                 |                       |
| Lokiarch_28320                                                                                                                   | 1687 | Phobius         | CYTOPLASMIC_DOMAIN     | Region of a membrane-bound protein predicted to be outside the membrane, in the cytoplasm.            | 436  | 818  | -        |           |                                 |                       |
| Lokiarch_28320                                                                                                                   | 1687 | Phobius         | NON_CYTOPLASMIC_DOMAIN | Region of a membrane-bound protein predicted to be outside the membrane, in the extracellular region. | 1    | 411  | -        |           |                                 |                       |
| Lokiarch_28320                                                                                                                   | 1687 | Gene3D          | G3DSA:3.10.20.90       |                                                                                                       | 1077 | 1137 | 5.8E-5   |           |                                 |                       |
| Lokiarch_28320                                                                                                                   | 1687 | Phobius         | TRANSMEMBRANE          | Region of a membrane-bound protein predicted to be embedded in the membrane.                          | 819  | 843  | -        |           |                                 |                       |
| Lokiarch_28320                                                                                                                   | 1687 | TMHMM           | TMhelix                | Region of a membrane-bound protein predicted to be embedded in the membrane.                          | 821  | 843  | -        |           |                                 |                       |
| <b>hypothetical proteins with ZINC-finger, RING-type domains (excluding those with additional von Willebrand factor domains)</b> |      |                 |                        |                                                                                                       |      |      |          |           |                                 |                       |
| Lokiarch_38540                                                                                                                   | 192  | ProSiteProfiles | PSS0089                | Zinc finger RING-type profile.                                                                        | 4    | 46   | 8.934    | IPRO01841 | Zinc finger, RING-type          | GO:0005515 GO:0008270 |
| Lokiarch_38540                                                                                                                   | 192  | Pfam            | PF13639                | Ring finger domain                                                                                    | 3    | 45   | 4.5E-7   | IPRO01841 | Zinc finger, RING-type          | GO:0005515 GO:0008270 |
| Lokiarch_38540                                                                                                                   | 192  | SUPERFAMILY     | SSF48452               |                                                                                                       | 96   | 190  | 6.13E-10 |           |                                 |                       |
| Lokiarch_38540                                                                                                                   | 192  | Gene3D          | G3DSA:3.30.40.10       |                                                                                                       | 3    | 53   | 3.8E-9   | IPRO13083 | Zinc finger, RING/FYVE/PHD-type |                       |
| Lokiarch_38540                                                                                                                   | 192  | SUPERFAMILY     | SSF57850               |                                                                                                       | 3    | 52   | 1.9E-8   |           |                                 |                       |
| Lokiarch_38540                                                                                                                   | 192  | Gene3D          | G3DSA:1.25.40.10       |                                                                                                       | 96   | 190  | 6.1E-9   | IPRO11990 | Tetratricopeptide-like helical  | GO:0005515            |
| Lokiarch_14290                                                                                                                   | 675  | Coils           | Coil                   |                                                                                                       | 450  | 471  | -        |           |                                 |                       |
| Lokiarch_14290                                                                                                                   | 675  | Gene3D          | G3DSA:3.30.40.10       |                                                                                                       | 609  | 659  | 1.0E-7   | IPRO13083 | Zinc finger, RING/FYVE/PHD-type |                       |
| Lokiarch_14290                                                                                                                   | 675  | Coils           | Coil                   |                                                                                                       | 561  | 582  | -        |           |                                 |                       |
| Lokiarch_14290                                                                                                                   | 675  | SUPERFAMILY     | SSF57850               |                                                                                                       | 601  | 662  | 9.77E-9  |           |                                 |                       |
| Lokiarch_14290                                                                                                                   | 675  | Coils           | Coil                   |                                                                                                       | 97   | 118  | -        |           |                                 |                       |
| Lokiarch_14290                                                                                                                   | 675  | ProSiteProfiles | PSS0089                | Zinc finger RING-type profile.                                                                        | 613  | 656  | 9.583    | IPRO01841 | Zinc finger, RING-type          | GO:0005515 GO:0008270 |
| Lokiarch_49580                                                                                                                   | 678  | Coils           | Coil                   |                                                                                                       | 450  | 471  | -        |           |                                 |                       |
| Lokiarch_49580                                                                                                                   | 678  | Coils           | Coil                   |                                                                                                       | 561  | 582  | -        |           |                                 |                       |
| Lokiarch_49580                                                                                                                   | 678  | Gene3D          | G3DSA:3.30.40.10       |                                                                                                       | 608  | 661  | 7.9E-8   | IPRO13083 | Zinc finger, RING/FYVE/PHD-type |                       |
| Lokiarch_49580                                                                                                                   | 678  | SUPERFAMILY     | SSF57850               |                                                                                                       | 601  | 662  | 1.02E-8  |           |                                 |                       |
| Lokiarch_49580                                                                                                                   | 678  | ProSiteProfiles | PSS0089                | Zinc finger RING-type profile.                                                                        | 613  | 656  | 9.583    | IPRO01841 | Zinc finger, RING-type          | GO:0005515 GO:0008270 |
| Lokiarch_36980                                                                                                                   | 67   | ProSiteProfiles | PSS0089                | Zinc finger RING-type profile.                                                                        | 9    | 53   | 8.89     | IPRO01841 | Zinc finger, RING-type          | GO:0005515 GO:0008270 |
| Lokiarch_36980                                                                                                                   | 67   | SUPERFAMILY     | SSF57850               |                                                                                                       | 5    | 60   | 6.53E-7  |           |                                 |                       |
| Lokiarch_36980                                                                                                                   | 67   | Gene3D          | G3DSA:3.30.40.10       |                                                                                                       | 1    | 59   | 1.6E-6   | IPRO13083 | Zinc finger, RING/FYVE/PHD-type |                       |
| Lokiarch_35850                                                                                                                   | 178  | Phobius         | CYTOPLASMIC_DOMAIN     | Region of a membrane-bound protein predicted to be outside the membrane, in the cytoplasm.            | 178  | 178  | -        |           |                                 |                       |
| Lokiarch_35850                                                                                                                   | 178  | Phobius         | NON_CYTOPLASMIC_DOMAIN | Region of a membrane-bound protein predicted to be outside the membrane, in the extracellular region. | 151  | 155  | -        |           |                                 |                       |
| Lokiarch_35850                                                                                                                   | 178  | TMHMM           | TMhelix                | Region of a membrane-bound protein predicted to be embedded in the membrane.                          | 128  | 150  | -        |           |                                 |                       |
| Lokiarch_35850                                                                                                                   | 178  | Phobius         | TRANSMEMBRANE          | Region of a membrane-bound protein predicted to be embedded in the membrane.                          | 156  | 177  | -        |           |                                 |                       |
| Lokiarch_35850                                                                                                                   | 178  | Phobius         | TRANSMEMBRANE          | Region of a membrane-bound protein predicted to be embedded in the membrane.                          | 127  | 150  | -        |           |                                 |                       |
| Lokiarch_35850                                                                                                                   | 178  | Gene3D          | G3DSA:3.30.40.10       |                                                                                                       | 41   | 101  | 2.0E-4   | IPRO13083 | Zinc finger, RING/FYVE/PHD-type |                       |
| Lokiarch_35850                                                                                                                   | 178  | TMHMM           | TMhelix                | Region of a membrane-bound protein predicted to be embedded in the membrane.                          | 160  | 177  | -        |           |                                 |                       |
| Lokiarch_35850                                                                                                                   | 178  | Phobius         | CYTOPLASMIC_DOMAIN     | Region of a membrane-bound protein predicted to be outside the membrane, in the cytoplasm.            | 1    | 126  | -        |           |                                 |                       |
| Lokiarch_30770                                                                                                                   | 150  | Gene3D          | G3DSA:3.30.40.10       |                                                                                                       | 58   | 81   | 2.0E-4   | IPRO13083 | Zinc finger, RING/FYVE/PHD-type |                       |
| Lokiarch_30770                                                                                                                   | 150  | Gene3D          | G3DSA:3.30.40.10       |                                                                                                       | 126  | 149  | 2.0E-4   | IPRO13083 | Zinc finger, RING/FYVE/PHD-type |                       |
| Lokiarch_30770                                                                                                                   | 150  | Phobius         | TRANSMEMBRANE          | Region of a membrane-bound protein predicted to be embedded in the membrane.                          | 31   | 51   | -        |           |                                 |                       |
| Lokiarch_30770                                                                                                                   | 150  | TMHMM           | TMhelix                | Region of a membrane-bound protein predicted to be embedded in the membrane.                          | 31   | 53   | -        |           |                                 |                       |
| Lokiarch_30770                                                                                                                   | 150  | Phobius         | CYTOPLASMIC_DOMAIN     | Region of a membrane-bound protein predicted to be outside the membrane, in the cytoplasm.            | 1    | 30   | -        |           |                                 |                       |
| Lokiarch_30770                                                                                                                   | 150  | Phobius         | NON_CYTOPLASMIC_DOMAIN | Region of a membrane-bound protein predicted to be outside the membrane, in the extracellular region. | 52   | 150  | -        |           |                                 |                       |
| Lokiarch_45630                                                                                                                   | 100  | SUPERFAMILY     | SSF57903               |                                                                                                       | 28   | 80   | 1.15E-5  | IPRO11011 | Zinc finger, FYVE/PHD-type      |                       |
| Lokiarch_45630                                                                                                                   | 100  | Gene3D          | G3DSA:3.30.40.10       |                                                                                                       | 19   | 82   | 2.1E-7   | IPRO13083 | Zinc finger, RING/FYVE/PHD-type |                       |
| Lokiarch_46790                                                                                                                   | 149  | Gene3D          | G3DSA:3.30.40.10       |                                                                                                       | 57   | 81   | 4.1E-4   | IPRO13083 | Zinc finger, RING/FYVE/PHD-type |                       |
| Lokiarch_46790                                                                                                                   | 149  | Gene3D          | G3DSA:3.30.40.10       |                                                                                                       | 124  | 147  | 4.1E-4   | IPRO13083 | Zinc finger, RING/FYVE/PHD-type |                       |

|                                  |     |             |                        |                                                                                                       |     |     |          |           |                                 |  |
|----------------------------------|-----|-------------|------------------------|-------------------------------------------------------------------------------------------------------|-----|-----|----------|-----------|---------------------------------|--|
| Lokiarch_46790                   | 149 | Phobius     | TRANSMEMBRANE          | Region of a membrane-bound protein predicted to be embedded in the membrane.                          | 31  | 54  | -        |           |                                 |  |
| Lokiarch_46790                   | 149 | Phobius     | CYTOPLASMIC_DOMAIN     | Region of a membrane-bound protein predicted to be outside the membrane, in the cytoplasm.            | 1   | 30  | -        |           |                                 |  |
| Lokiarch_46790                   | 149 | TMHMM       | TMhelix                | Region of a membrane-bound protein predicted to be embedded in the membrane.                          | 31  | 53  | -        |           |                                 |  |
| Lokiarch_46790                   | 149 | Phobius     | NON_CYTOPLASMIC_DOMAIN | Region of a membrane-bound protein predicted to be outside the membrane, in the extracellular region. | 55  | 149 | -        |           |                                 |  |
| Lokiarch_07660                   | 320 | Gene3D      | G3DSA:3.30.40.10       |                                                                                                       | 248 | 308 | 1.1E-4   | IPR013083 | Zinc finger, RING/FYVE/PHD-type |  |
| Lokiarch_07660                   | 320 | Coils       | Coil                   |                                                                                                       | 34  | 58  | -        |           |                                 |  |
| Lokiarch_07660                   | 320 | SUPERFAMILY | SSF57850               |                                                                                                       | 247 | 300 | 4.24E-5  |           |                                 |  |
| Lokiarch_34010                   | 175 | Gene3D      | G3DSA:3.30.40.10       |                                                                                                       | 115 | 164 | 7.2E-8   | IPR013083 | Zinc finger, RING/FYVE/PHD-type |  |
| Lokiarch_34010                   | 175 | SUPERFAMILY | SSF57850               |                                                                                                       | 115 | 164 | 1.8E-5   |           |                                 |  |
| <b>roadblock domain proteins</b> |     |             |                        |                                                                                                       |     |     |          |           |                                 |  |
| Lokiarch_02330                   | 153 | SUPERFAMILY | SSF103196              |                                                                                                       | 8   | 128 | 6.8E-19  |           |                                 |  |
| Lokiarch_02330                   | 153 | Pfam        | PF03259                | Roadblock/LC7 domain                                                                                  | 16  | 102 | 3.3E-9   | IPR004942 | Dynein light chain-related      |  |
| Lokiarch_02330                   | 153 | SMART       | SM00960                | Roadblock/LC7 domain                                                                                  | 11  | 103 | 5.0E-6   | IPR004942 | Dynein light chain-related      |  |
| Lokiarch_02330                   | 153 | Gene3D      | G3DSA:3.30.450.30      |                                                                                                       | 8   | 129 | 9.6E-20  |           |                                 |  |
| Lokiarch_03940                   | 142 | SMART       | SM00960                | Roadblock/LC7 domain                                                                                  | 17  | 106 | 3.9E-6   | IPR004942 | Dynein light chain-related      |  |
| Lokiarch_03940                   | 142 | Gene3D      | G3DSA:3.30.450.30      |                                                                                                       | 7   | 135 | 1.5E-13  |           |                                 |  |
| Lokiarch_03940                   | 142 | Coils       | Coil                   |                                                                                                       | 7   | 28  | -        |           |                                 |  |
| Lokiarch_03940                   | 142 | Pfam        | PF03259                | Roadblock/LC7 domain                                                                                  | 20  | 94  | 1.8E-9   | IPR004942 | Dynein light chain-related      |  |
| Lokiarch_03940                   | 142 | SUPERFAMILY | SSF103196              |                                                                                                       | 16  | 134 | 2.79E-12 |           |                                 |  |
| Lokiarch_06200                   | 131 | SMART       | SM00960                | Roadblock/LC7 domain                                                                                  | 5   | 98  | 7.7E-4   | IPR004942 | Dynein light chain-related      |  |
| Lokiarch_06200                   | 131 | Pfam        | PF03259                | Roadblock/LC7 domain                                                                                  | 7   | 83  | 7.4E-6   | IPR004942 | Dynein light chain-related      |  |
| Lokiarch_06200                   | 131 | SUPERFAMILY | SSF103196              |                                                                                                       | 3   | 98  | 2.09E-8  |           |                                 |  |
| Lokiarch_06200                   | 131 | Gene3D      | G3DSA:3.30.450.30      |                                                                                                       | 3   | 98  | 2.2E-8   |           |                                 |  |
| Lokiarch_06410                   | 135 | SUPERFAMILY | SSF103196              |                                                                                                       | 15  | 134 | 4.45E-29 |           |                                 |  |
| Lokiarch_06410                   | 135 | SMART       | SM00960                | Roadblock/LC7 domain                                                                                  | 22  | 111 | 4.3E-26  | IPR004942 | Dynein light chain-related      |  |
| Lokiarch_06410                   | 135 | Gene3D      | G3DSA:3.30.450.30      |                                                                                                       | 17  | 135 | 2.6E-27  |           |                                 |  |
| Lokiarch_06410                   | 135 | Pfam        | PF03259                | Roadblock/LC7 domain                                                                                  | 22  | 110 | 4.5E-20  | IPR004942 | Dynein light chain-related      |  |
| Lokiarch_06430                   | 117 | SMART       | SM00960                | Roadblock/LC7 domain                                                                                  | 8   | 96  | 0.0015   | IPR004942 | Dynein light chain-related      |  |
| Lokiarch_06430                   | 117 | Gene3D      | G3DSA:3.30.450.30      |                                                                                                       | 7   | 107 | 2.3E-6   |           |                                 |  |
| Lokiarch_06430                   | 117 | SUPERFAMILY | SSF103196              |                                                                                                       | 1   | 99  | 5.93E-9  |           |                                 |  |
| Lokiarch_06430                   | 117 | Pfam        | PF03259                | Roadblock/LC7 domain                                                                                  | 10  | 95  | 7.3E-8   | IPR004942 | Dynein light chain-related      |  |
| Lokiarch_06490                   | 100 | Pfam        | PF03259                | Roadblock/LC7 domain                                                                                  | 10  | 81  | 1.4E-11  | IPR004942 | Dynein light chain-related      |  |
| Lokiarch_06490                   | 100 | Gene3D      | G3DSA:3.30.450.30      |                                                                                                       | 7   | 99  | 4.8E-15  |           |                                 |  |
| Lokiarch_06490                   | 100 | SUPERFAMILY | SSF103196              |                                                                                                       | 7   | 99  | 5.1E-14  |           |                                 |  |
| Lokiarch_06490                   | 100 | SMART       | SM00960                | Roadblock/LC7 domain                                                                                  | 9   | 100 | 2.1E-8   | IPR004942 | Dynein light chain-related      |  |
| Lokiarch_08020                   | 117 | SMART       | SM00960                | Roadblock/LC7 domain                                                                                  | 5   | 93  | 5.9E-14  | IPR004942 | Dynein light chain-related      |  |
| Lokiarch_08020                   | 117 | SUPERFAMILY | SSF103196              |                                                                                                       | 3   | 117 | 1.69E-18 |           |                                 |  |
| Lokiarch_08020                   | 117 | Pfam        | PF03259                | Roadblock/LC7 domain                                                                                  | 7   | 91  | 2.4E-10  | IPR004942 | Dynein light chain-related      |  |
| Lokiarch_08020                   | 117 | Gene3D      | G3DSA:3.30.450.30      |                                                                                                       | 3   | 116 | 2.4E-18  |           |                                 |  |
| Lokiarch_25010                   | 117 | SUPERFAMILY | SSF103196              |                                                                                                       | 3   | 117 | 1.96E-19 |           |                                 |  |
| Lokiarch_25010                   | 117 | Gene3D      | G3DSA:3.30.450.30      |                                                                                                       | 3   | 117 | 1.1E-18  |           |                                 |  |
| Lokiarch_25010                   | 117 | Pfam        | PF03259                | Roadblock/LC7 domain                                                                                  | 7   | 91  | 1.7E-11  | IPR004942 | Dynein light chain-related      |  |
| Lokiarch_25010                   | 117 | SMART       | SM00960                | Roadblock/LC7 domain                                                                                  | 5   | 93  | 2.1E-14  | IPR004942 | Dynein light chain-related      |  |
| Lokiarch_41940                   | 125 | Gene3D      | G3DSA:3.30.450.30      |                                                                                                       | 8   | 125 | 3.3E-27  |           |                                 |  |
| Lokiarch_41940                   | 125 | SMART       | SM00960                | Roadblock/LC7 domain                                                                                  | 11  | 101 | 8.1E-26  | IPR004942 | Dynein light chain-related      |  |
| Lokiarch_41940                   | 125 | Pfam        | PF03259                | Roadblock/LC7 domain                                                                                  | 13  | 100 | 6.5E-20  | IPR004942 | Dynein light chain-related      |  |
| Lokiarch_41940                   | 125 | SUPERFAMILY | SSF103196              |                                                                                                       | 4   | 124 | 4.97E-29 |           |                                 |  |
| Lokiarch_43650                   | 123 | SUPERFAMILY | SSF103196              |                                                                                                       | 1   | 122 | 5.41E-23 |           |                                 |  |
| Lokiarch_43650                   | 123 | Gene3D      | G3DSA:3.30.450.30      |                                                                                                       | 2   | 122 | 1.4E-22  |           |                                 |  |
| Lokiarch_43650                   | 123 | SMART       | SM00960                | Roadblock/LC7 domain                                                                                  | 8   | 98  | 7.6E-15  | IPR004942 | Dynein light chain-related      |  |
| Lokiarch_43650                   | 123 | Pfam        | PF03259                | Roadblock/LC7 domain                                                                                  | 20  | 97  | 3.8E-14  | IPR004942 | Dynein light chain-related      |  |
| Lokiarch_44990                   | 249 | Coils       | Coil                   |                                                                                                       | 1   | 22  | -        |           |                                 |  |
| Lokiarch_44990                   | 249 | Gene3D      | G3DSA:3.30.450.30      |                                                                                                       | 149 | 236 | 9.0E-5   |           |                                 |  |
| Lokiarch_44990                   | 249 | SUPERFAMILY | SSF103196              |                                                                                                       | 146 | 240 | 3.31E-7  |           |                                 |  |
| Lokiarch_44990                   | 249 | SMART       | SM00960                | Roadblock/LC7 domain                                                                                  | 141 | 226 | 5.4E-4   | IPR004942 | Dynein light chain-related      |  |
| Lokiarch_54060                   | 142 | SUPERFAMILY | SSF103196              |                                                                                                       | 22  | 133 | 4.19E-11 |           |                                 |  |
| Lokiarch_54060                   | 142 | SMART       | SM00960                | Roadblock/LC7 domain                                                                                  | 17  | 118 | 6.3E-7   | IPR004942 | Dynein light chain-related      |  |
| Lokiarch_54060                   | 142 | Pfam        | PF03259                | Roadblock/LC7 domain                                                                                  | 20  | 94  | 1.5E-9   | IPR004942 | Dynein light chain-related      |  |
| Lokiarch_54060                   | 142 | Gene3D      | G3DSA:3.30.450.30      |                                                                                                       | 7   | 135 | 3.7E-12  |           |                                 |  |

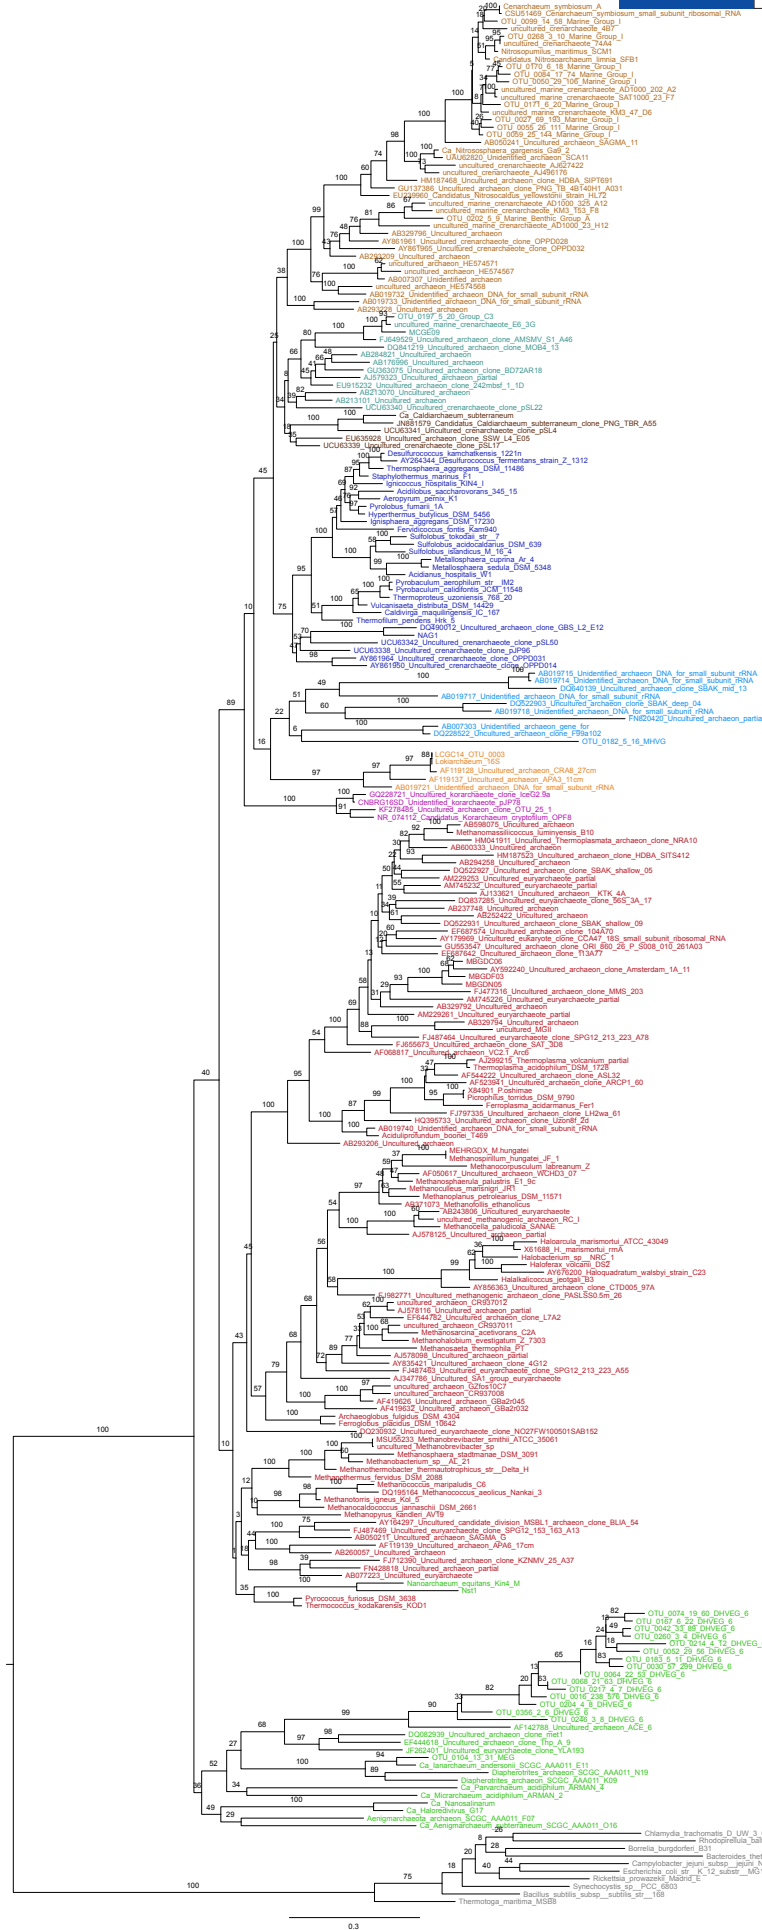

Suppl. Figure S1: Diversity of archaeal taxa identified in LCGC14 sediments. Maximum likelihood phylogeny of OTUs derived from the LCGC14 16S rDNA amplicon sequences. Major archaeal groups are coloured as follows: grey, Bacteria; green, DPANN, red, Furycarchaeota; pink, Korarchaeota; light orange, DSAG; light blue, MHVG; dark blue, Crenarchaeota; brown, Aigarchaeota; teal, MCG and C3; dark orange, Thaumarchaeota.



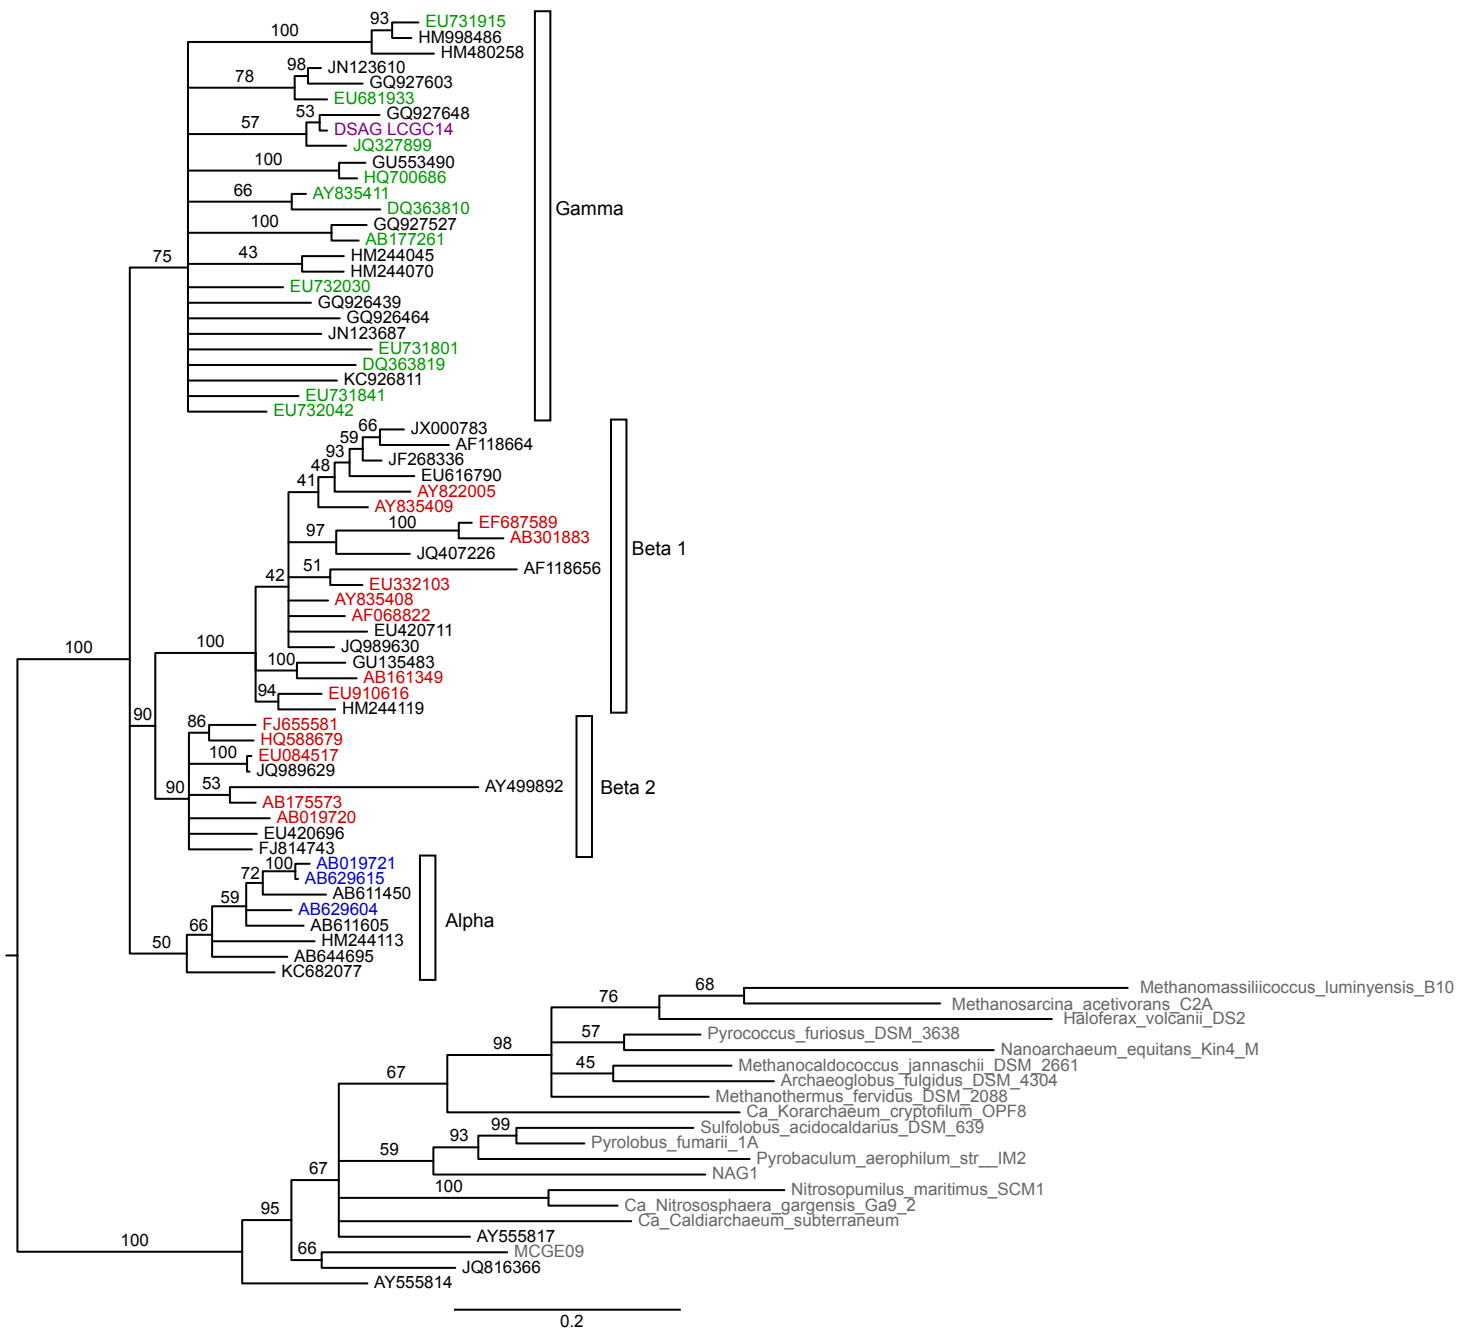

**Suppl. Figure S2: Maximum likelihood phylogeny of DSAG diversity in LCGC14 sediments.** The phylogenetic tree shows the full phylogenetic diversity of DSAG currently available in the SILVA database (release 119). Outgroup sequences representing all other archaeal phyla are given in grey. Sequences that were classified as alpha, beta and gamma in are given in blue, red and green respectively. Related sequences identified with BLAST versus the SILVA database are given in black. The single sequence from the OTU that was classified as DSAG in this study is depicted in purple.

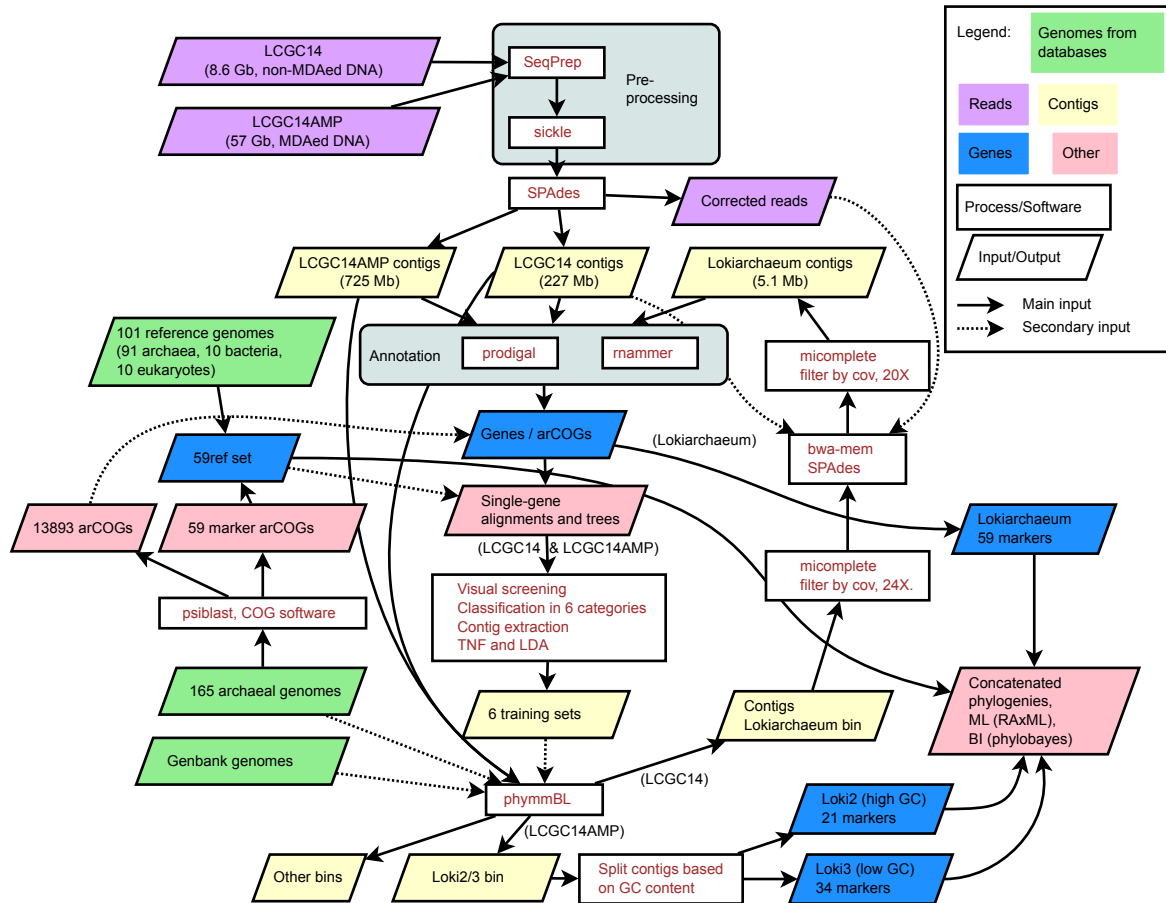

**Suppl. Figure S3: Full schematic overview of metagenomics approach.** This flowchart summarizes which data and software were used, starting from raw reads, to obtain the marker genes used throughout this contribution, including in phylogenetic reconstructions. See the legend in the top-right corner for more details on the meaning of colours and symbols.

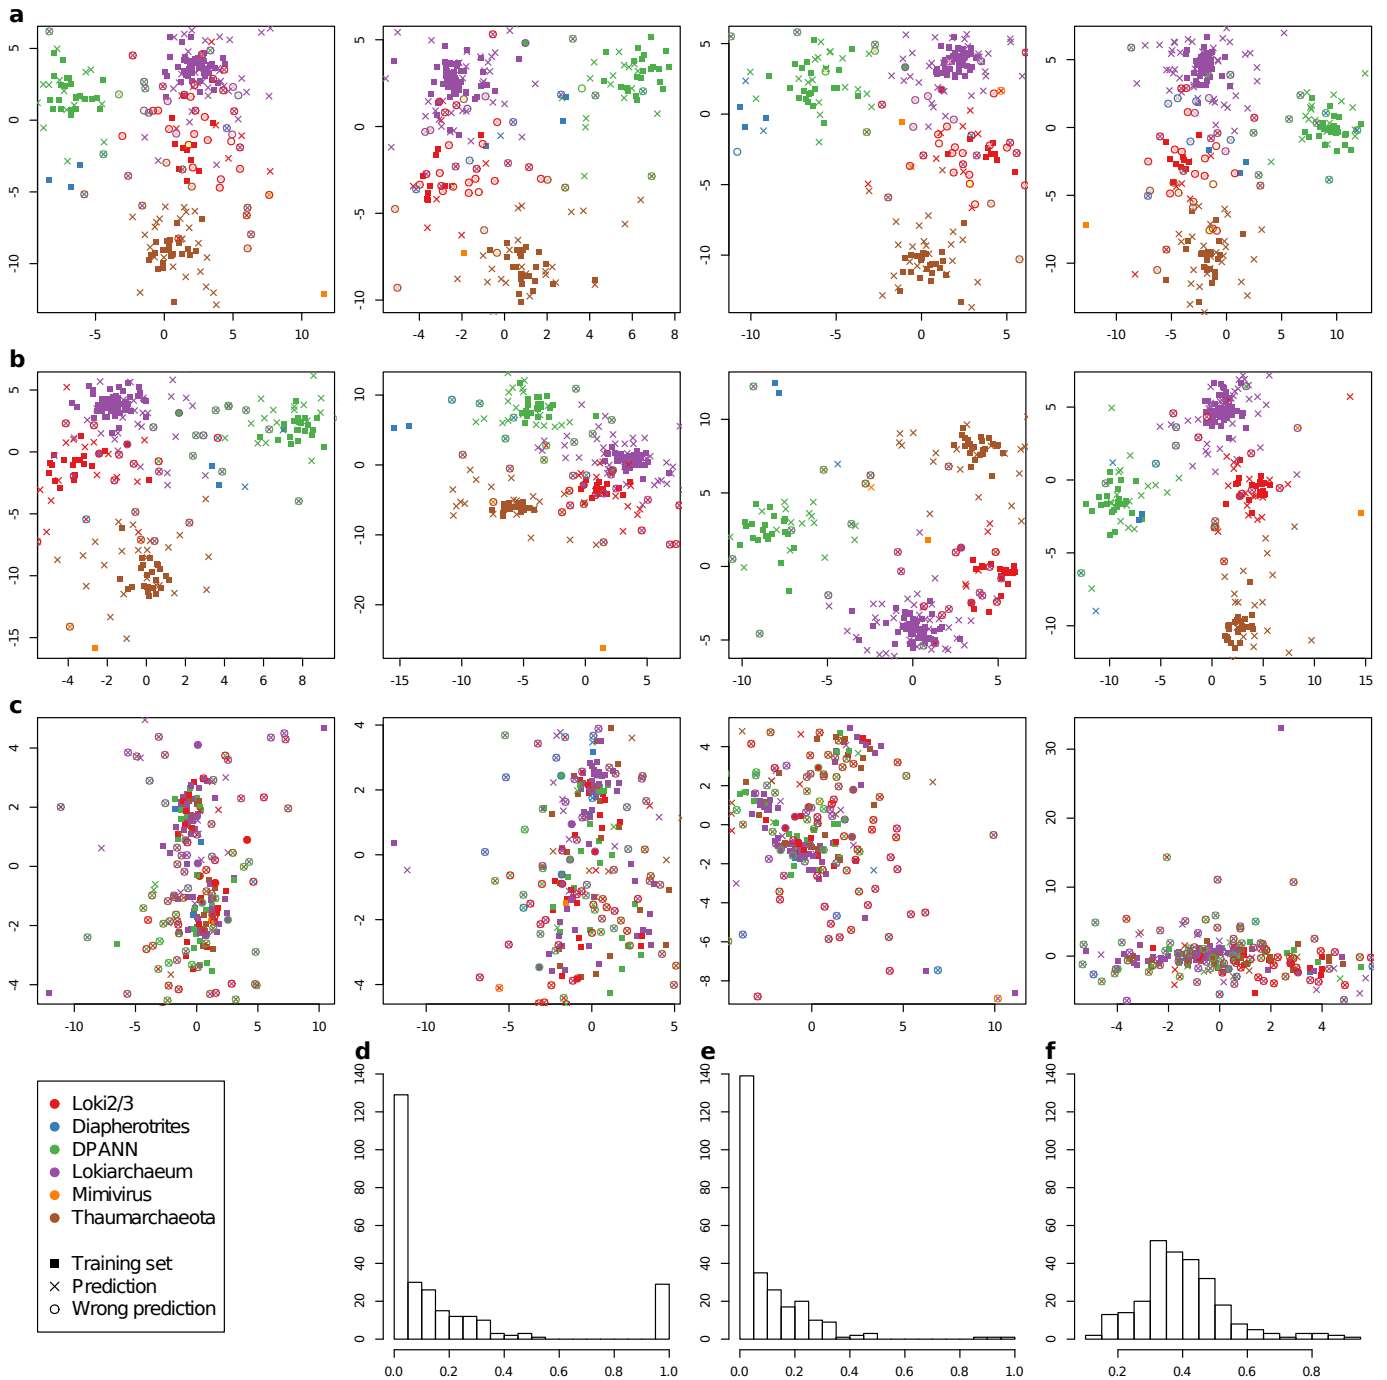

**Suppl. Figure S4: Quality control of the training sets used in the binning procedure.** a-c: Results of the linear discriminant analysis (LDA) for the initial (a) and second (b) rounds of training set benchmarking, and for a round where categories have been randomized (c). In each panel, four out of the 100 repetitions of contig selection, LDA calculation and LDA prediction are represented. The x-axis and y-axis are the first and second axis of the LDA, respectively. Each point represents a contig from the training sets, colour-coded by category: red, Loki2/3; blue, Diapherotrites; green, DPANN; purple, Lokiarchaeum; orange, Mimivirus; brown, Thaumarchaeota (see legend in the bottom left corner of the figure). In a, the putative classifications are marked with a lighter colour. Contigs used for LDA calculation are shown as squares, predictions as crosses. Whenever the classification and the LDA prediction disagree, the dot is circled with the colour of the LDA prediction. By definition, all putative classifications are shown as incorrect, since putative categories were not included in the LDA calculation. d-f: histograms showing the fraction of wrong predictions for the initial (d), second (e) and randomized (f) rounds of LDA.

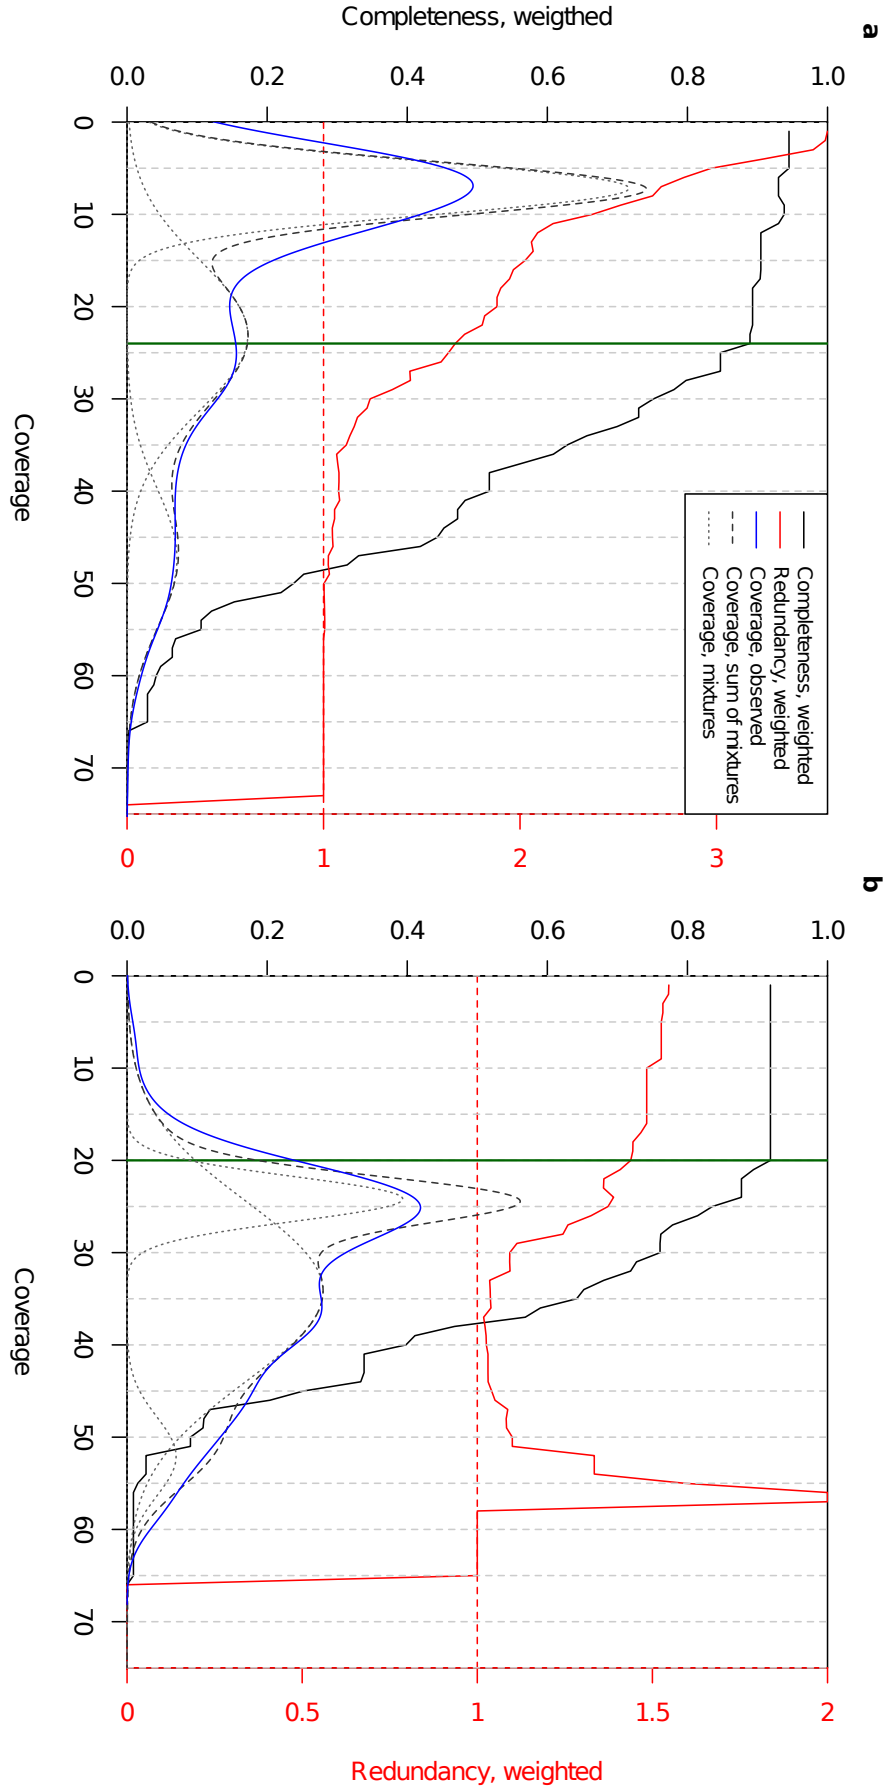

**Suppl. Figure S5: Completeness and redundancy analyses of contigs of the *Lokiarchaeum* bin.** Completeness and redundancy of *Lokiarchaeum* contigs was assessed before (a) and after reassembly of the corresponding reads (b), with increasing coverage thresholds. For each value of the threshold (x-axis), the weighted completeness and redundancy of the contigs with only this coverage and above was estimated (see methods for details). Completeness is shown in solid black lines (y-axis to the left of the plot) and redundancy with solid red lines (y-axis to the right of the plot). In addition, the distribution of coverage on contigs larger than 5 kb is shown with a blue, solid line. This distribution was fitted with three normal distributions (shown in grey, dotted lines) using a mixture model. The sum of the three fitted distributions is shown with a black, solid line. The selected cut-offs (24X and 20X for a and b, respectively) are indicated with a vertical, dark green line.

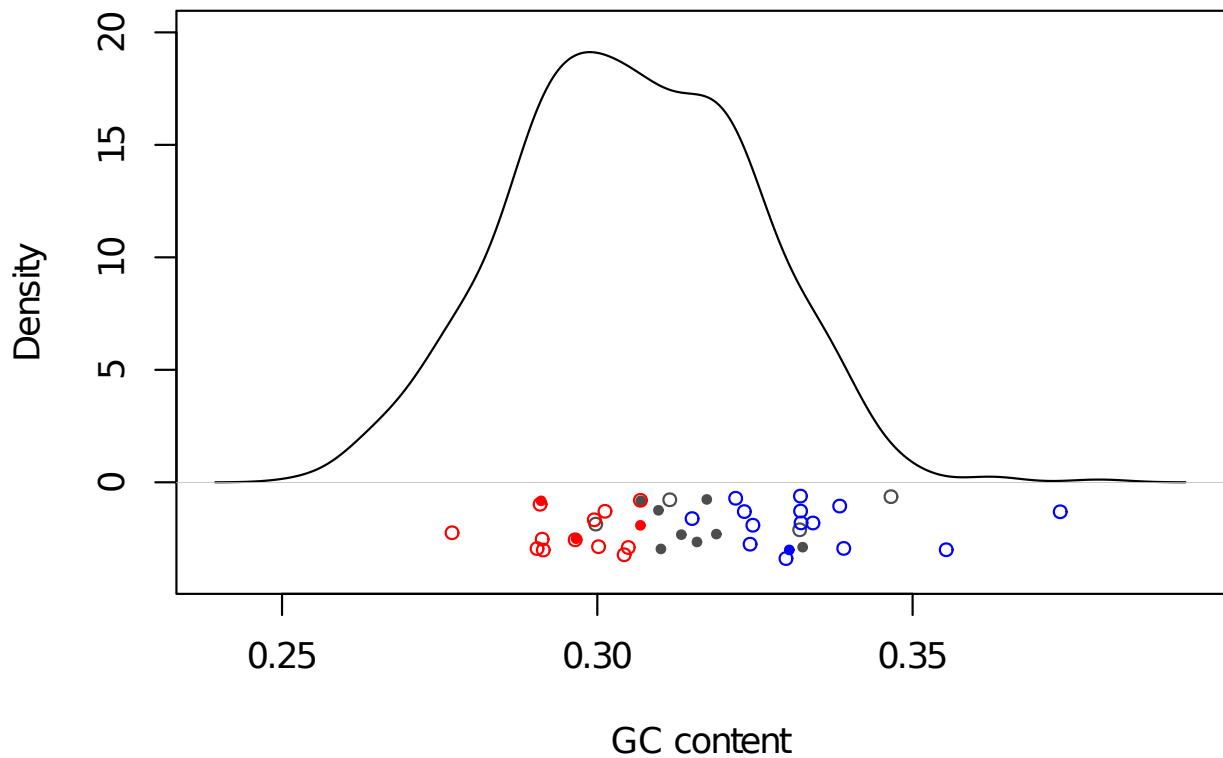

**Suppl. Figure S6: GC-content-based separation of Loki2 and Loki3 contigs.** The density curve shows the GC content distribution of contigs larger than 5 kbp in the Loki2/3 bin. Contigs carrying taxonomic markers of the '59ref set' identified during the analysis of LCGC14AMP and present in two copies are represented by open circles, contigs with single-copy taxonomic markers by closed circles. Contigs attributed to Loki2 (high GC) and Loki3 (low GC) are marked in blue and red, respectively; non-attributed contigs in grey. Position of circles on the y-axis was jittered to improve readability.

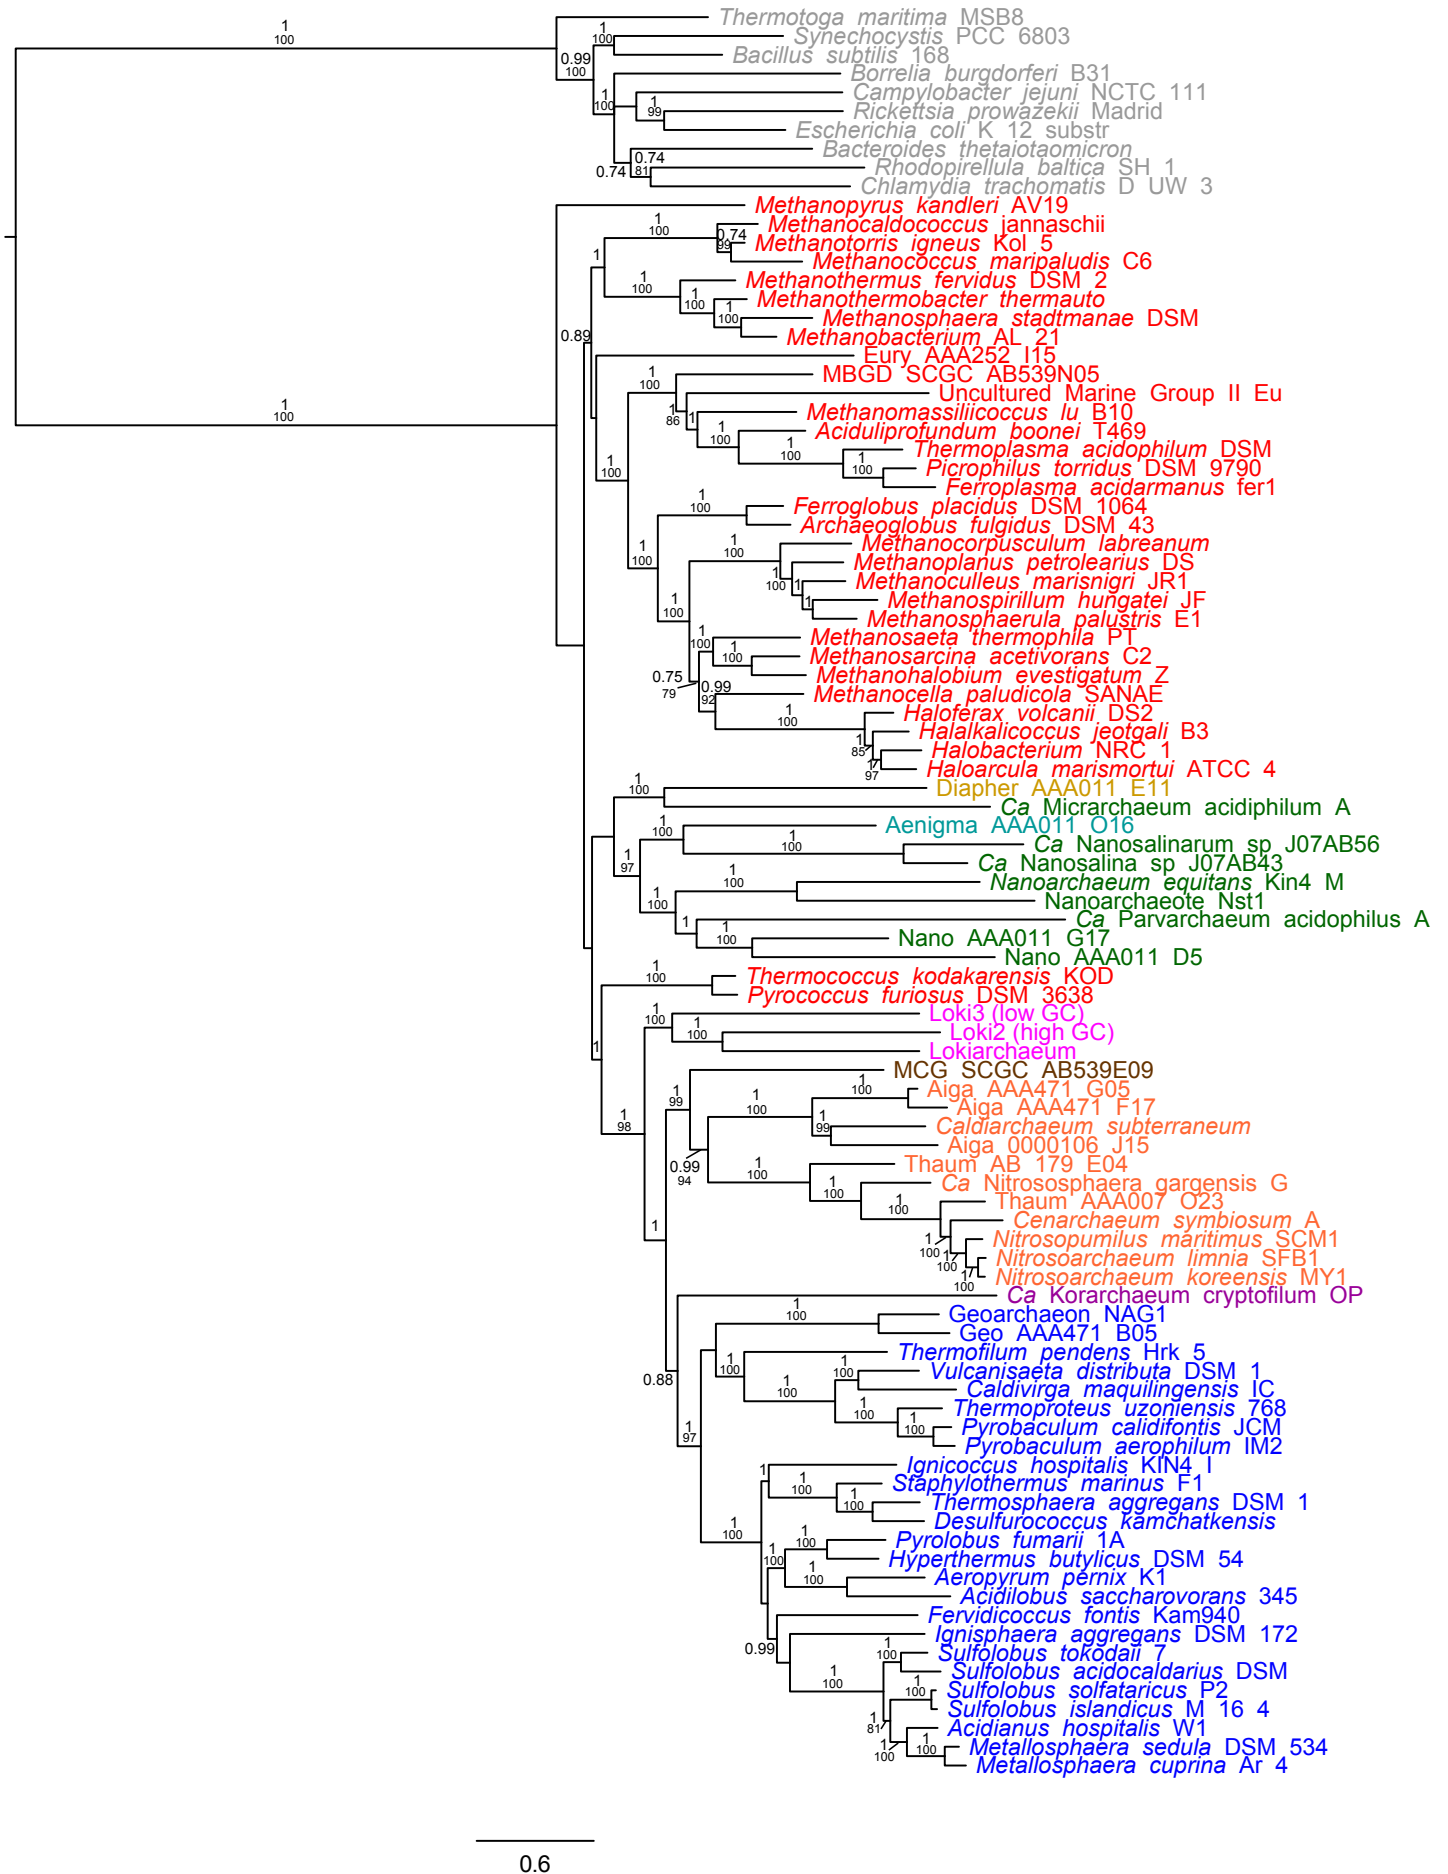

**Suppl. Figure S7: Lokiarchaeota represent a deeply-rooting clade of the TACK superphylum.** Bayesian and Maximum likelihood analysis based on a concatenation of the alignment of 36 highly conserved bacterial and archaeal proteins. The phylogenetic tree shows high support for the proposed Lokiarchaeota phylum (comprising Lokiarchaeum, Loki2 and Loki3), representing a deeply-rooting clade of the TACK superphylum. Sequences were aligned with Mafft-LINSi v. 7.130b, positions with >50% gaps were removed. The phylogeny was inferred with PhyloBayes MPI 1.5a25, using the CAT model and a GTR substitution matrix. Numbers above branches show posterior probabilities (PP) of Bayesian phylogeny only if they were > 0.8, and maximum-likelihood bootstrap supports (BS) > 70. The scale represents the number of substitutions per site. Higher taxonomic groups are colour-coded: grey, Bacteria; blue, Crenarchaeota; red, Euryarchaeota; orange, Aig- and Thaumarchaeota; green, Nano- and Nanohaloarchaeota; yellow, Diapherotrites; teal, Aenigmarchaeota; brown, Miscellaneous Crenarchaeal Group (MCG); purple, Korarchaeota; pink, Lokiarchaeota.

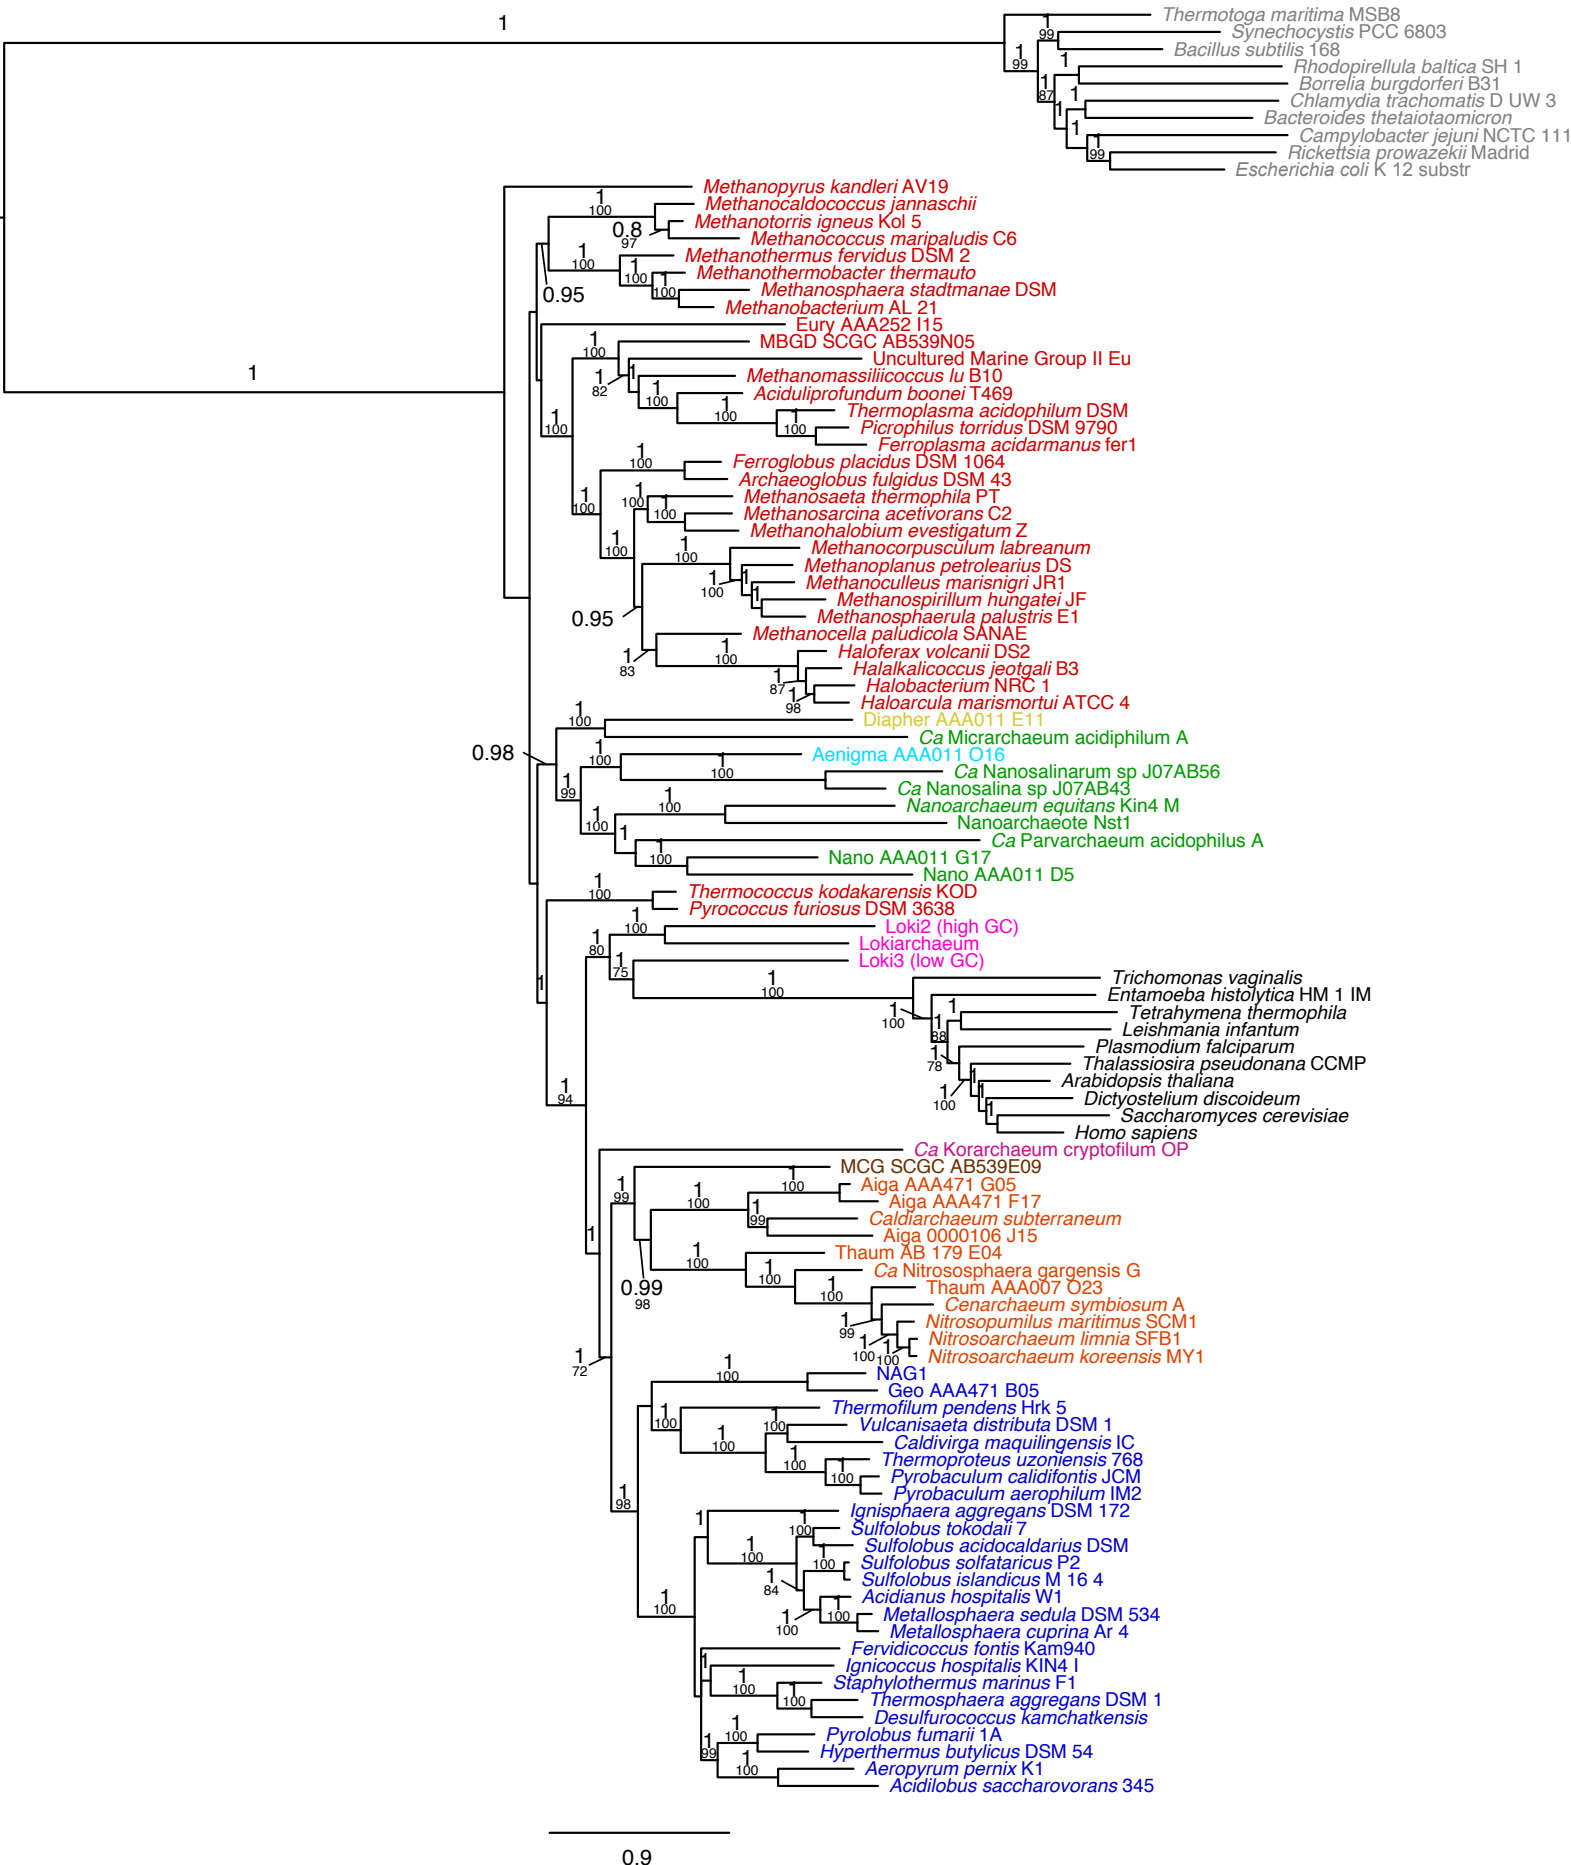

**Suppl. Figure S8: Eukaryotes are placed within the Lokiarchaeota in the Tree of Life.** Bayesian phylogeny based on a concatenation of the alignment of 36 highly conserved proteins. In the phylogenetic tree, eukaryotes are placed within the Lokiarchaeota with high support (PP=1; BS=80). The scale represents the number of substitutions per site. Methods, colour coding and scale as described in Suppl. Figure S7.

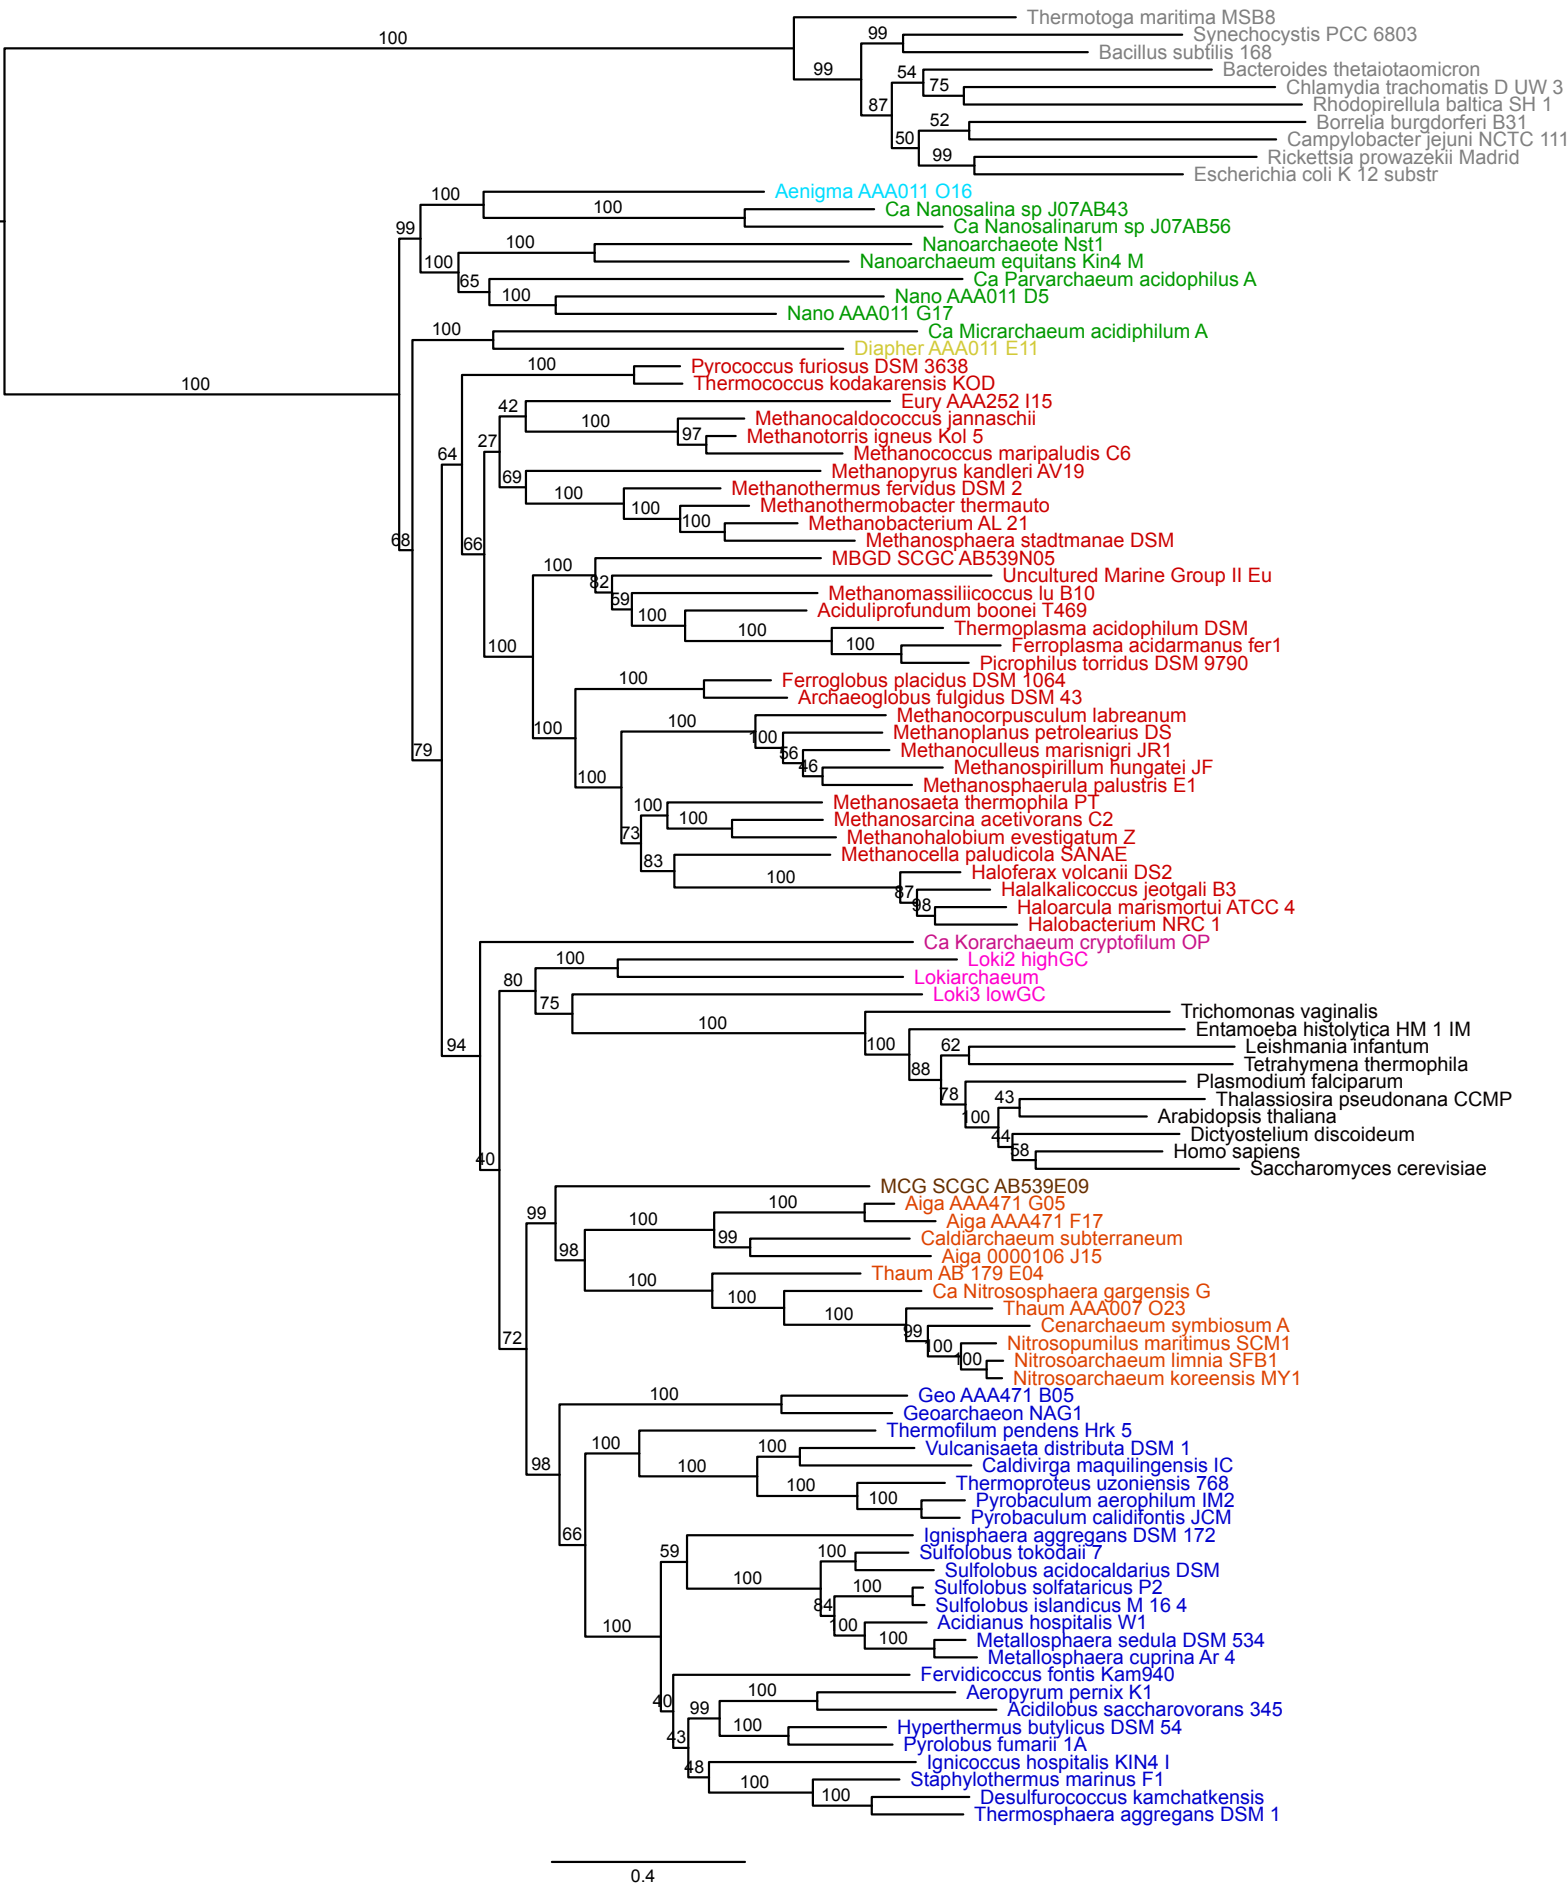

Suppl. Figure S9: Maximum likelihood phylogeny based on datasets and analysis described for Suppl. Figure S8. Numbers on branches indicate bootstrap support. Colour coding, bootstraps and scale as described in Suppl. Figure S7.



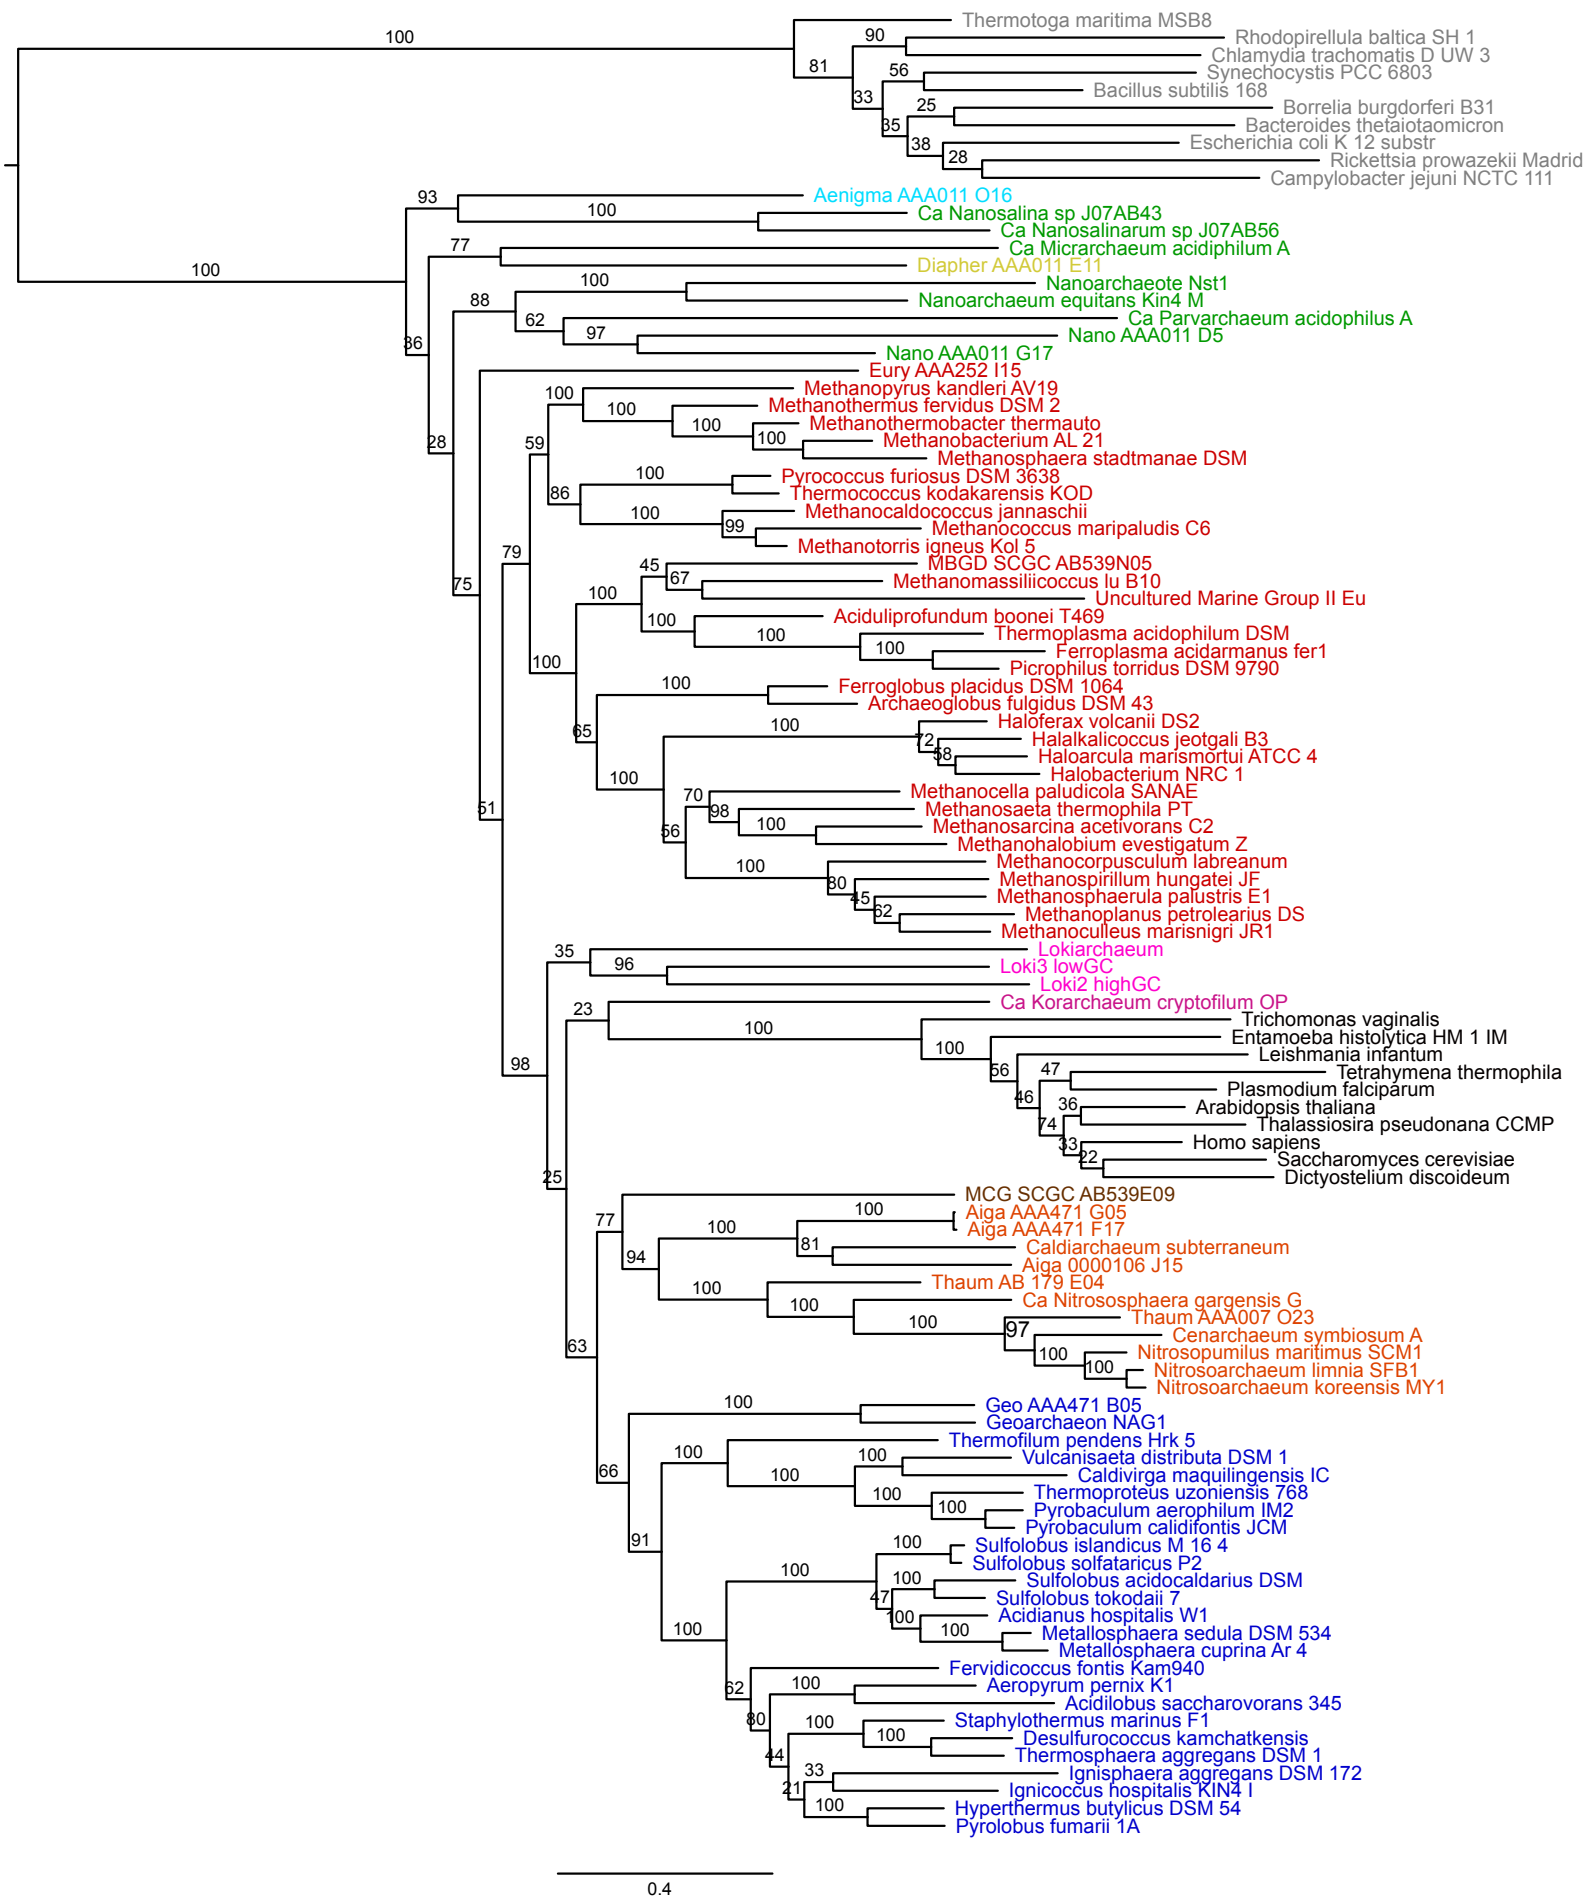

Suppl. Figure S10: Maximum likelihood phylogeny of ribosomal protein markers (21 markers, Suppl. Table S2). Methods, colour coding and scale as described in Suppl. Figure S7.

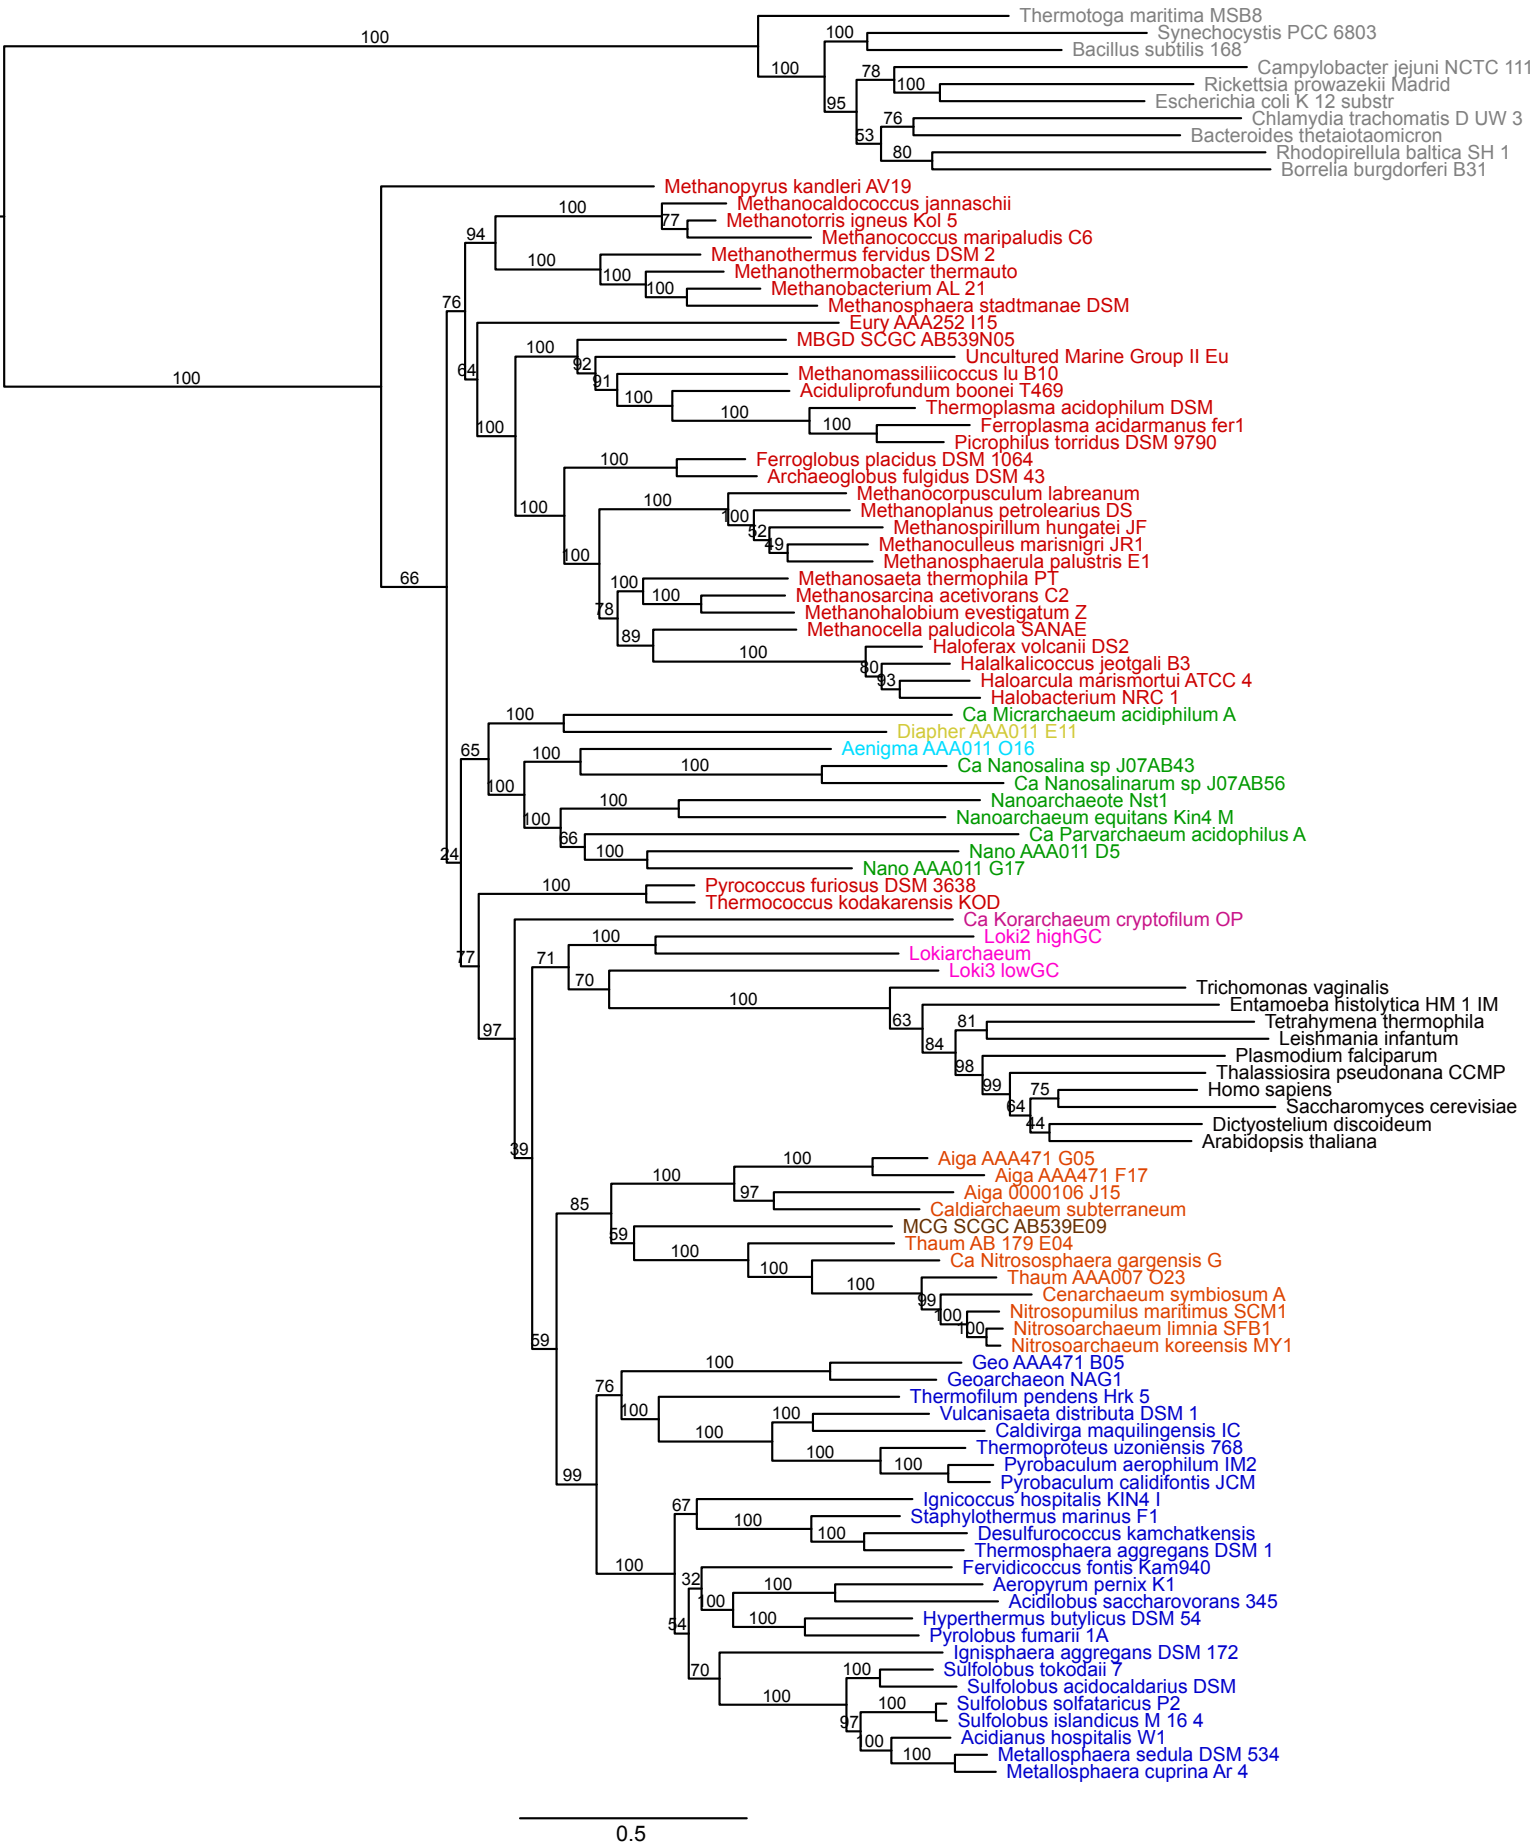

Suppl. Figure S11: Maximum likelihood phylogeny of non-ribosomal protein markers (15 markers; Suppl. Table S2). Methods, colour coding and scale as described in Suppl. Figure S7.

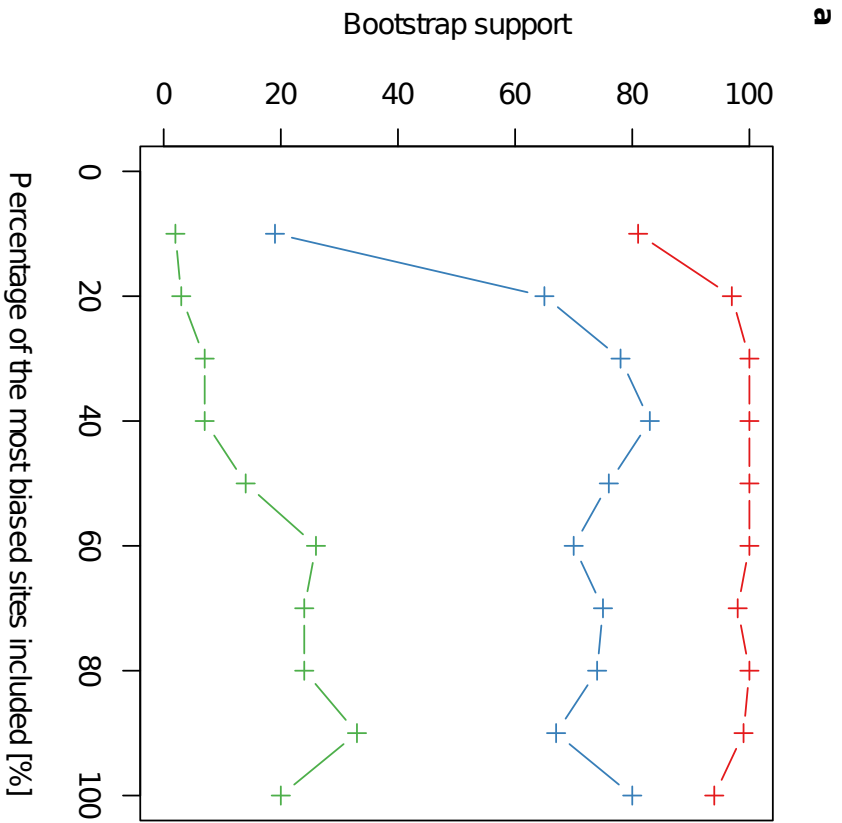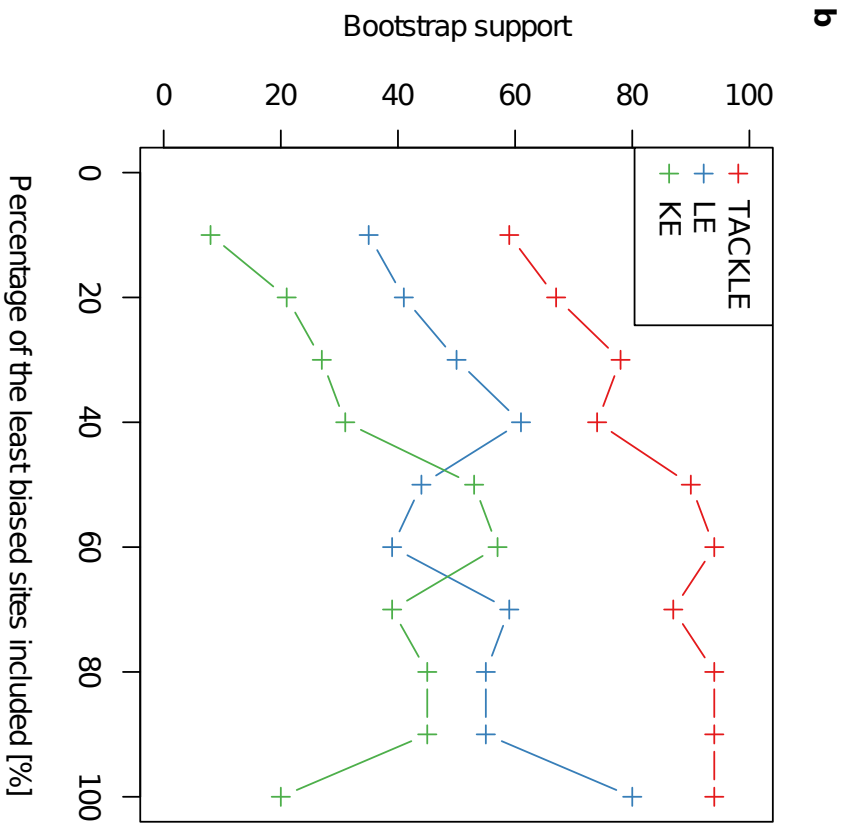

**Suppl. Figure S12: Compositional bias analyses support the Lokiarchaecota-Eukarya affiliation.** Effect of removal of compositional bias on the phylogenomic affiliation of Lokiarchaecum and eukaryotes is shown (a-b). The sites of the concatenated alignment of 36 conserved proteins were ranked according to their compositional bias, and increasing amounts (x-axis) of either the most (a) or the least (b) biased sites were included in maximum likelihood phylogeny. Alignment, position trimming and phylogenies were performed as in Suppl. Figure S7. In each phylogeny, the bootstrap support of three bipartitions was recorded (y-axis). The three tested bipartitions correspond to (i) the TACK superphylum, Lokiarchaecota and Eukaryotes forming a clade (TACKLE, red); (ii) Lokiarchaecota being associated with Eukaryotes (LE, blue); (iii) Korarchaeota being associated with eukaryotes (KE, green).

## Supplementary Figure S13

The figure panels can be  
found on the next pages

**Suppl. Figure S13: Effect of taxon removal on the phylogenomic affiliation between Lokiarchaeum and eukaryotes.** Maximum likelihood phylogenies based on a concatenation of the alignment of 36 highly conserved marker proteins, as in Suppl. Figure S7, from which various taxa have been removed. See Suppl. Table S5 for a summary. Taxa removed were: Lokiarchaeum (**a**), Loki2 and Loki3 (**b**), all Lokiarchaeota (**c**), Bacteria (**d**), Eukarya (**e**), Bacteria and Eukarya (**f**), DPANN archaea (**g**), Euryarchaeota (**h**), Thaumarchaeota (**i**), Crenarchaeota (**j**), Aigarchaeota (**k**), Korarchaeota (**l**) and SAGs (**m**). Colour-coding, bootstraps and scale as in Suppl. Figure S7.

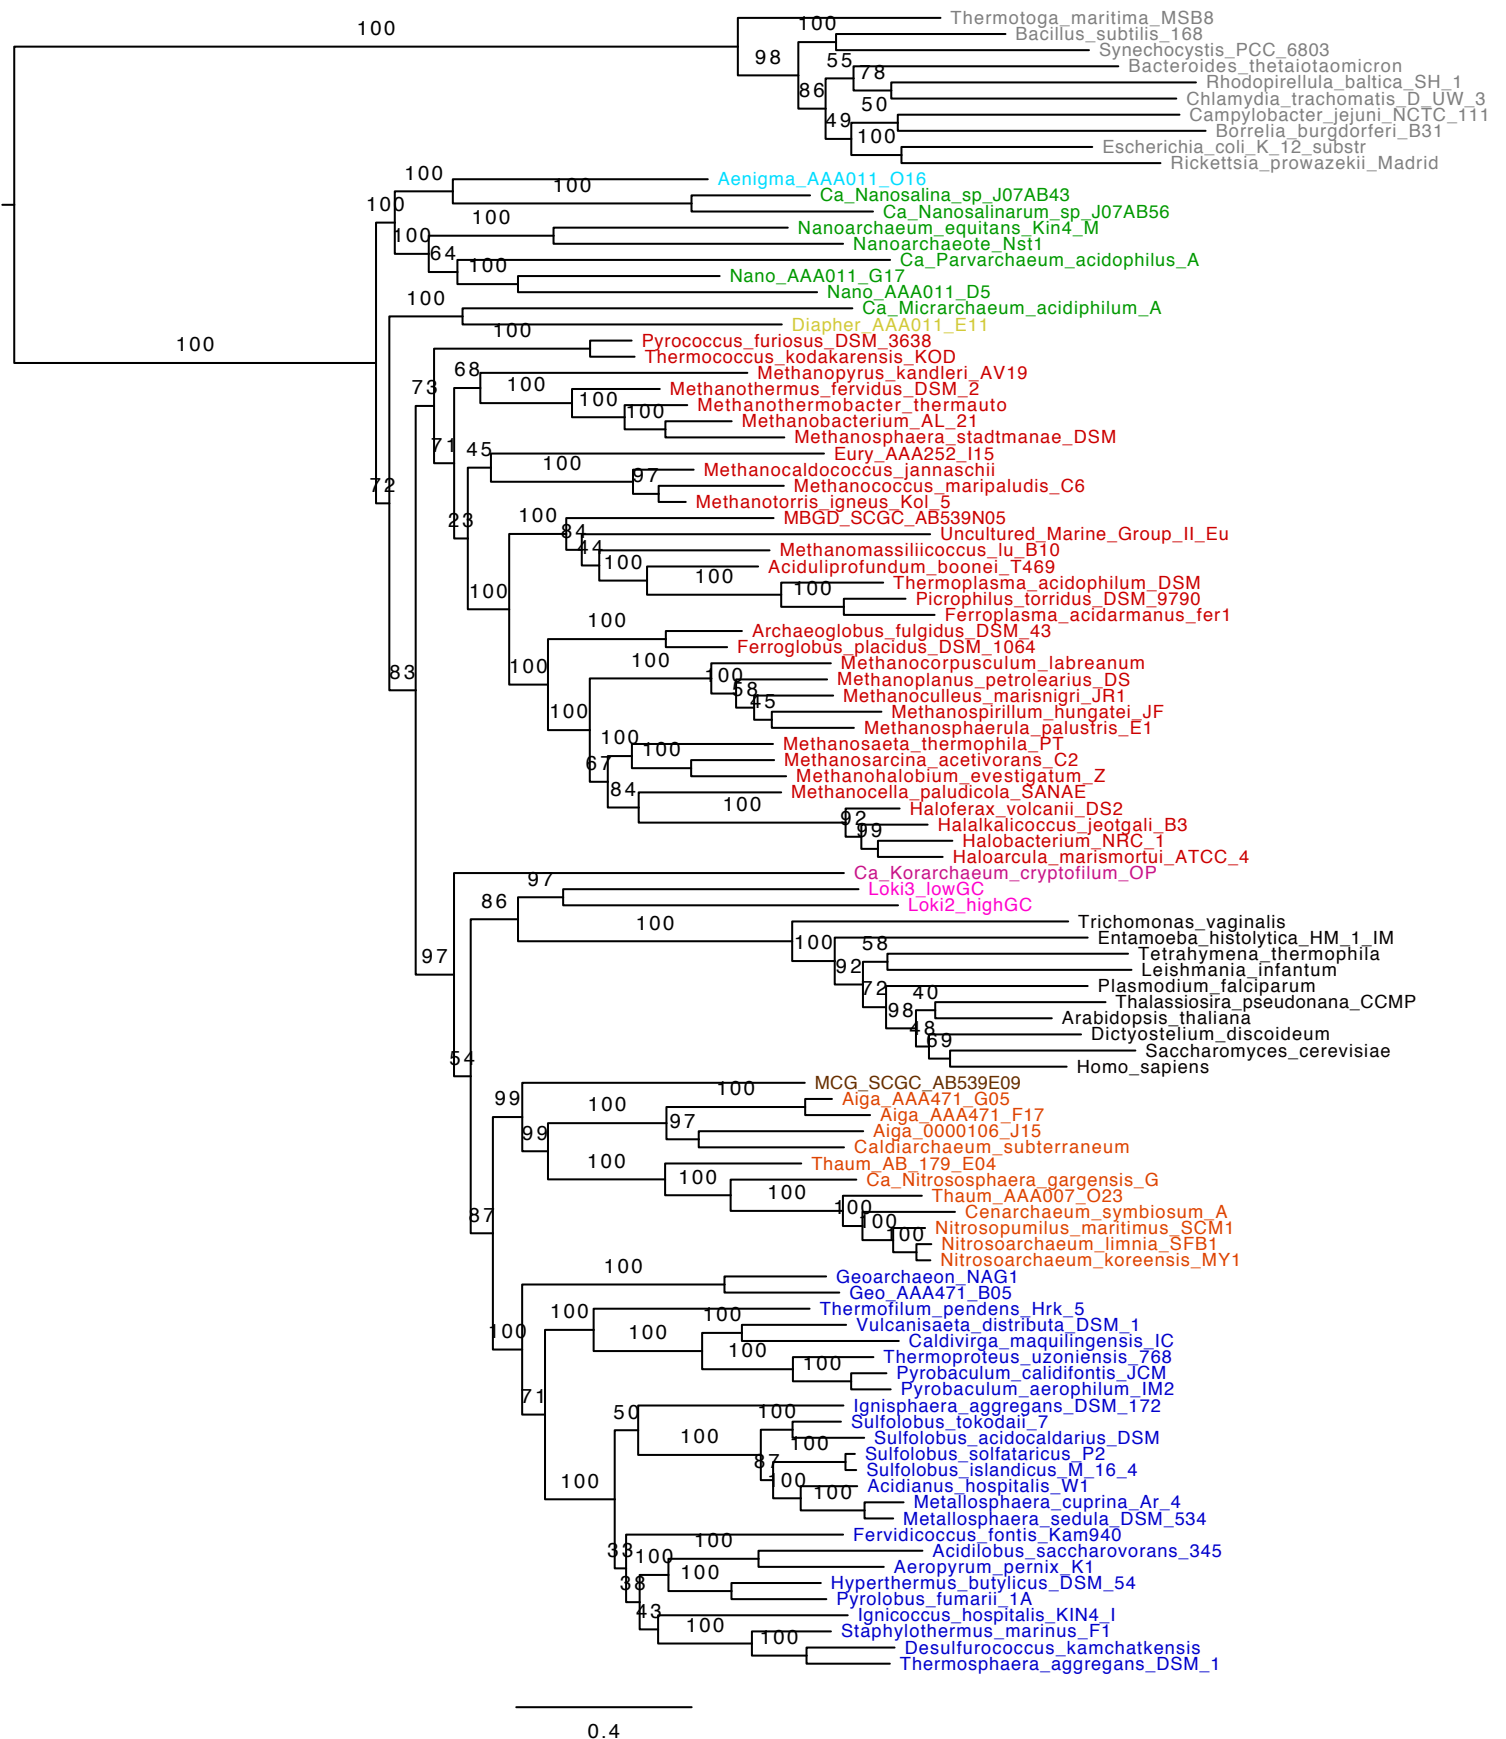

Supp. Fig. S13a: 36 conserved arCOGs, without Lokiarchaeum / RAxML / PROTGAMMALG

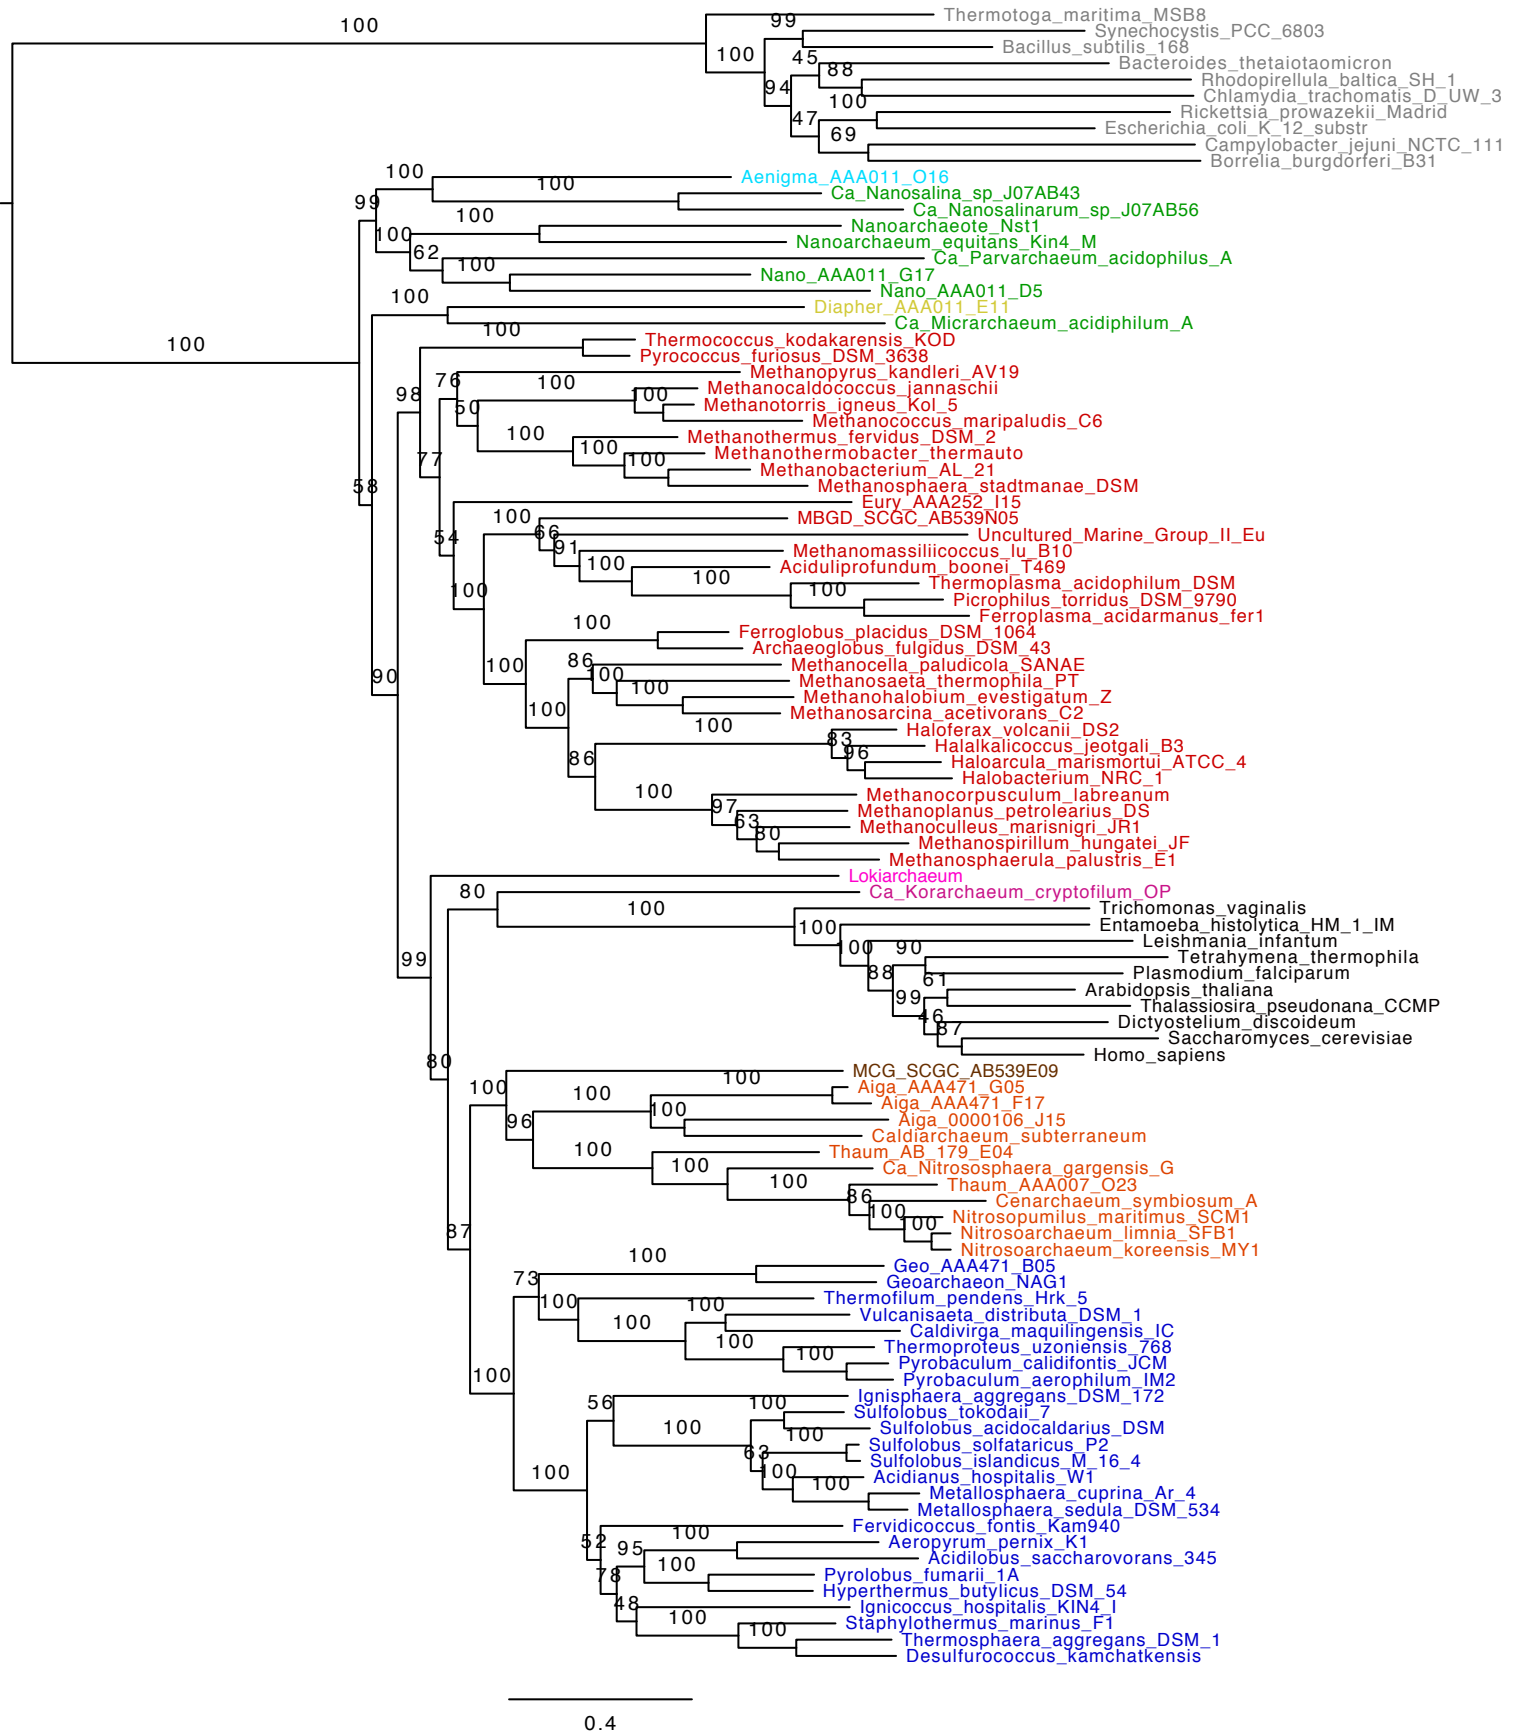

Supp. Fig. S13b: 58 conserved arCOGs, without Loki2/Loki3 / RAxML / PROTGAMMALG

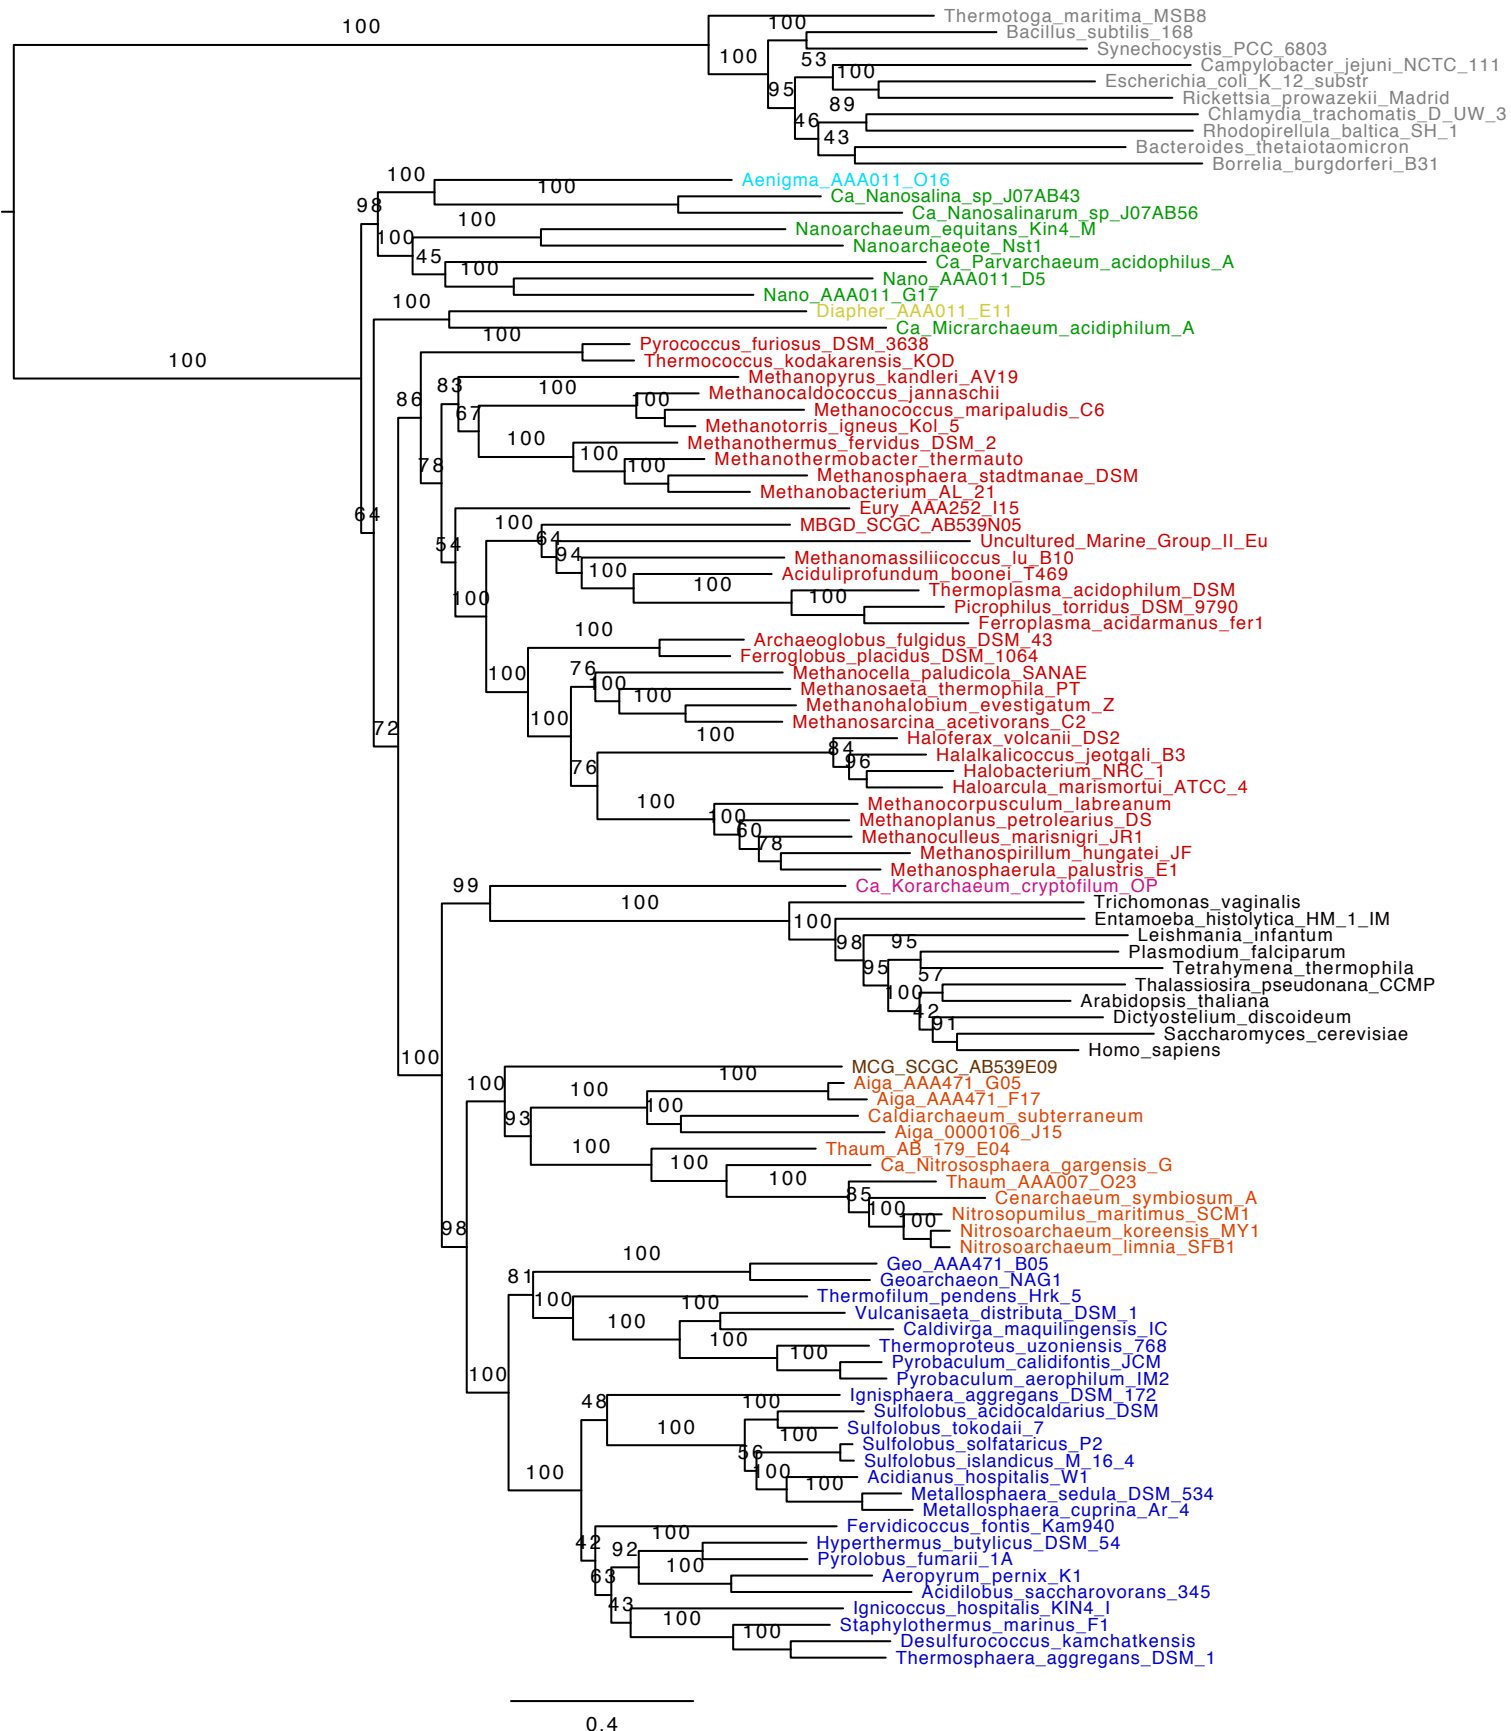

Supp. Fig. S13c: 58 conserved arCOGs, without Lokiarchaeum/Loki2/Loki3 / RAXML / PROTGAMMALG



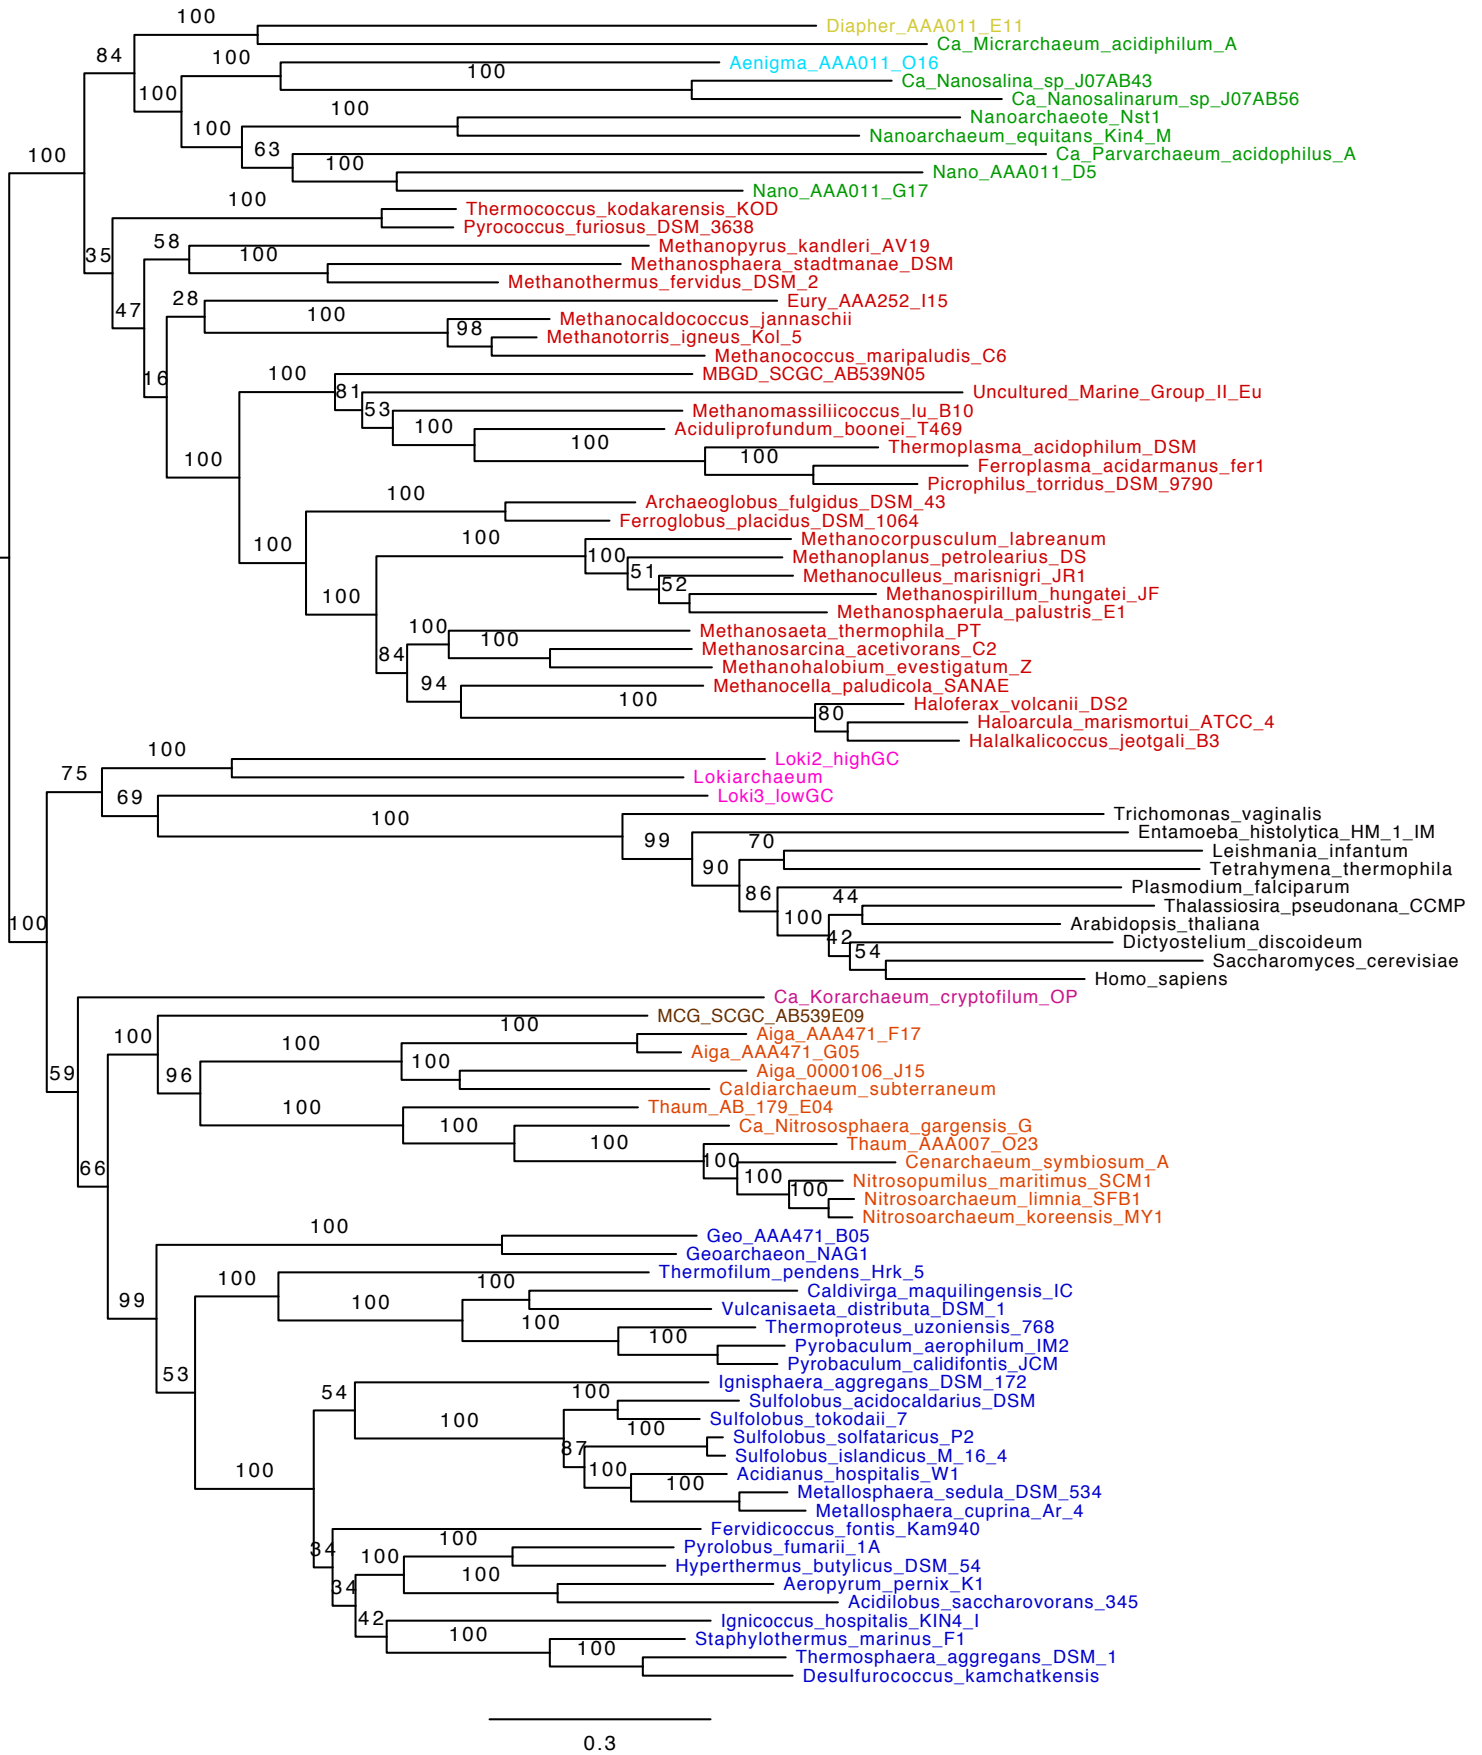

Supp. Fig. S13d: 36 conserved arCOGs, without Bacteria / RAxML / PROTGAMMALG

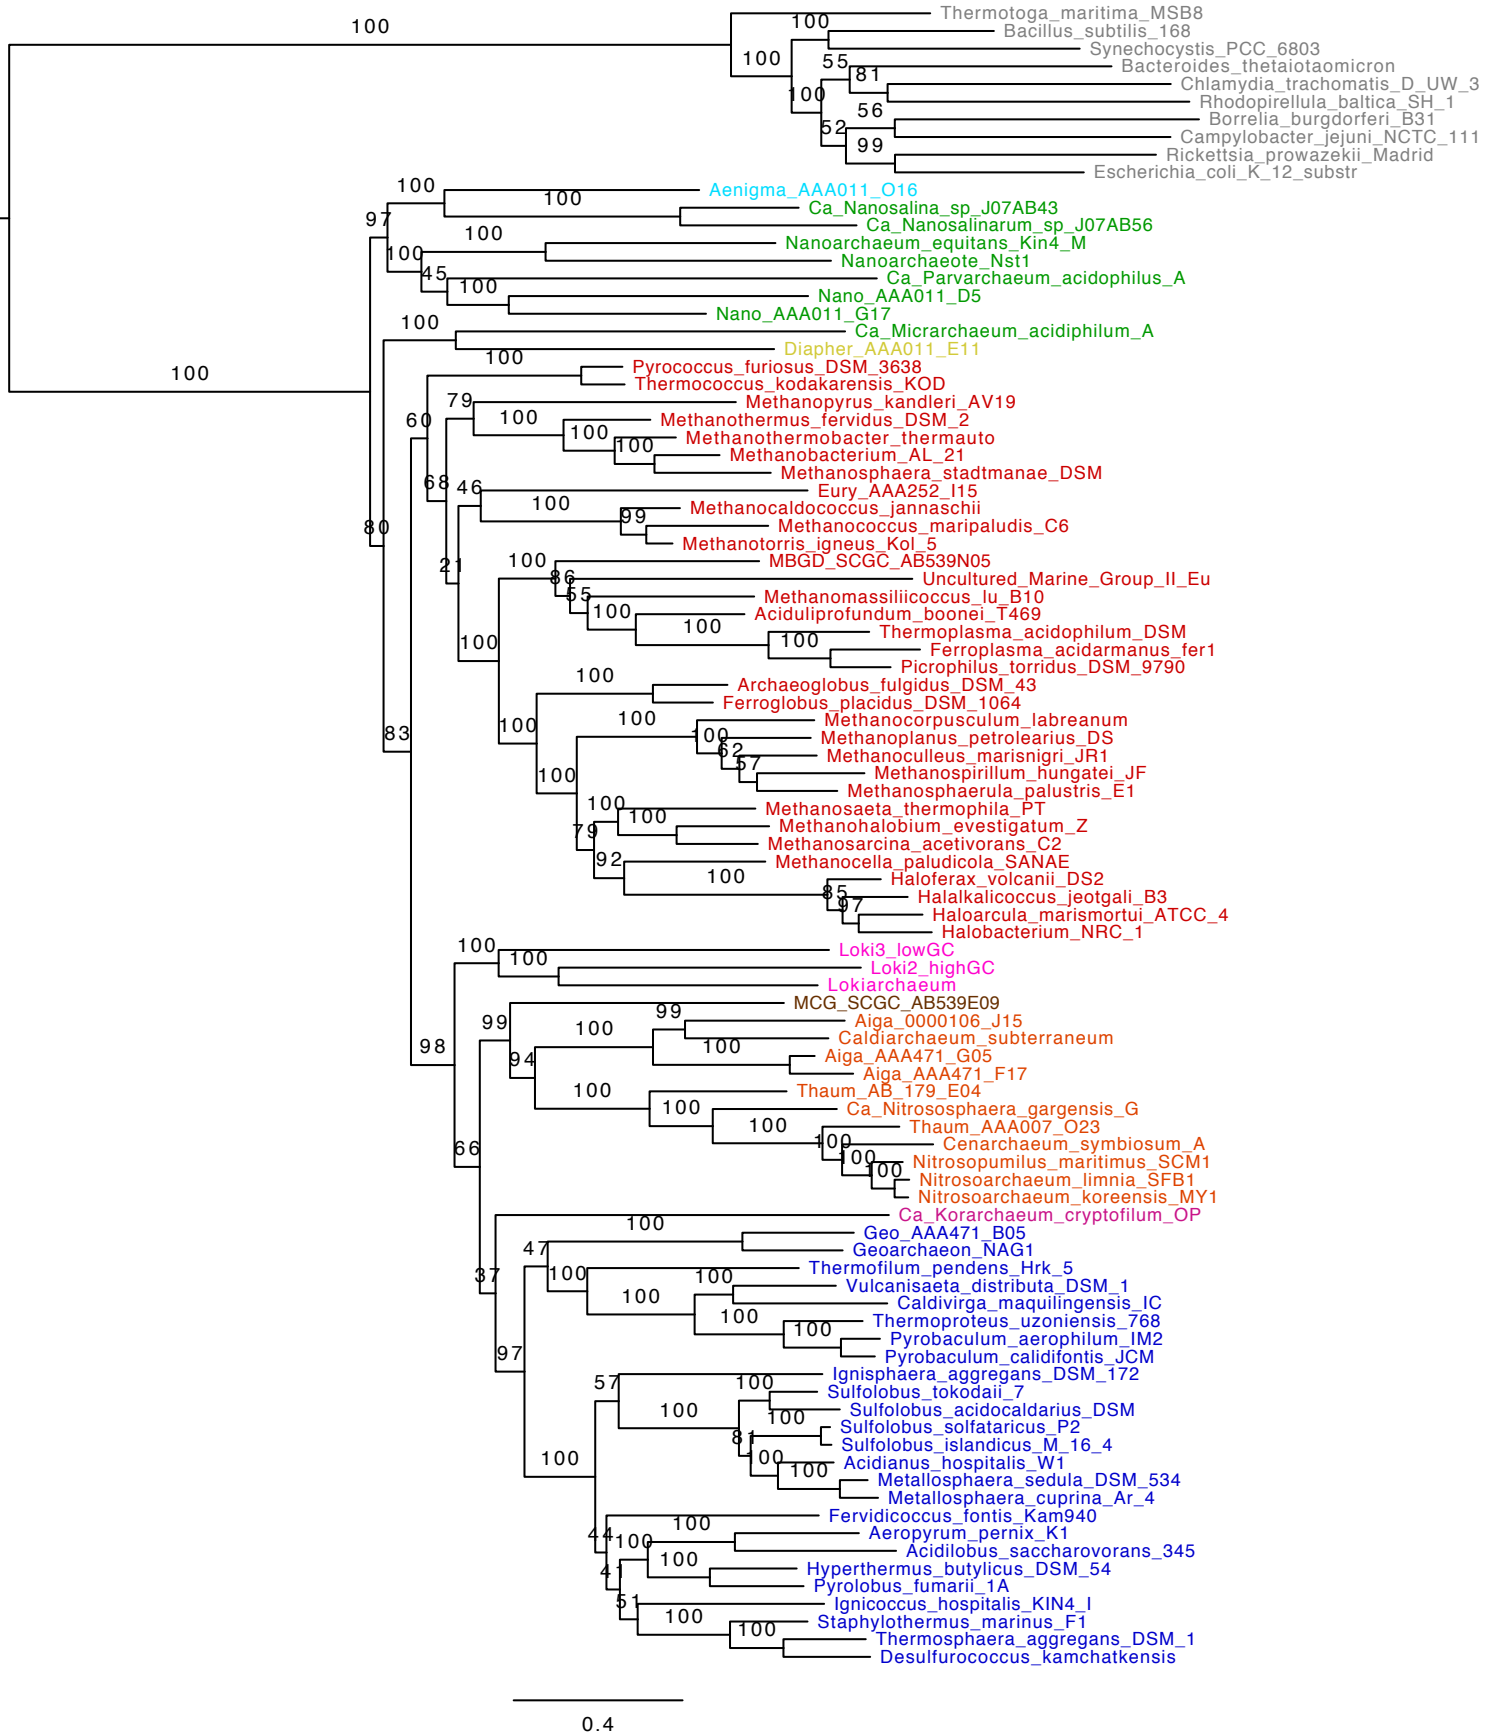

Supp. Fig. S13e: 36 conserved arCOGs, without Eukaryotes / RAxML / PROTGAMMALG

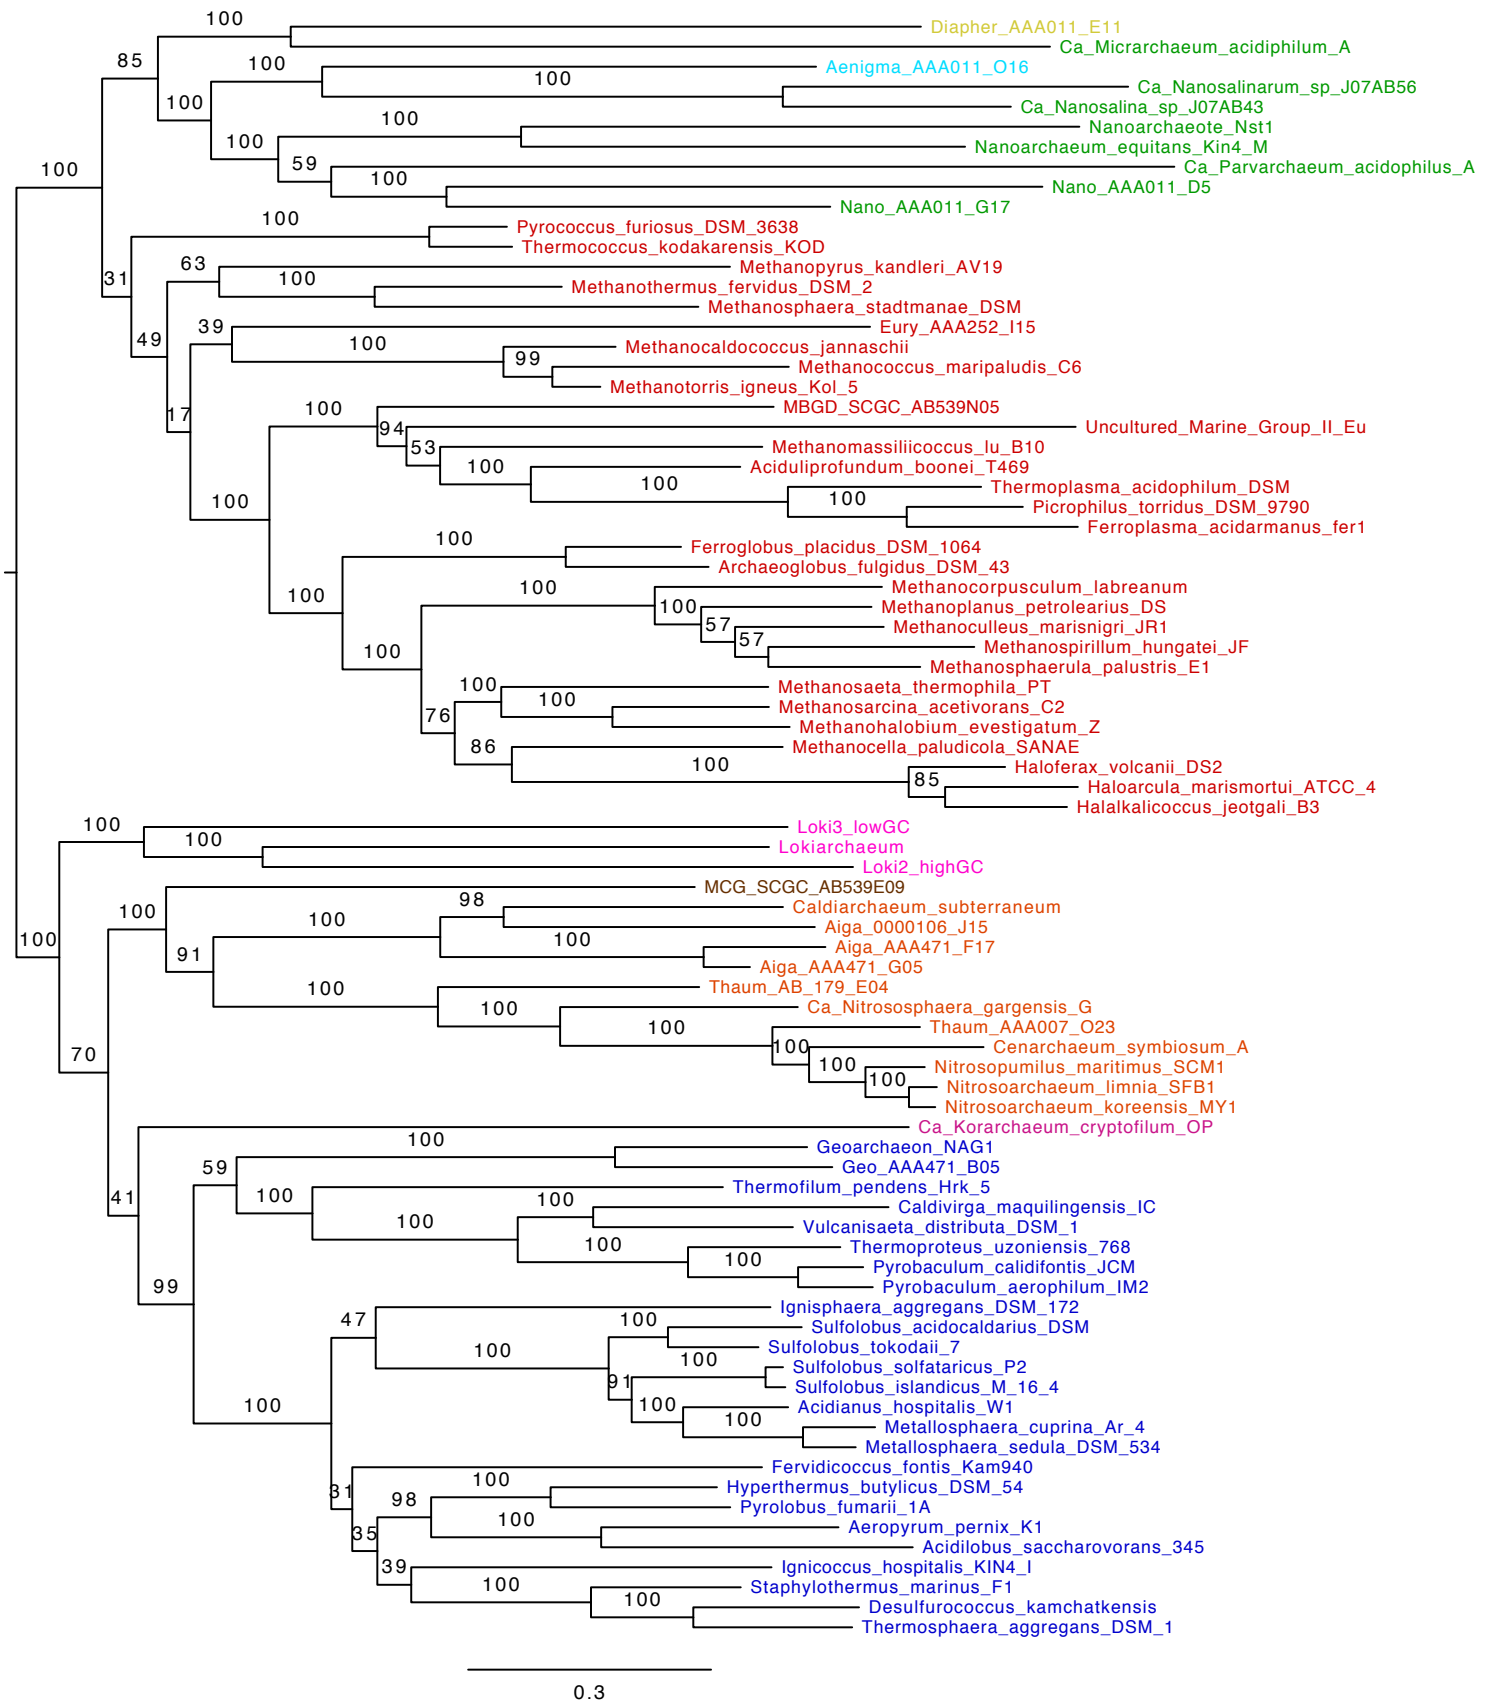

Supp. Fig. S13f: 36 conserved arCOGs, without Bacteria/Eukayotes / RAxML / PROTGAMMALG

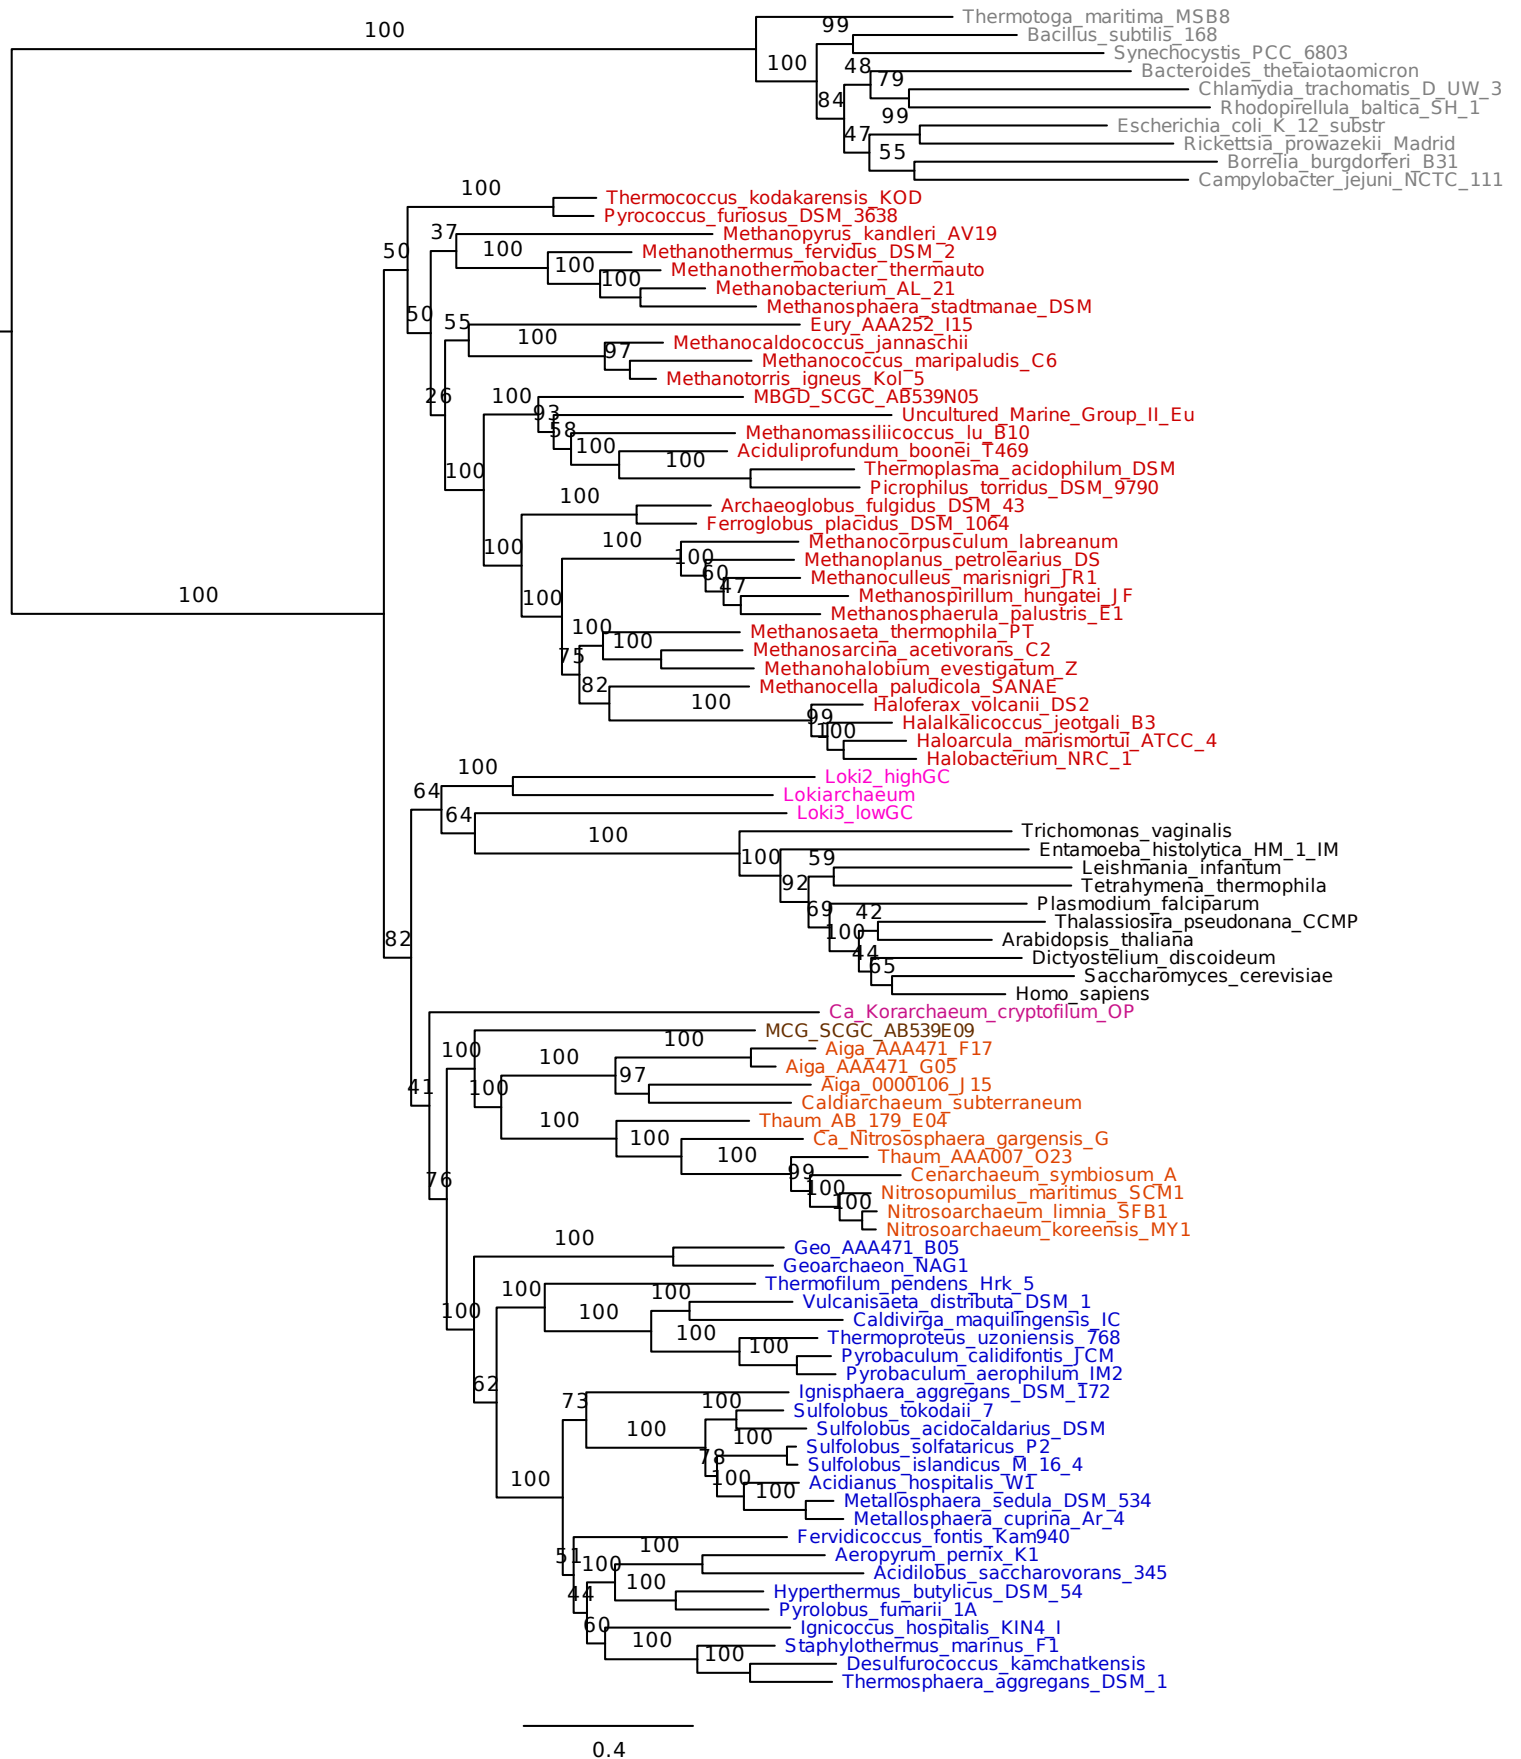

Supp. Fig. S13g: 36 conserved arCOGs, without DPANN / RAxML / PROT GAMMALG

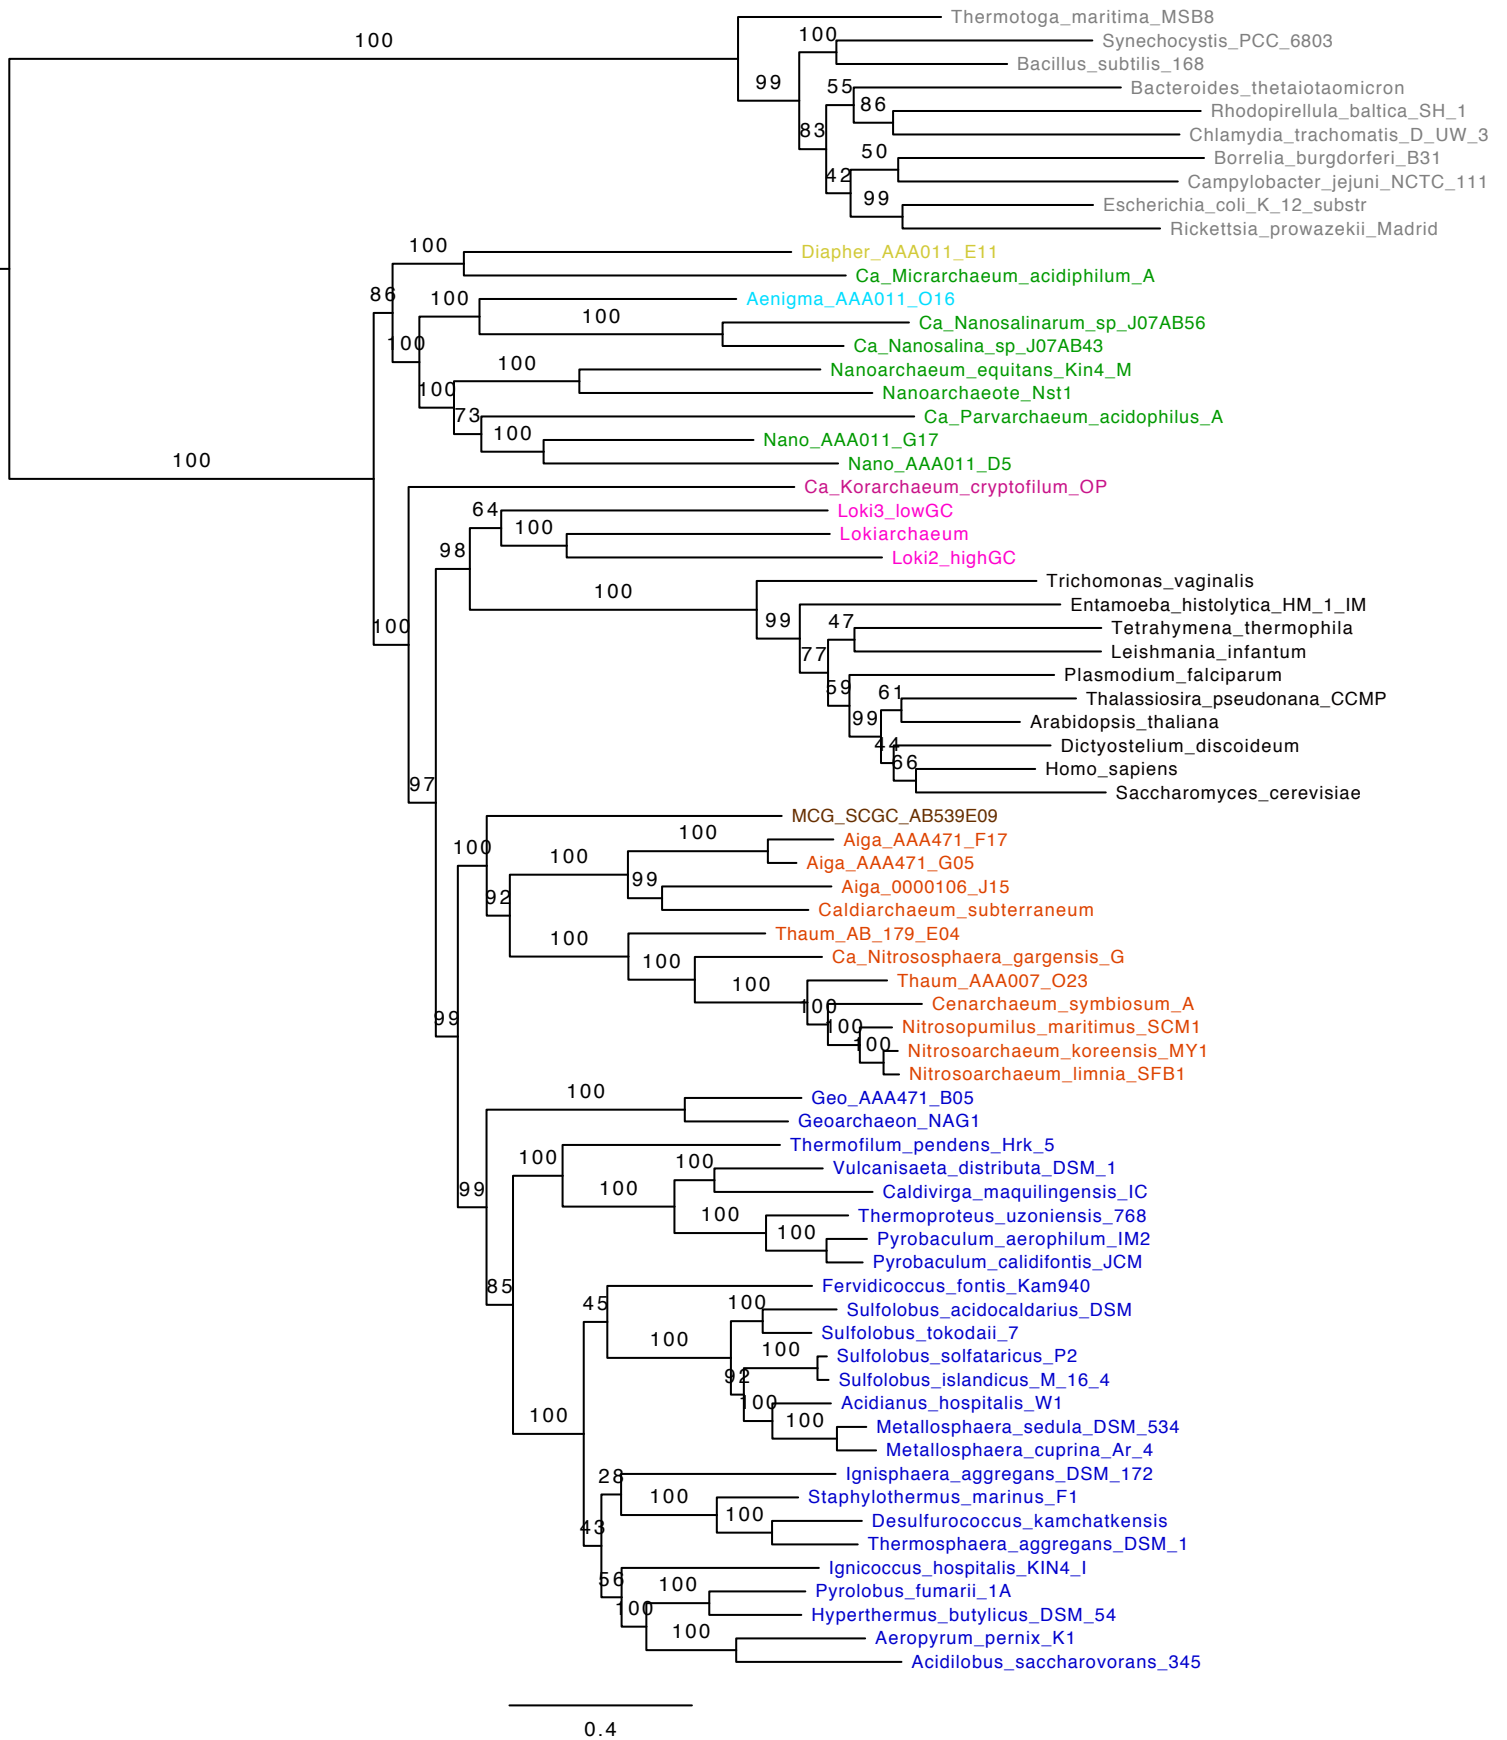

Supp. Fig. S13h: 36 conserved arCOGs, without Euryarchaeota / RAxML / PROTGAMMALG

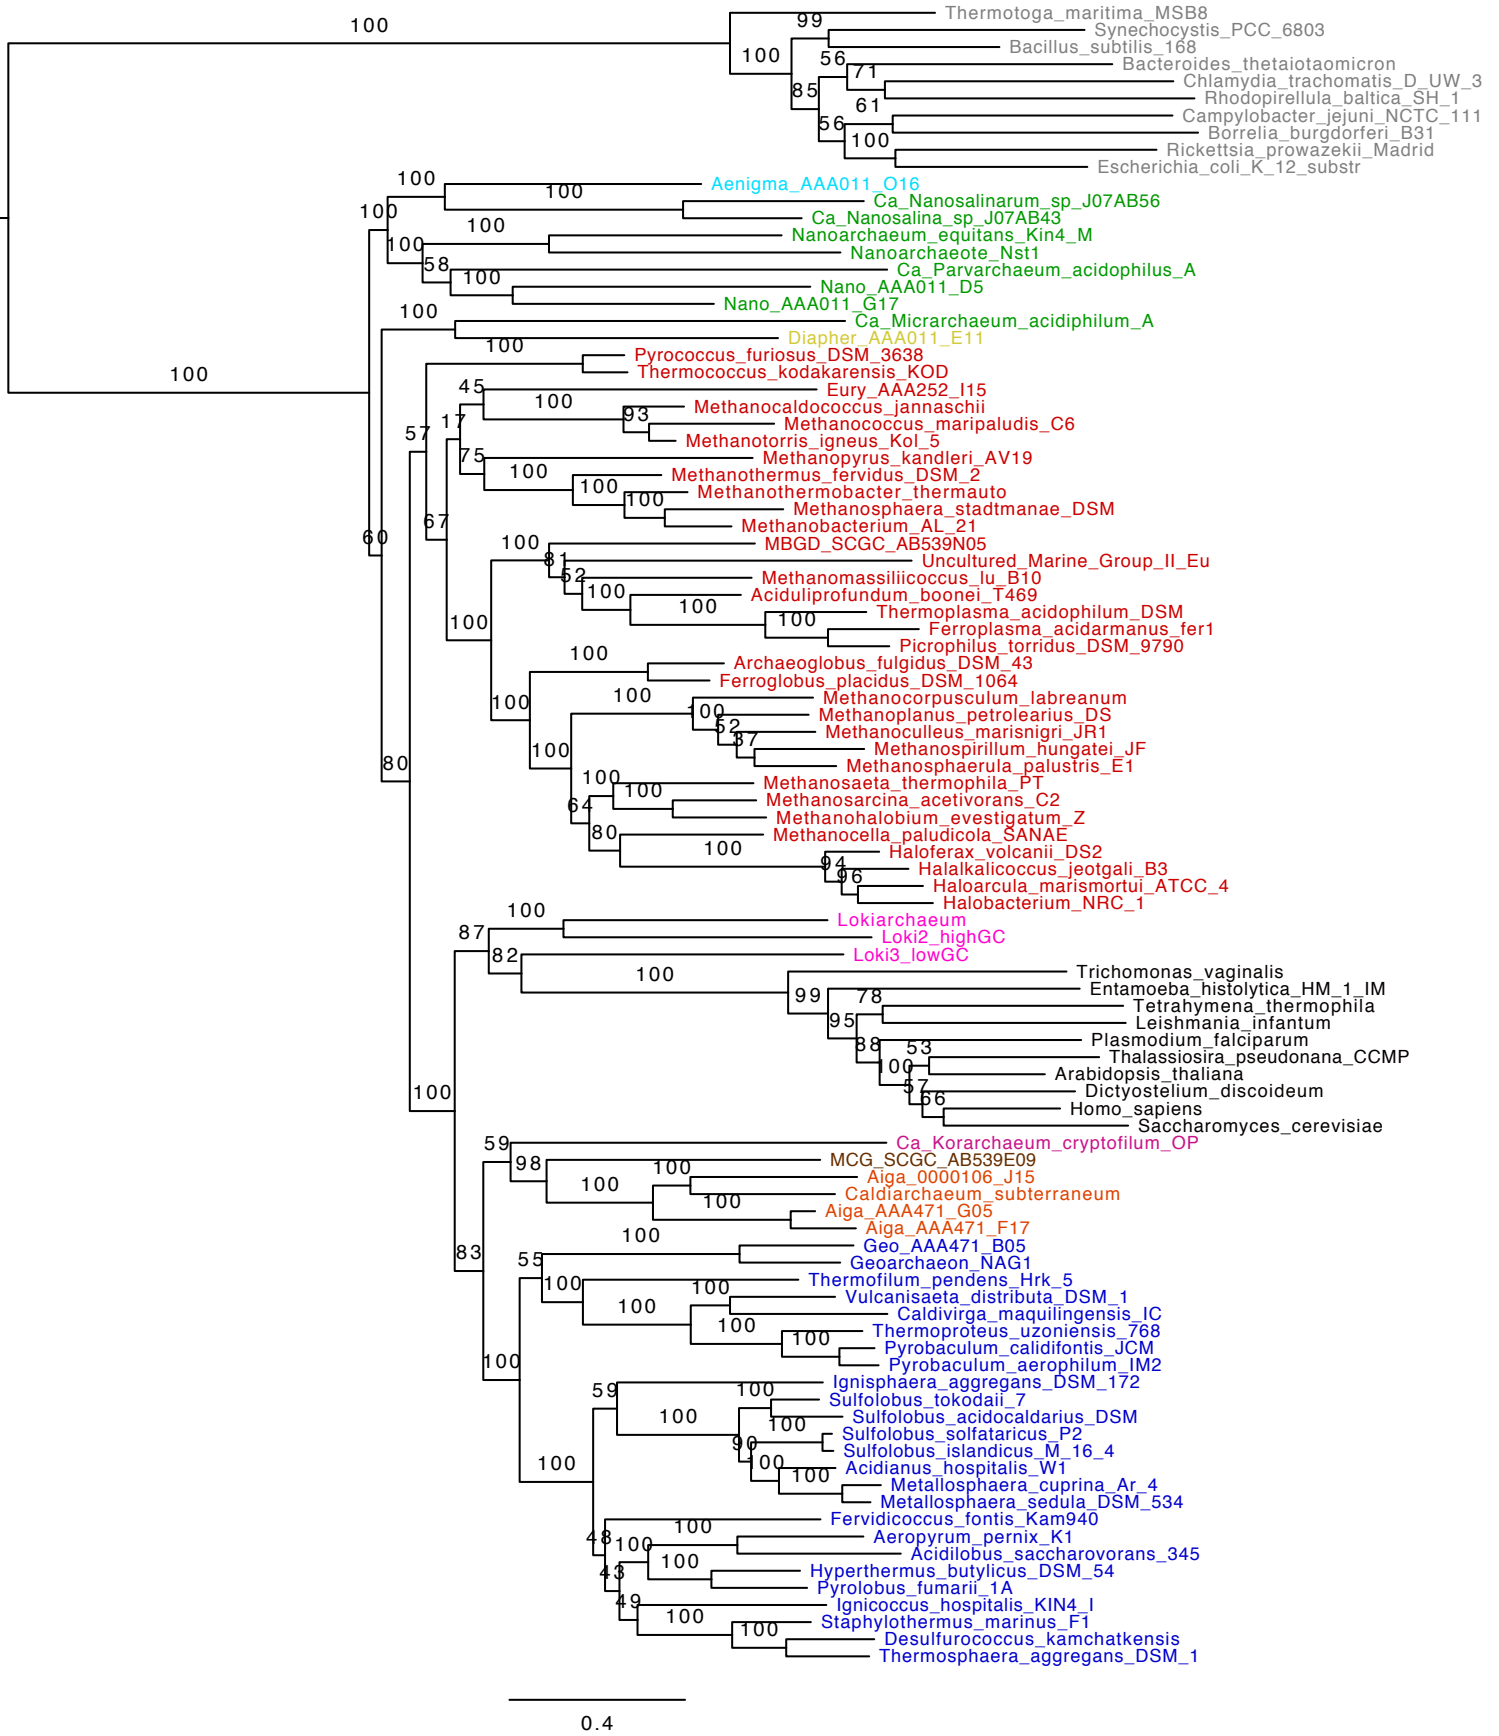

Supp. Fig. S13i: 36 conserved arCOGs, without Thaumarchaeota / RAxML / PROTGAMMALG

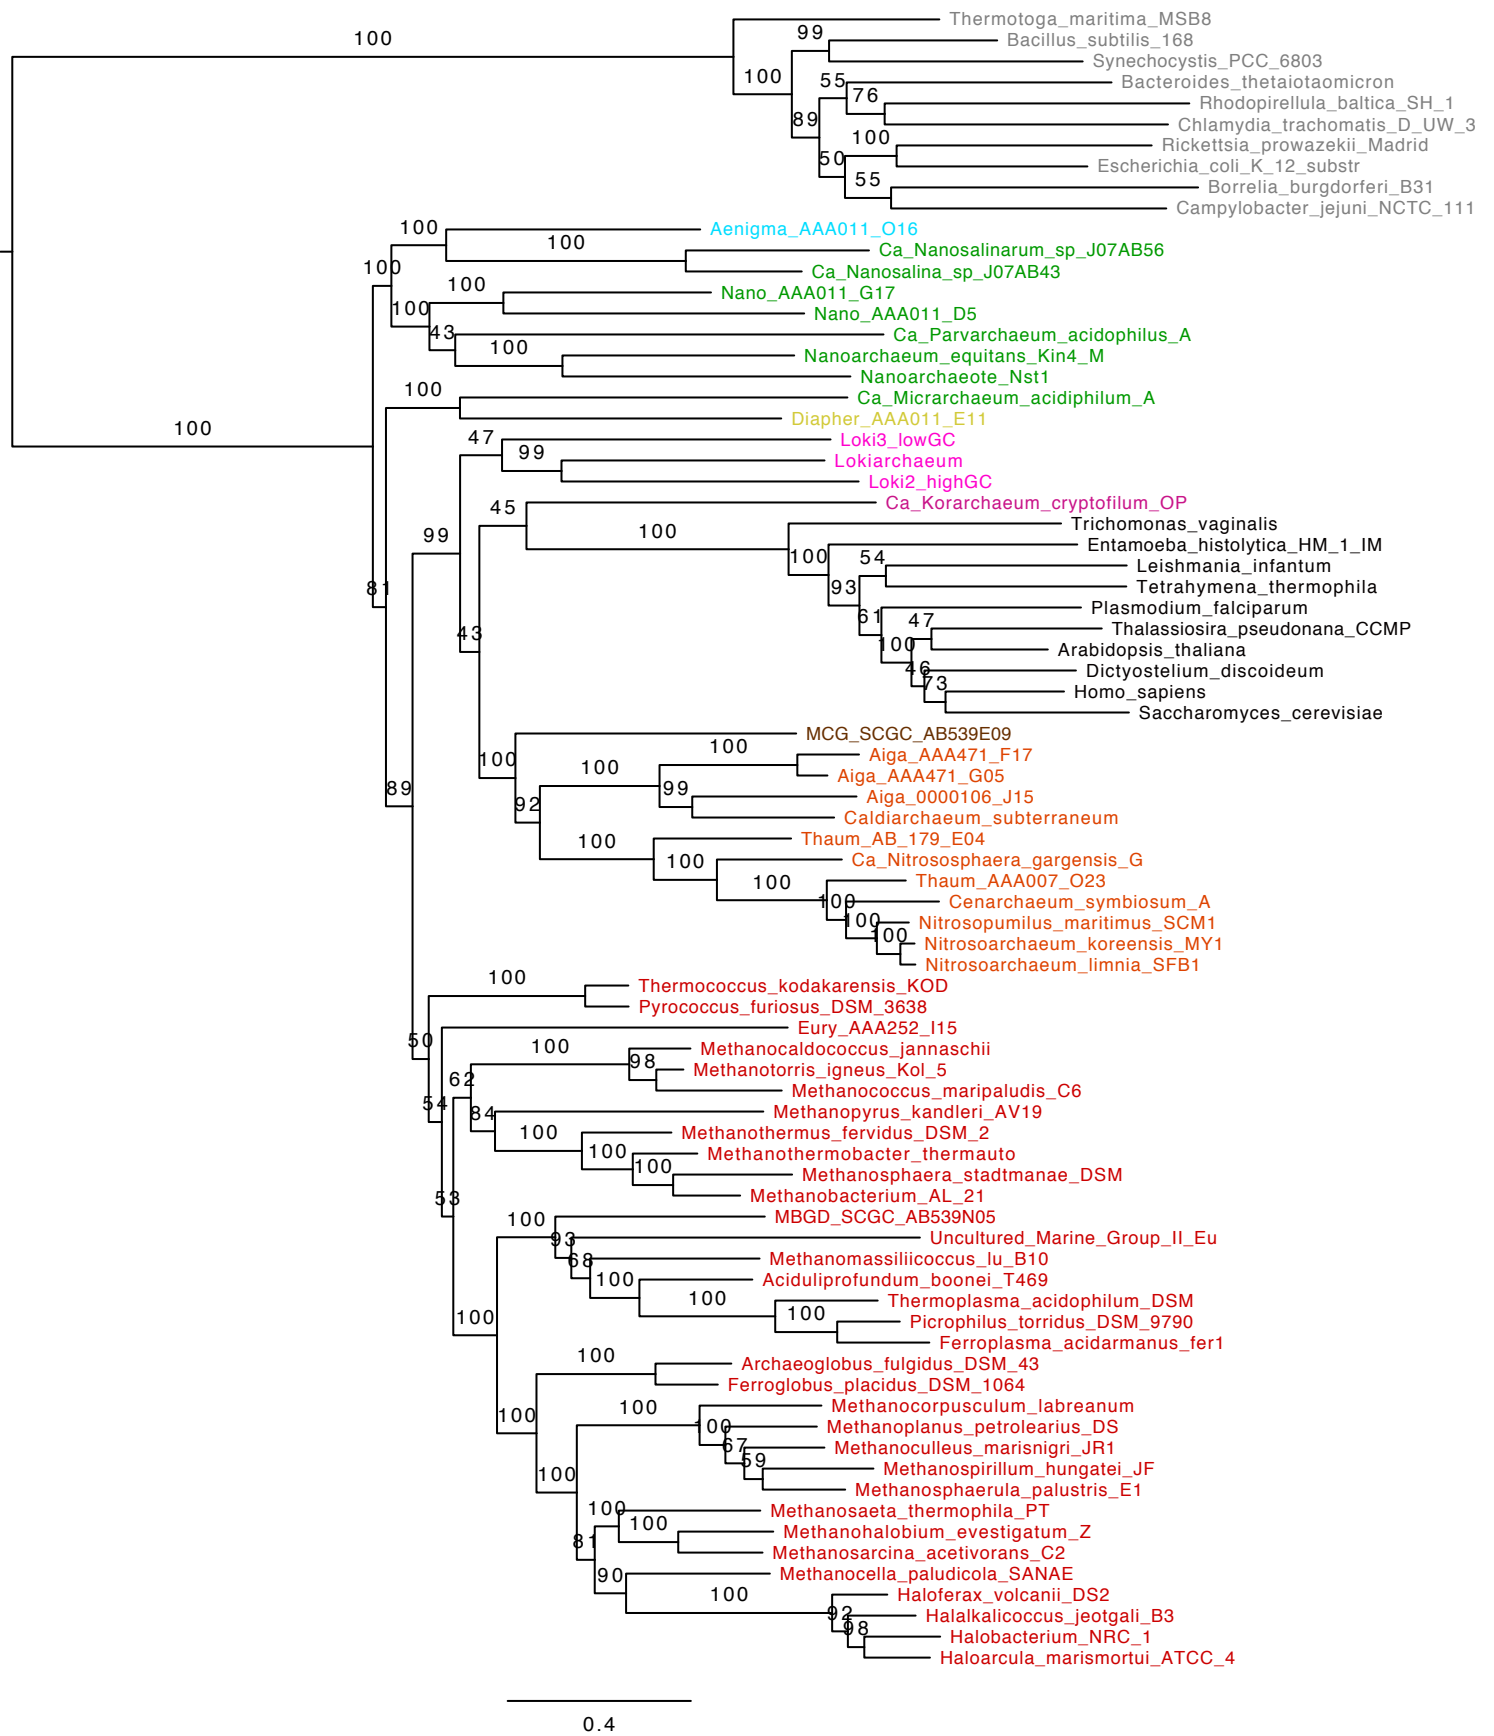

Supp. Fig. S13j: 36 conserved arCOGs, without Crenarchaeota / RAxML / PROTGAMMALG



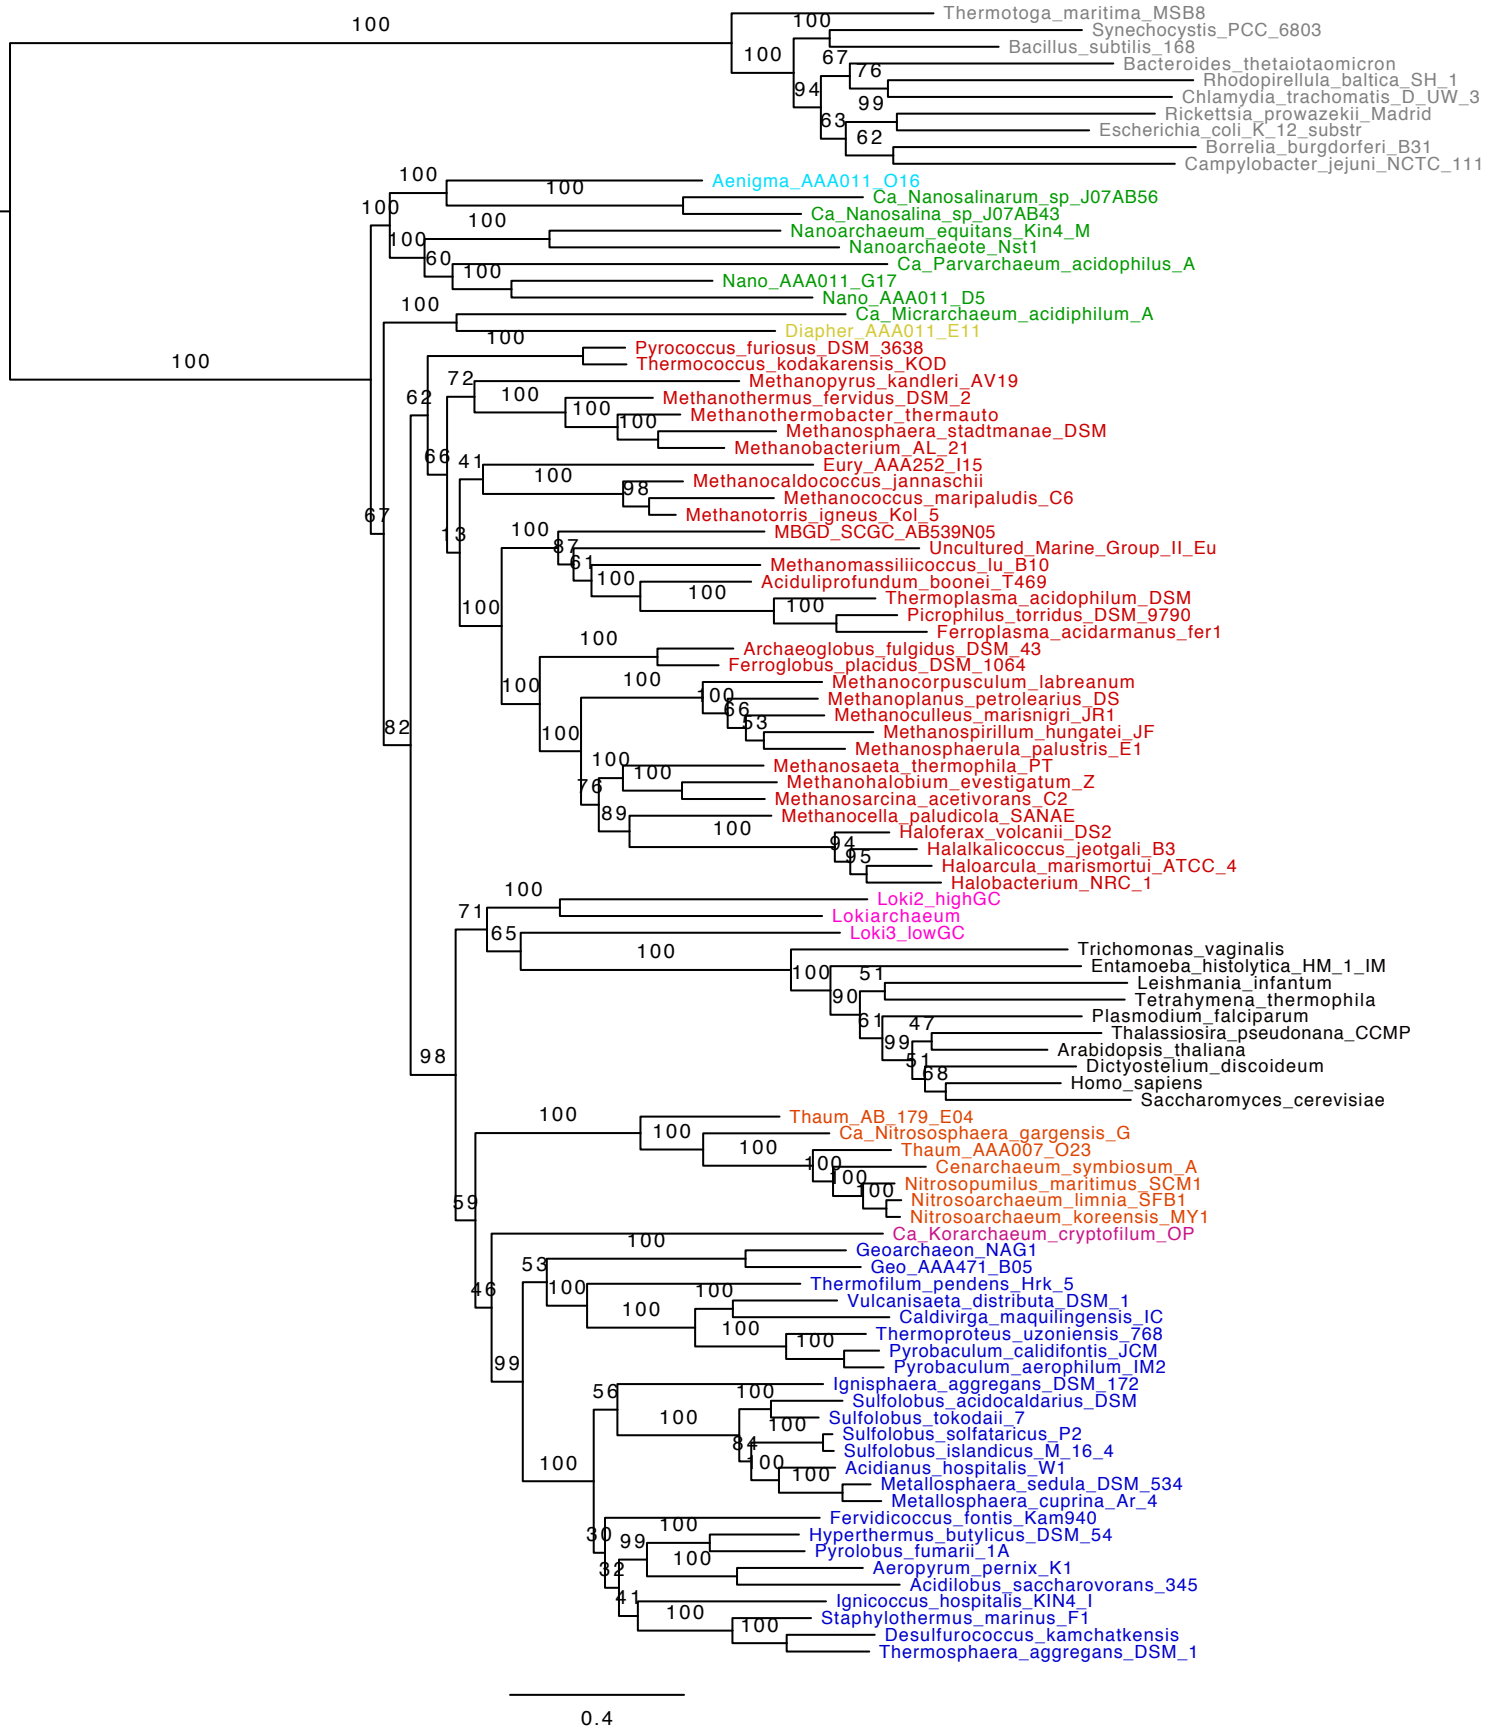

Supp. Fig. S13k: 36 conserved arCOGs, without Aigarchaeota / RAxML / PROTGAMEALG

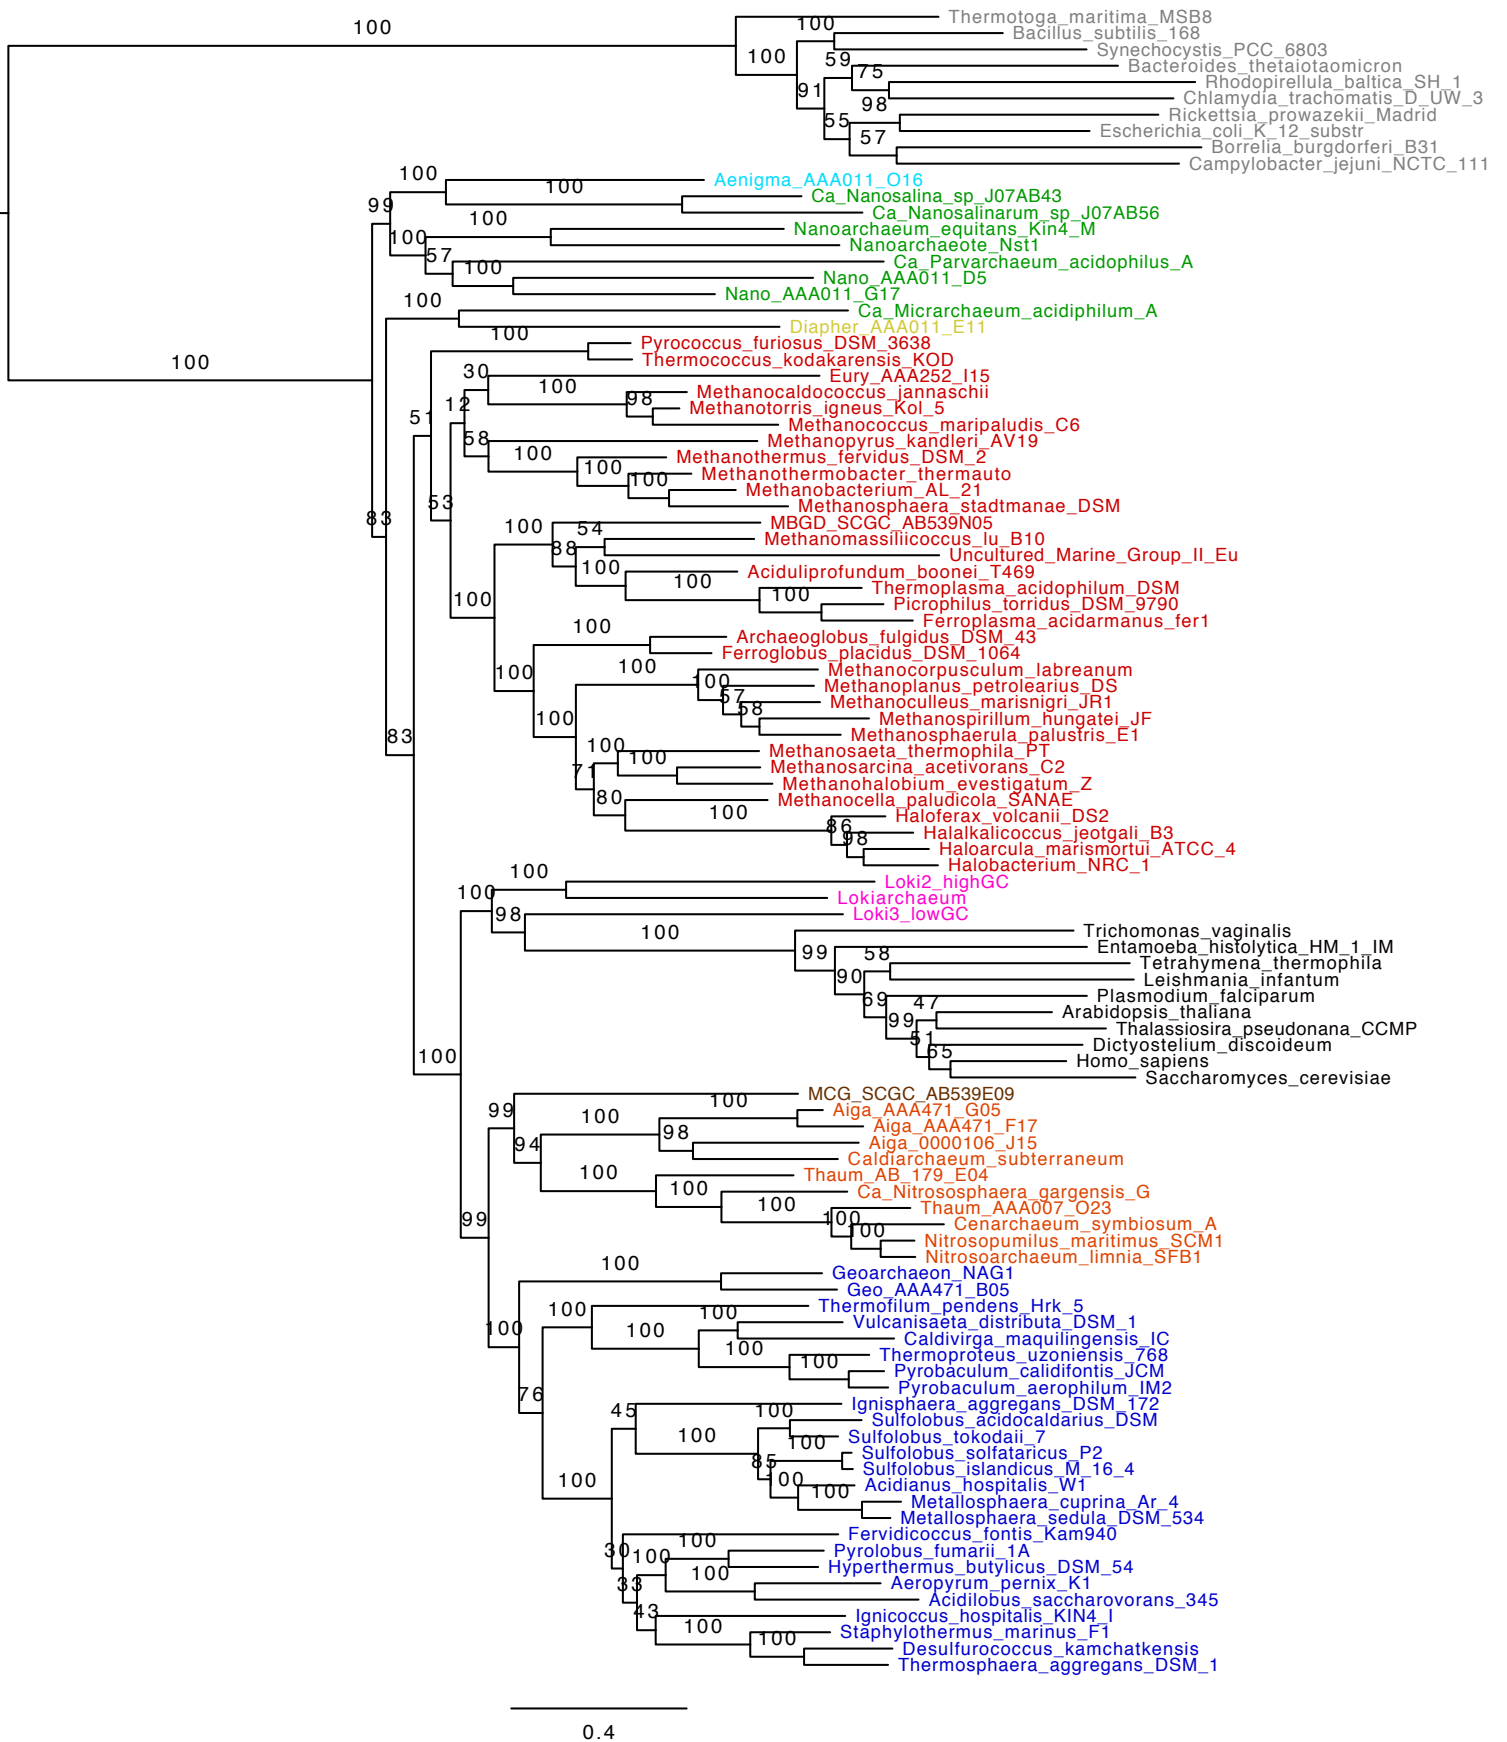

Supp. Fig. S131: 36 conserved arCOGs, without Korarchaeota / RAxML / PROTGAMMALG

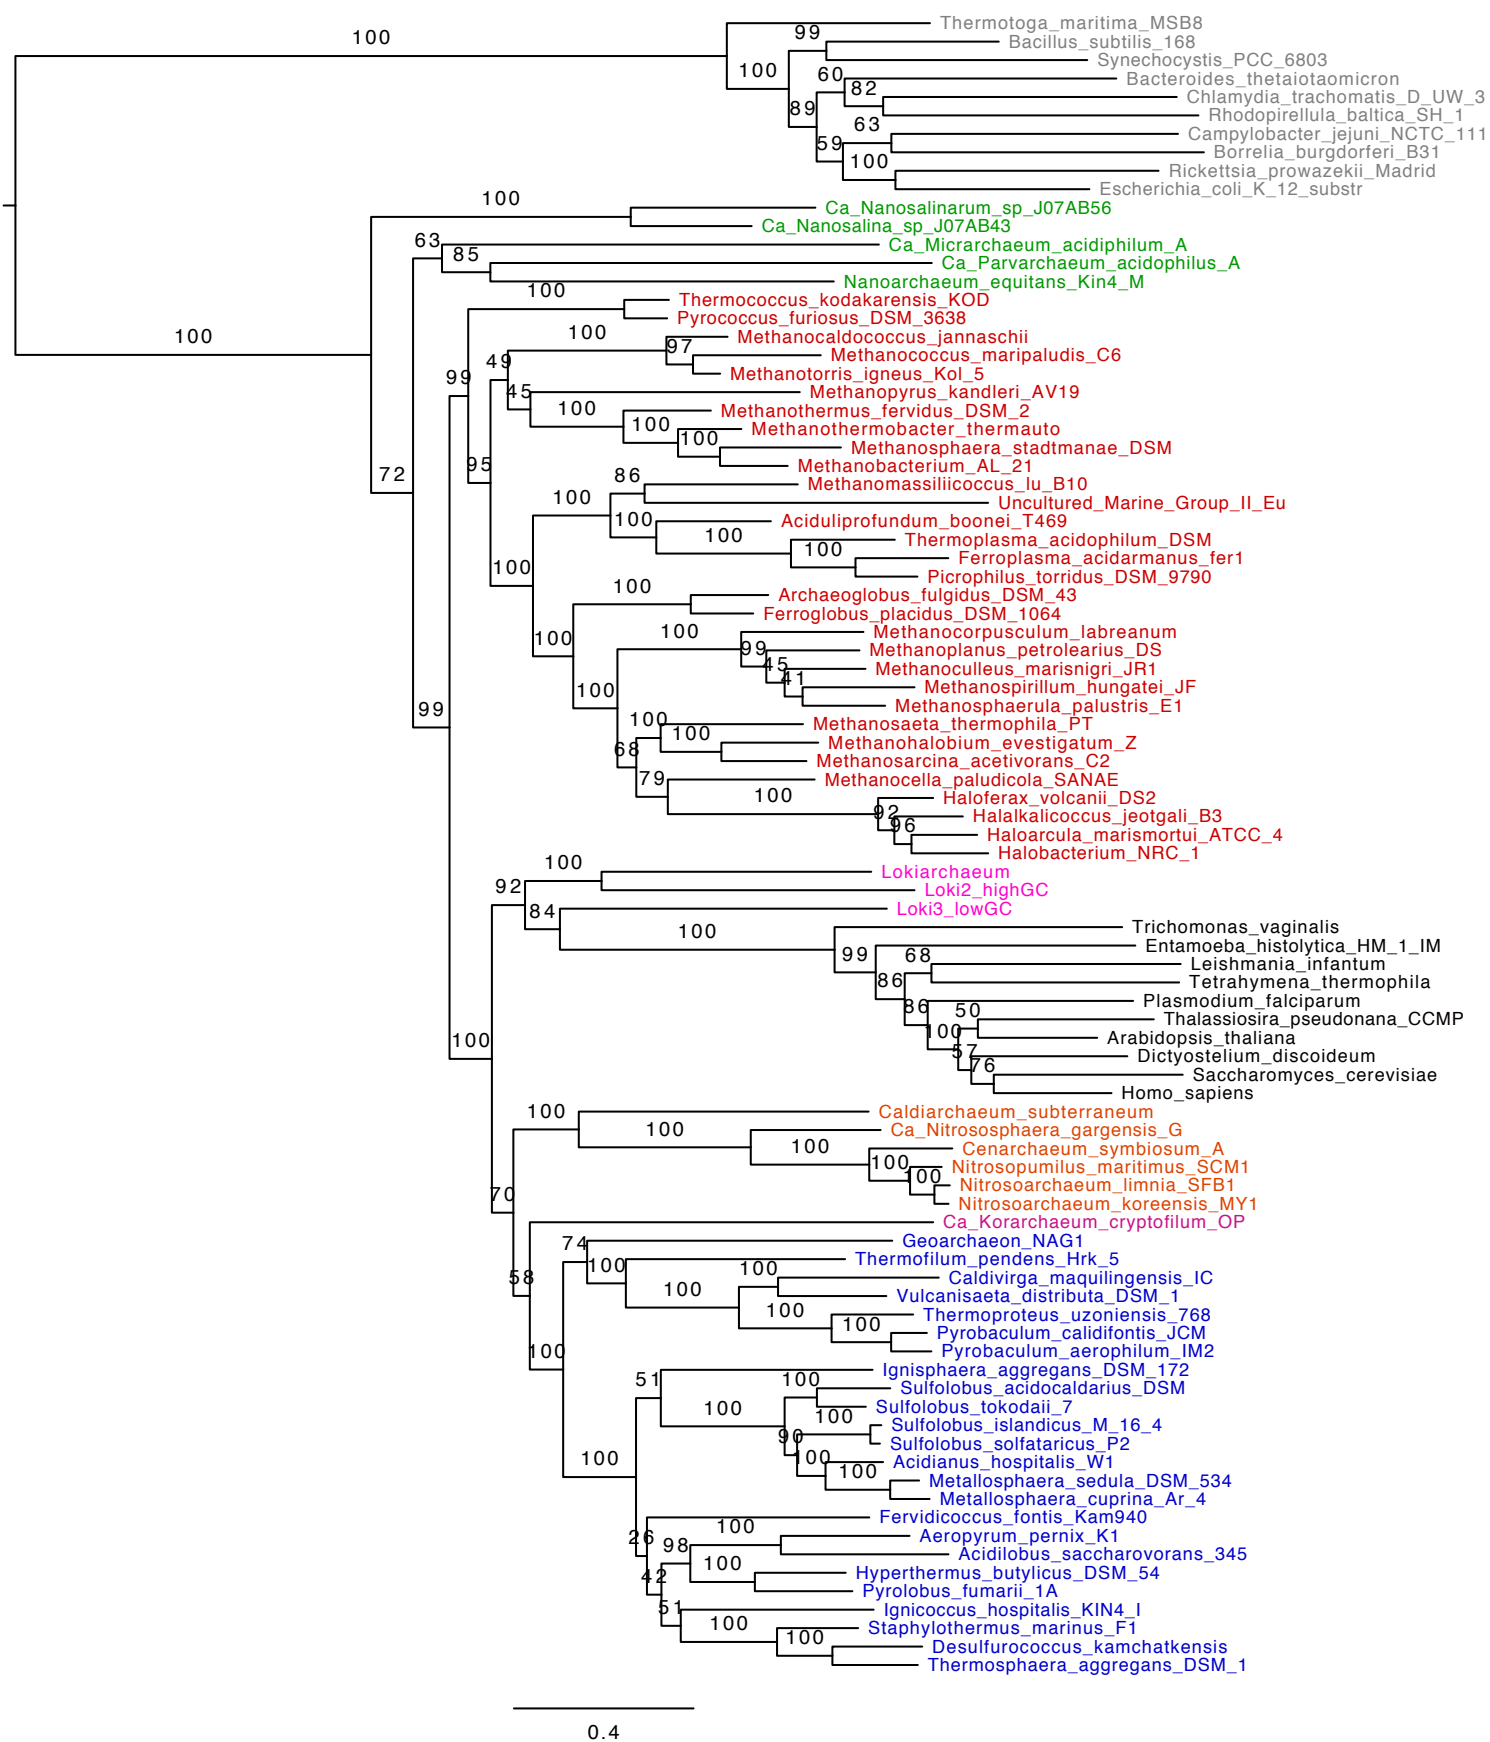

Supp. Fig. S13m: 36 conserved arCOGs, without SAGs / RAxML / PROTGAMMALG

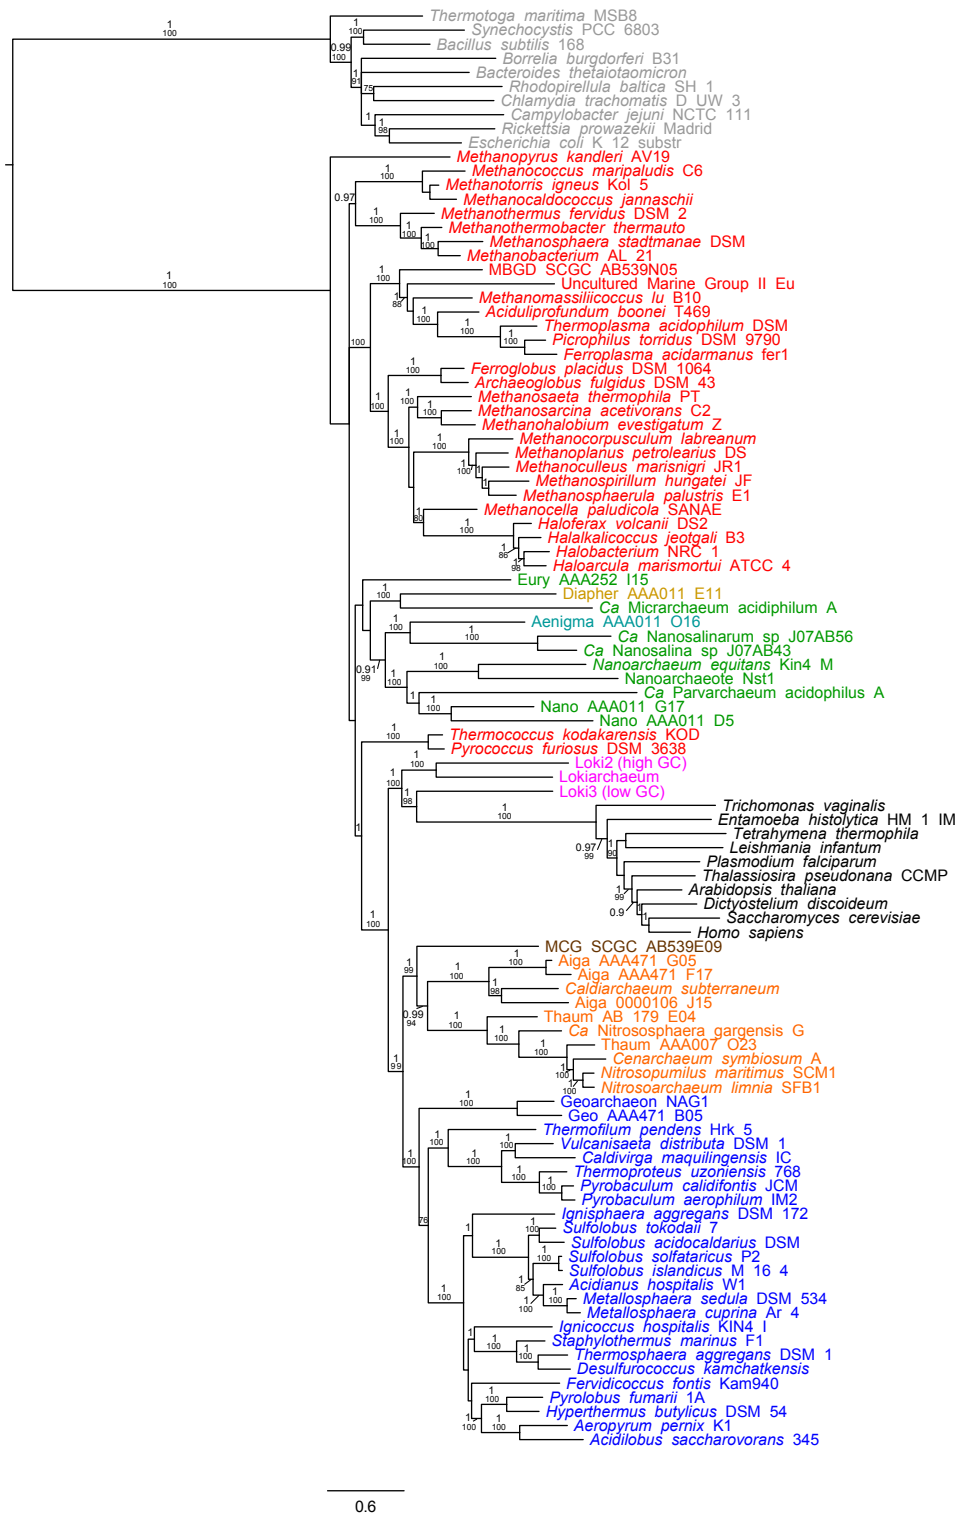

Suppl. Figure S14: Bayesian and Maximum likelihood analysis based on a concatenation of the alignment of 36 highly conserved bacterial and archaeal proteins excluding Korarchaeota. Sequences were aligned with Mafft L-INS-i v. 7.130b and positions with >50% gaps were removed. The phylogeny was inferred with PhyloBayes MPI 1.5a25 using the CAT model and a GTR substitution matrix. Numbers above branches represent posterior probabilities (PP) of Bayesian phylogeny (>0.8) and maximum likelihood (ML) bootstrap support (BS) (> 70). Scale represents the number of substitutions per site based on ML tree. Higher taxonomic groups are color-coded: grey, Bacteria; black, eukaryotes; blue, Crenarchaeota; red, Euryarchaeota; orange, Aig- and Thaumarchaeota; green, Nano- and Nanohaloarchaeota; yellow, Diapherotrites; teal, Aenigmarchaeota; brown, Miscellaneous Crenarchaeal Group (MCG); pink, Lokiarchaeota.

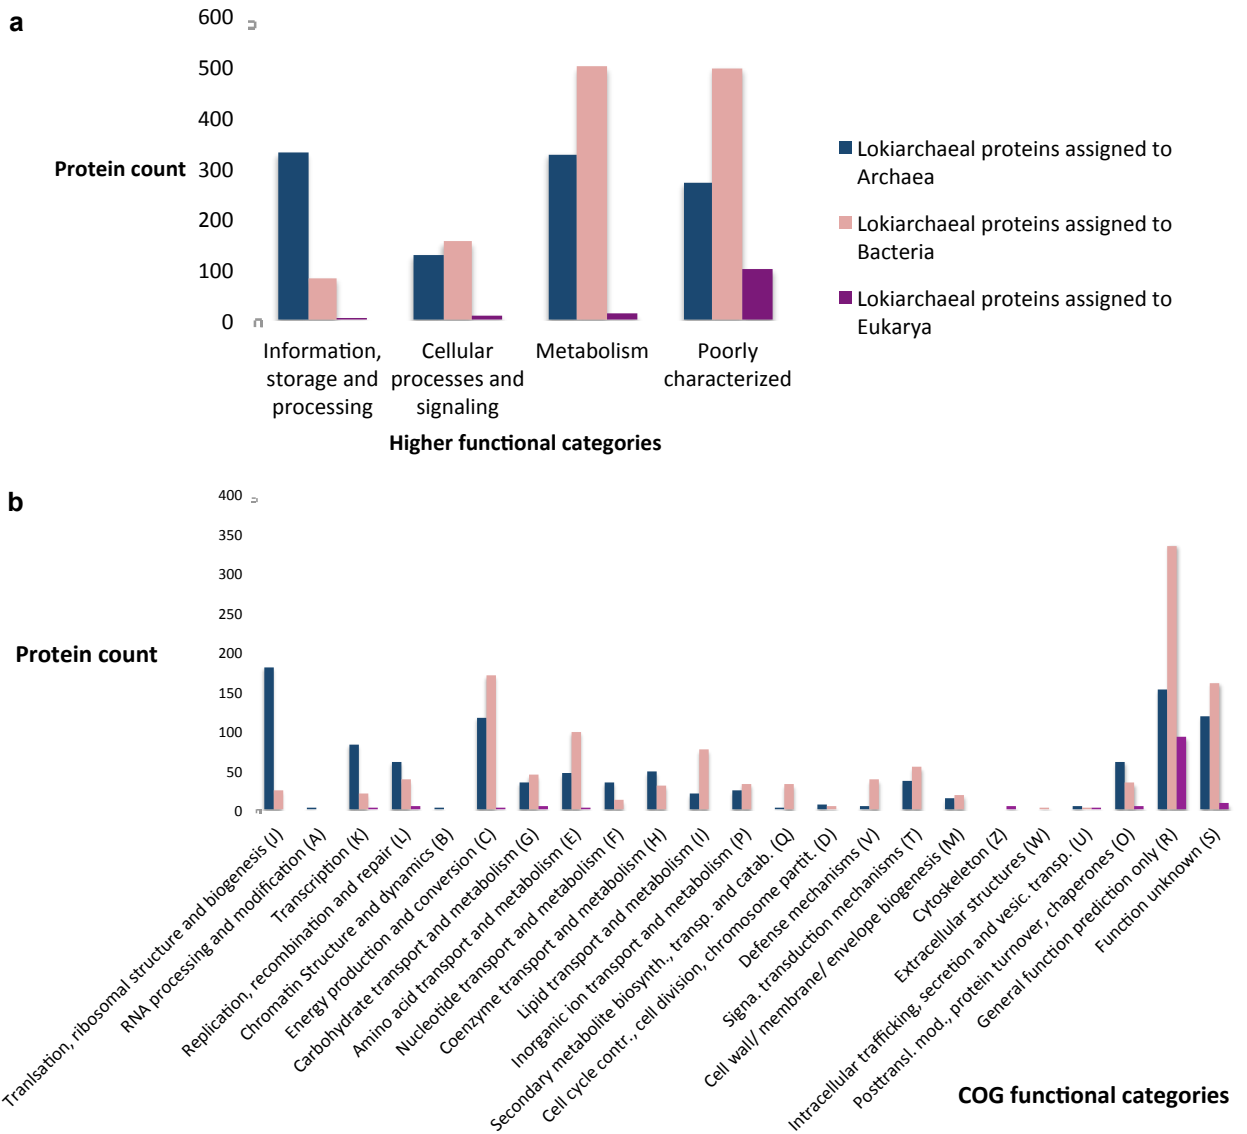

**Suppl. Figure S15: Overview of functional classification (COG category) of lokiarchaeal proteins assigned to major taxonomic categories. a)** Protein counts based on higher functional categories. **b)** Protein counts based on all COG functional categories. Taxonomic categories are color-coded, e.g. Archaea are shown in dark blue; Bacteria in pink and Eukarya in purple.

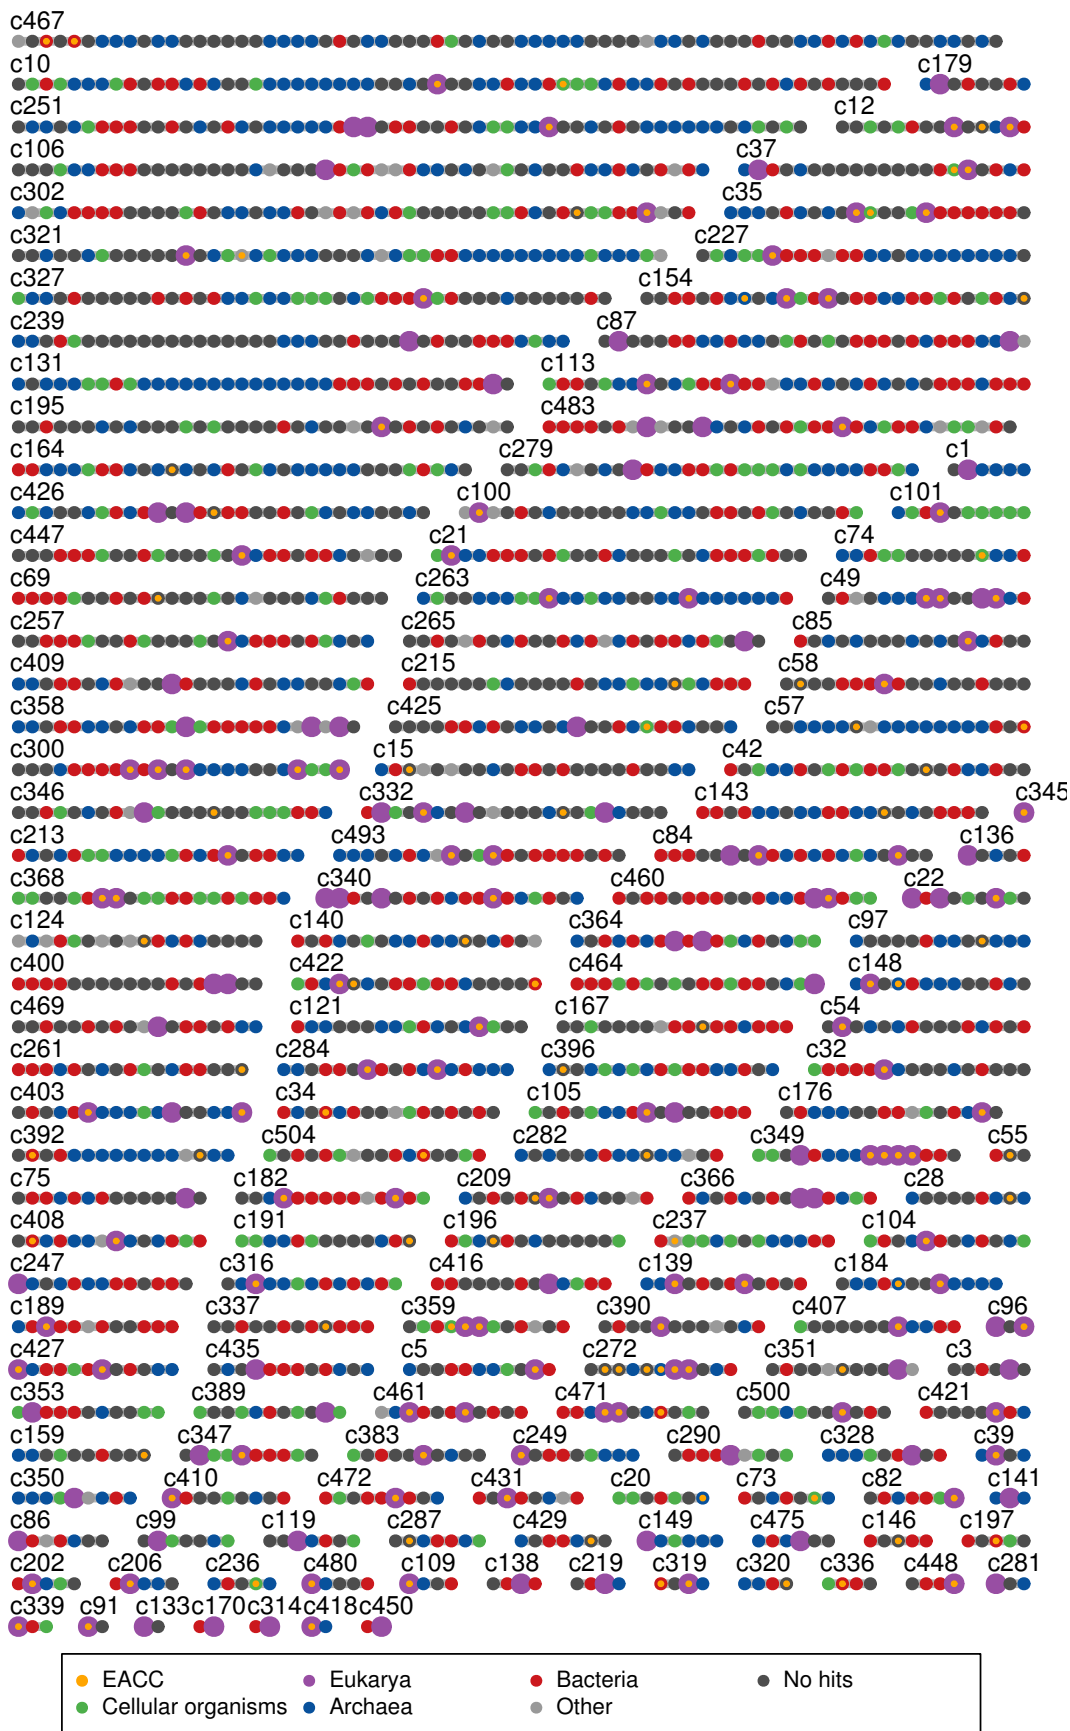

**Suppl. Figure S16: Location and genomic context of ESPs, other proteins affiliated to eukaryotes as well as additional proteins potentially involved in extended archaeal cellular complexity (EACC) in the Lokiarchaeum composite genome.** Each contig containing at least one protein of these two sets is represented, in no particular order. The contig number (shortened for the sake of space) is shown above the contig. Proteins taxonomically affiliated to Eukaryota are shown in purple, with a larger dot. Proteins potentially involved in EACC are shown with small orange circles inside. Colouring according to the taxonomic affiliation obtained from MEGAN (see section 1.12 of the Methods section), simplified at domain level. Green, cellular organisms; blue, Archaea; red, Bacteria; grey, Other; dark grey, No hits.

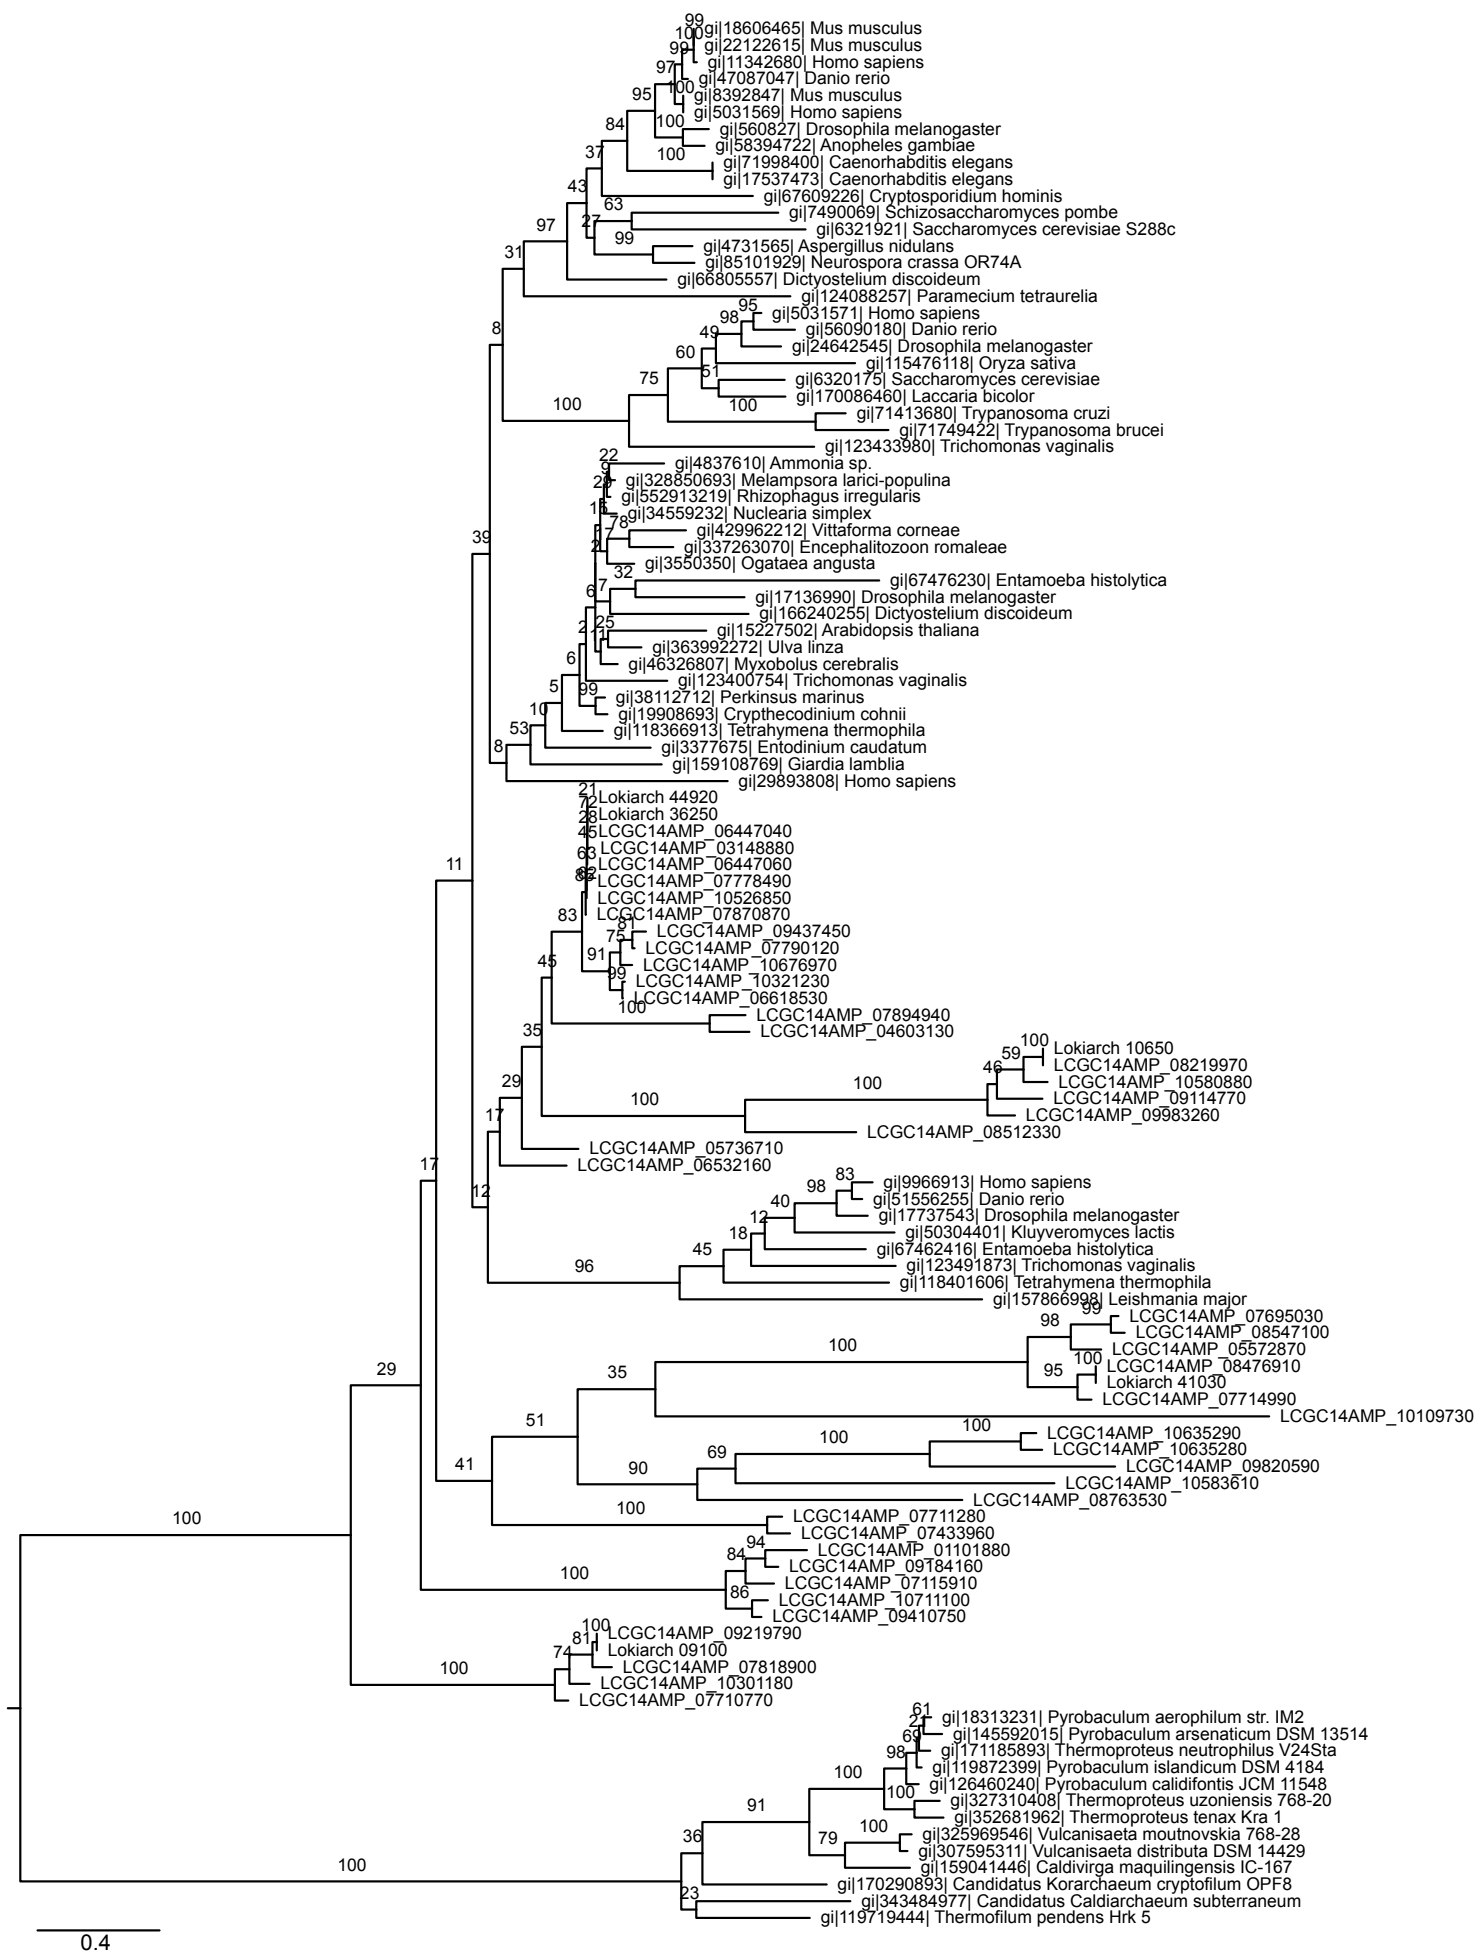

**Suppl. Figure S17:** Un-collapsed maximum likelihood phylogeny based on 378 aligned amino acid positions of eukaryotic, and archaeal actin homologs as well as of homologs identified in Lokiarchaeum and LCGC14AMP (shown in Fig. 3a). Only eukaryotic actins and the actin-related protein families 1-3 were included in this reconstruction. (A maximum likelihood phylogeny including also the more distant eukaryotic Arp families can be provided upon request). Sequences were aligned using MAFFT L-INS-i and 100 slow maximum likelihood bootstraps were calculated and are shown at their respective branches. Crenactin was used as out-group. The scale bar represents number of amino acid substitutions per site.



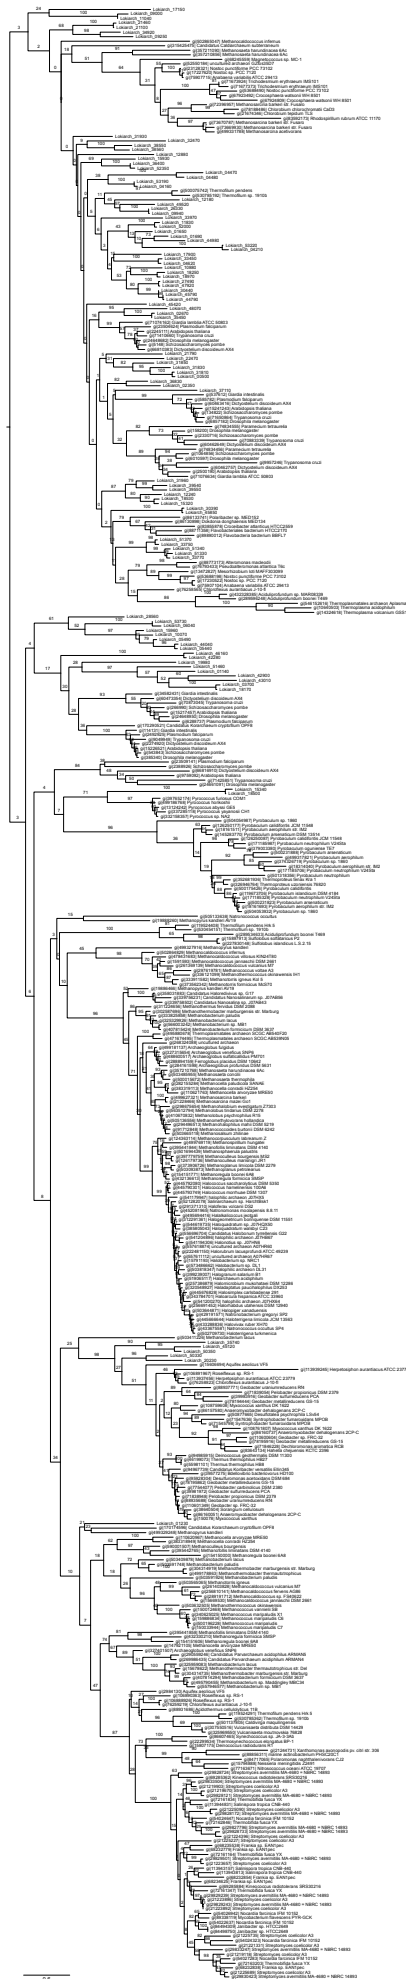

**Suppl. Figure S18:** Un-collapsed maximum likelihood phylogeny based on 150 aligned amino acid positions of small Ras- and Arf-type GTPases (IPR1806 and IPR6689) including all homologs identified in Lokiarchaeum and other archaea, and as well as representative sets of eukaryotic and bacterial sequences (see Methods). Sequences were aligned using MAFFT L-INS-i and 100 slow bootstraps were calculated. Scale bar indicates number of amino acid substitutions per site.

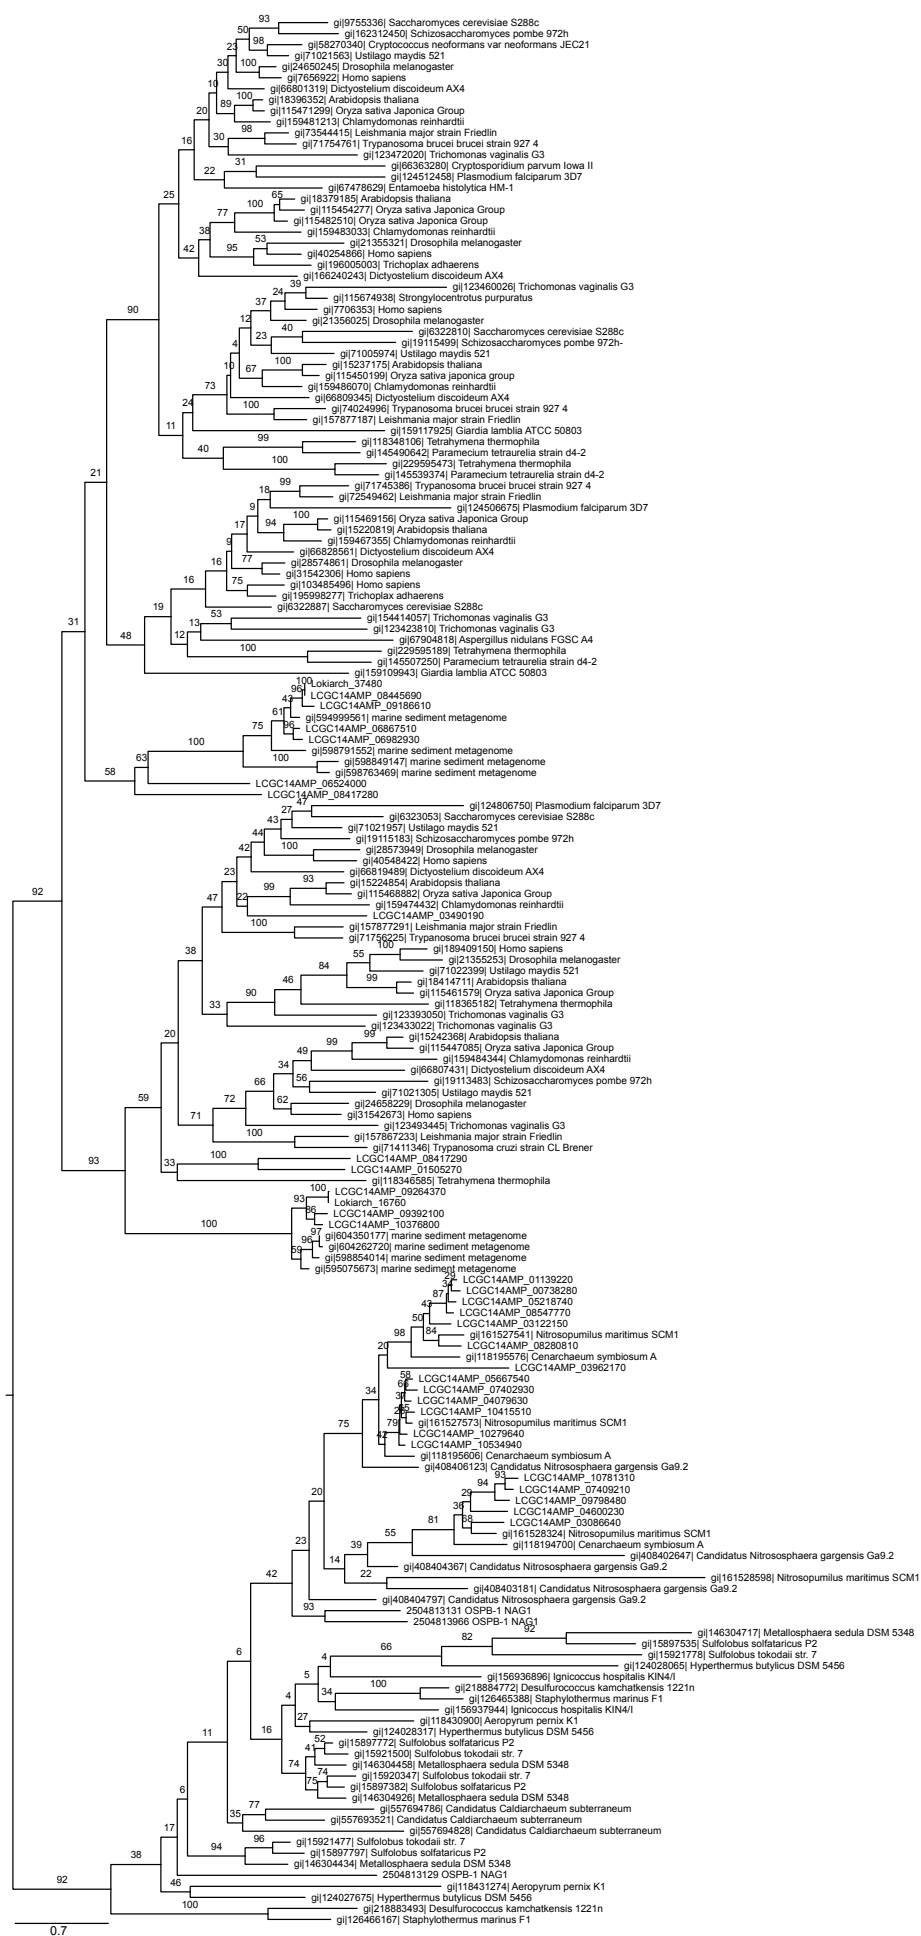

**Suppl. Figure S19:** Un-collapsed maximum likelihood phylogeny based on 207 aligned amino acid positions of archaeal ESCRT-III homologs, eukaryotic Vps2/24/46 and Vps20/32/60 family proteins as well as homologs present in Lokiarchaeum as well as LCGC14AMP (shown in Fig. 4b). Sequences were aligned using MAFFT L-INS-i and 100 slow bootstraps were calculated. Scale bar indicates number of amino acid substitutions per site.

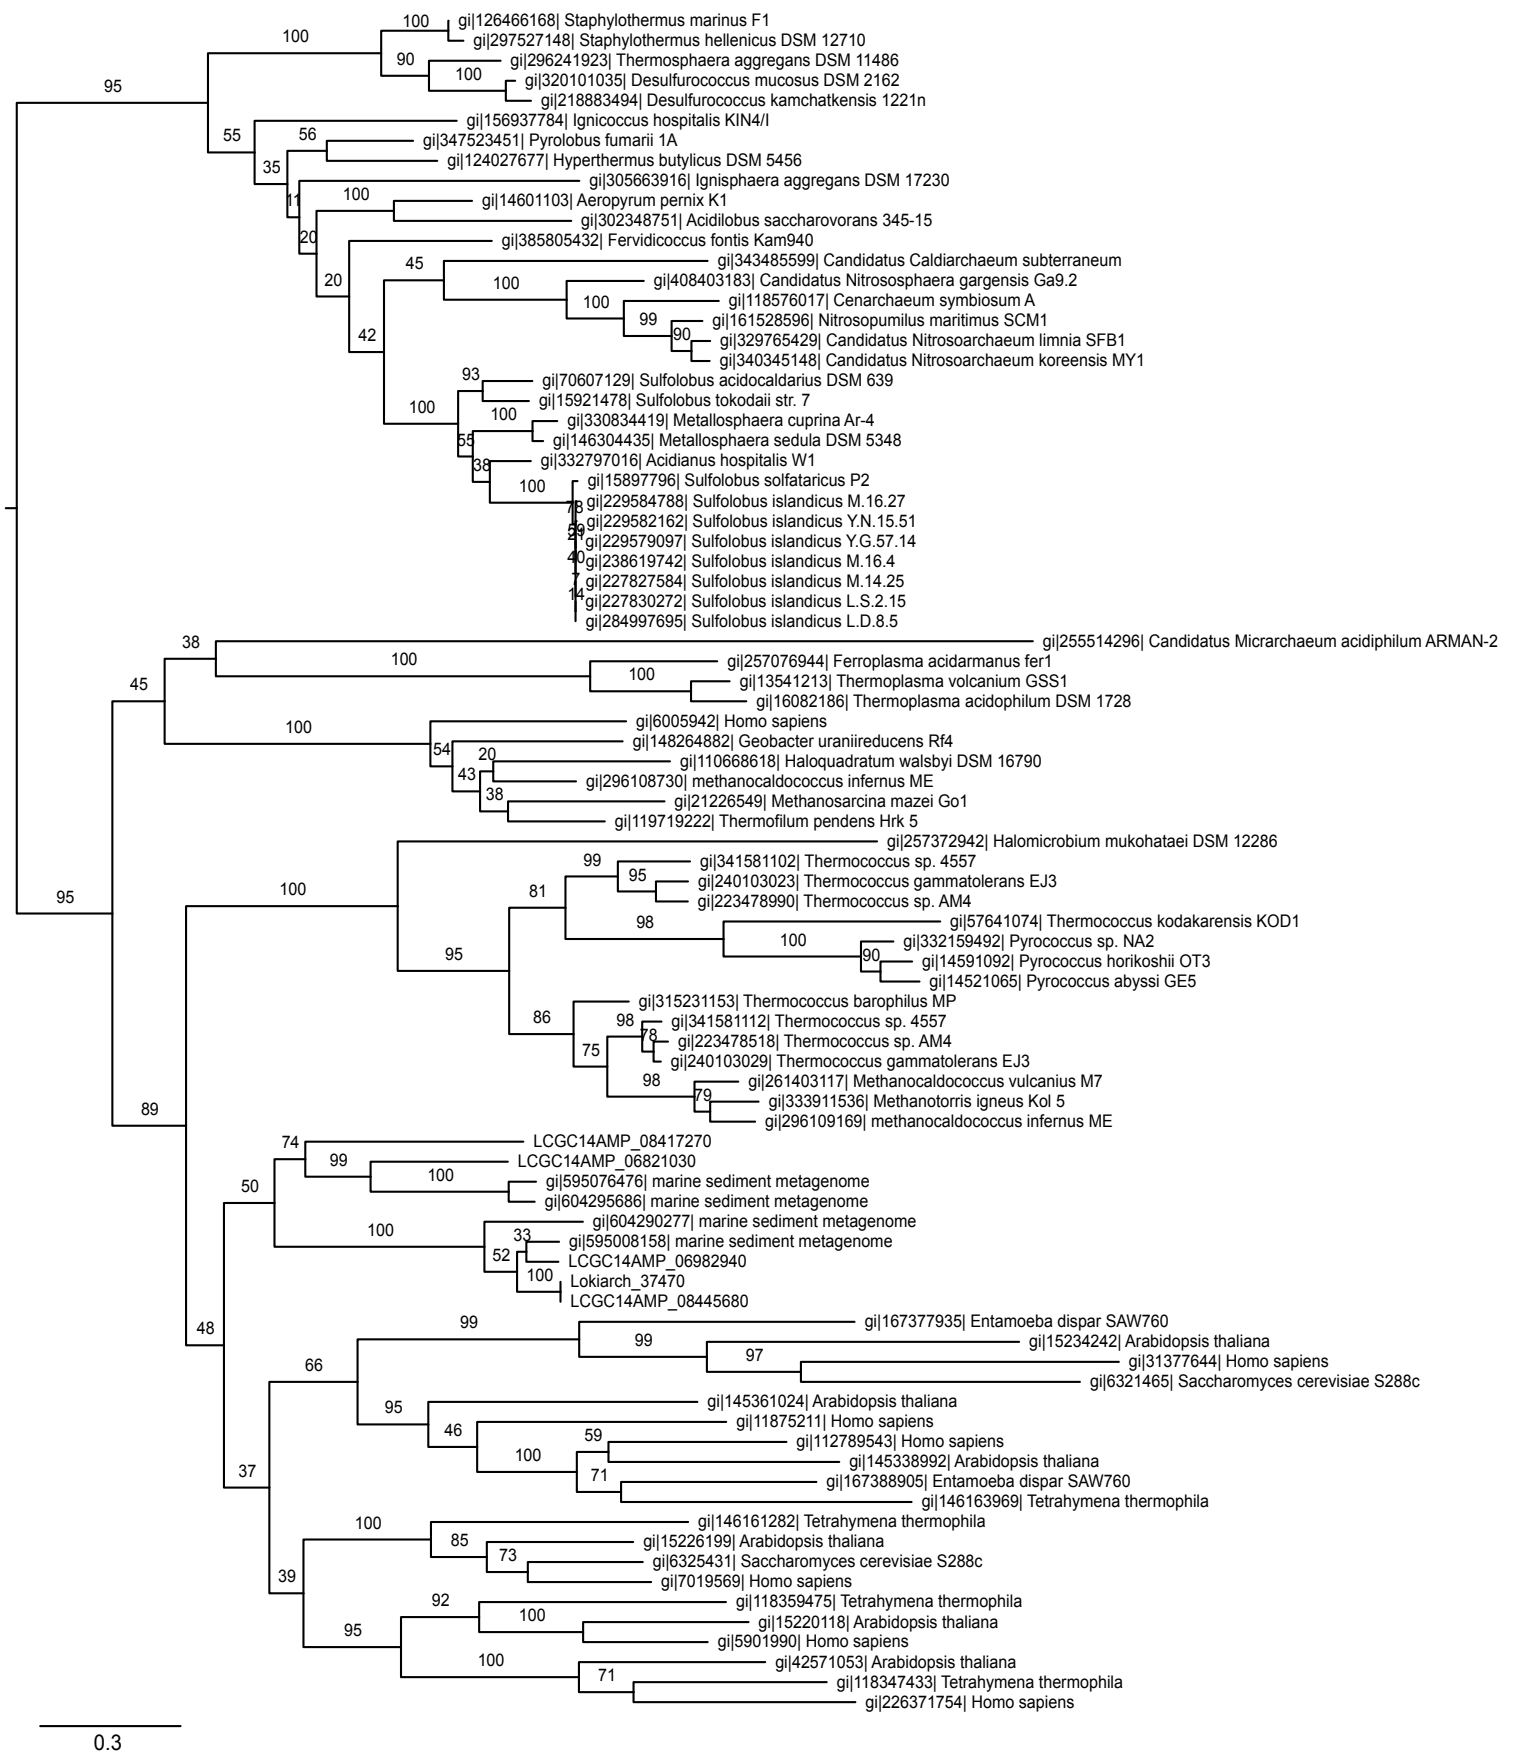

**Suppl. Figure S20:** Un-collapsed maximum likelihood phylogeny based on 388 aligned amino acid positions of AAA-type ATPase Vps4 homologs including homologs present in Lokiarchaeum as well as LCGC14AMP (shown in Fig. 4c). Sequences were aligned using MAFFT L-INS-i and 100 slow bootstraps were calculated. Scale bar indicates number of amino acid substitutions per site.

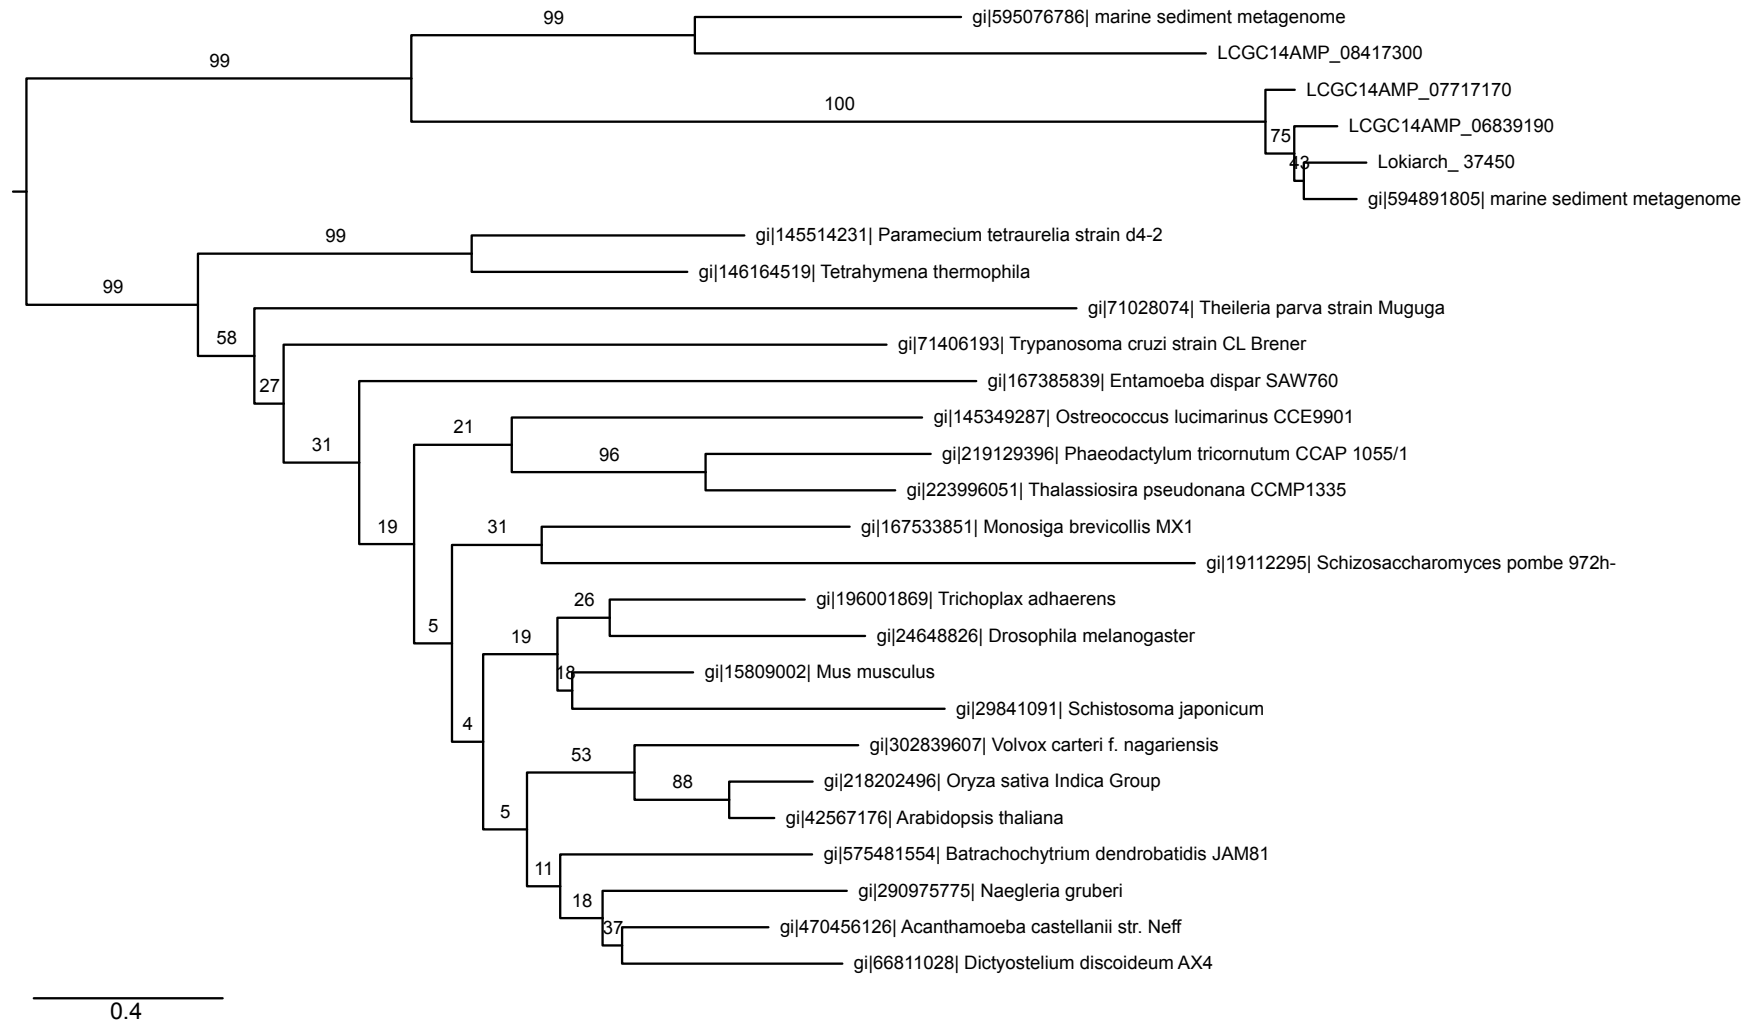

**Suppl. Figure S21:** Maximum likelihood phylogeny based on 226 aligned amino acid positions of lokiarchaeal EAP30 domain proteins including homologs present in Lokiarchaeum as well as LCGC14AMP. Sequences were aligned using MAFFT L-INS-i and 100 slow bootstraps were calculated. Scale bar indicates number of amino acid substitutions per site.

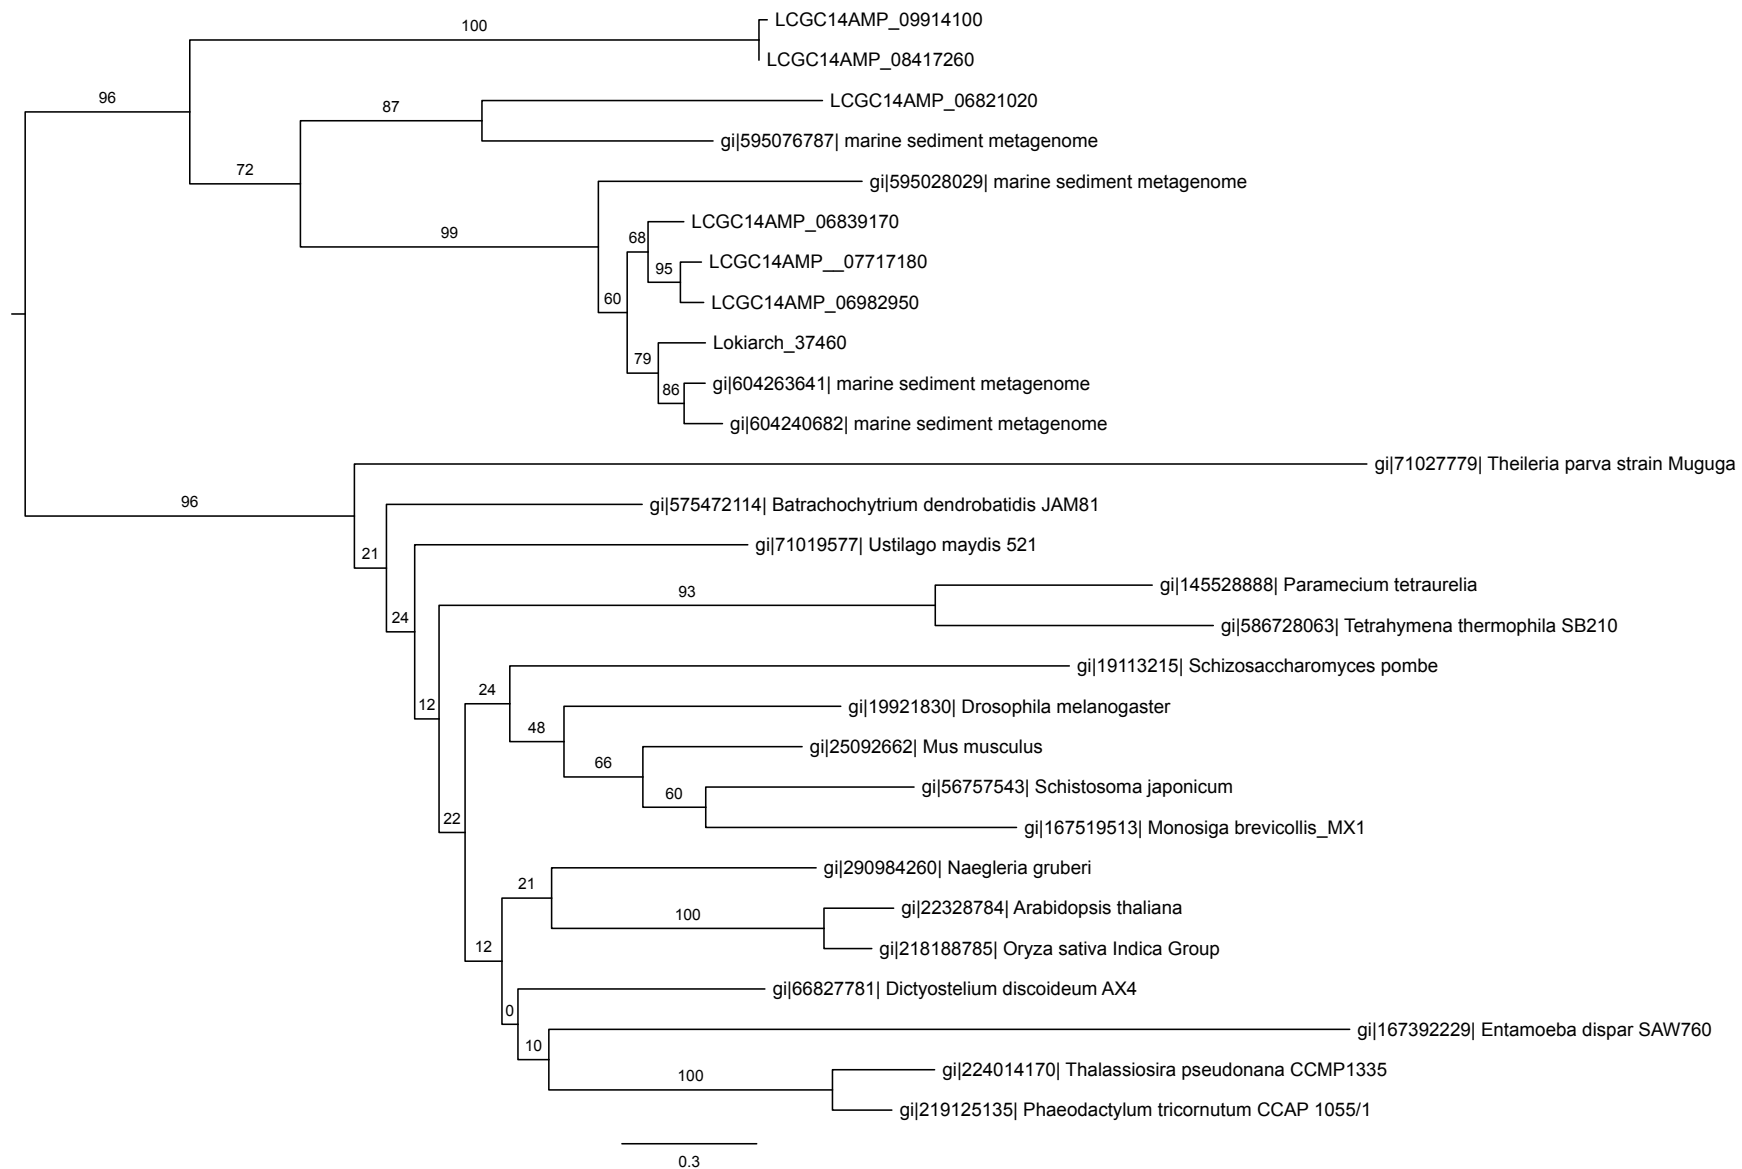

**Suppl. Figure S22:** Maximum likelihood phylogeny based on 168 aligned amino acid positions of Vps25 homologs including sequences of Lokiarchaeum as well as the LCGC14AMP metagenome. Sequences were aligned using MAFFT L-INS-i and 100 slow bootstraps were calculated. Scale bar indicates number of amino acid substitutions per site.

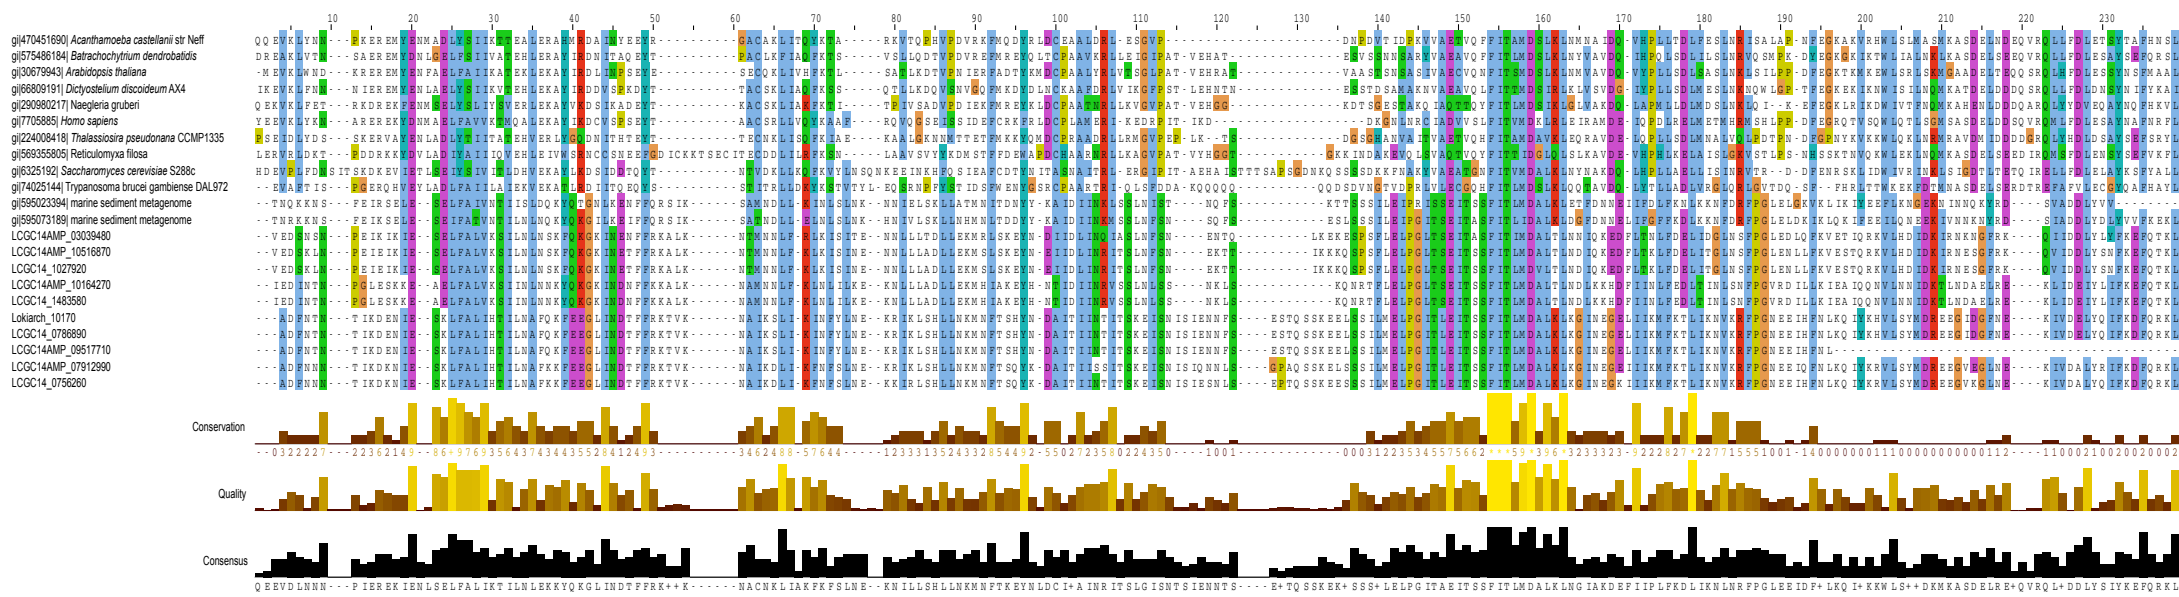

**Suppl. Figure S23: Multiple sequence alignment of eukaryotic and lokiarchaeal Vps28 homologs.** The alignment contains homologs of Lokiarchaeota and homologous sequences identified in publicly available metagenomes and was generated with MAFFT G-INS-i using default settings and the ends were manually trimmed.

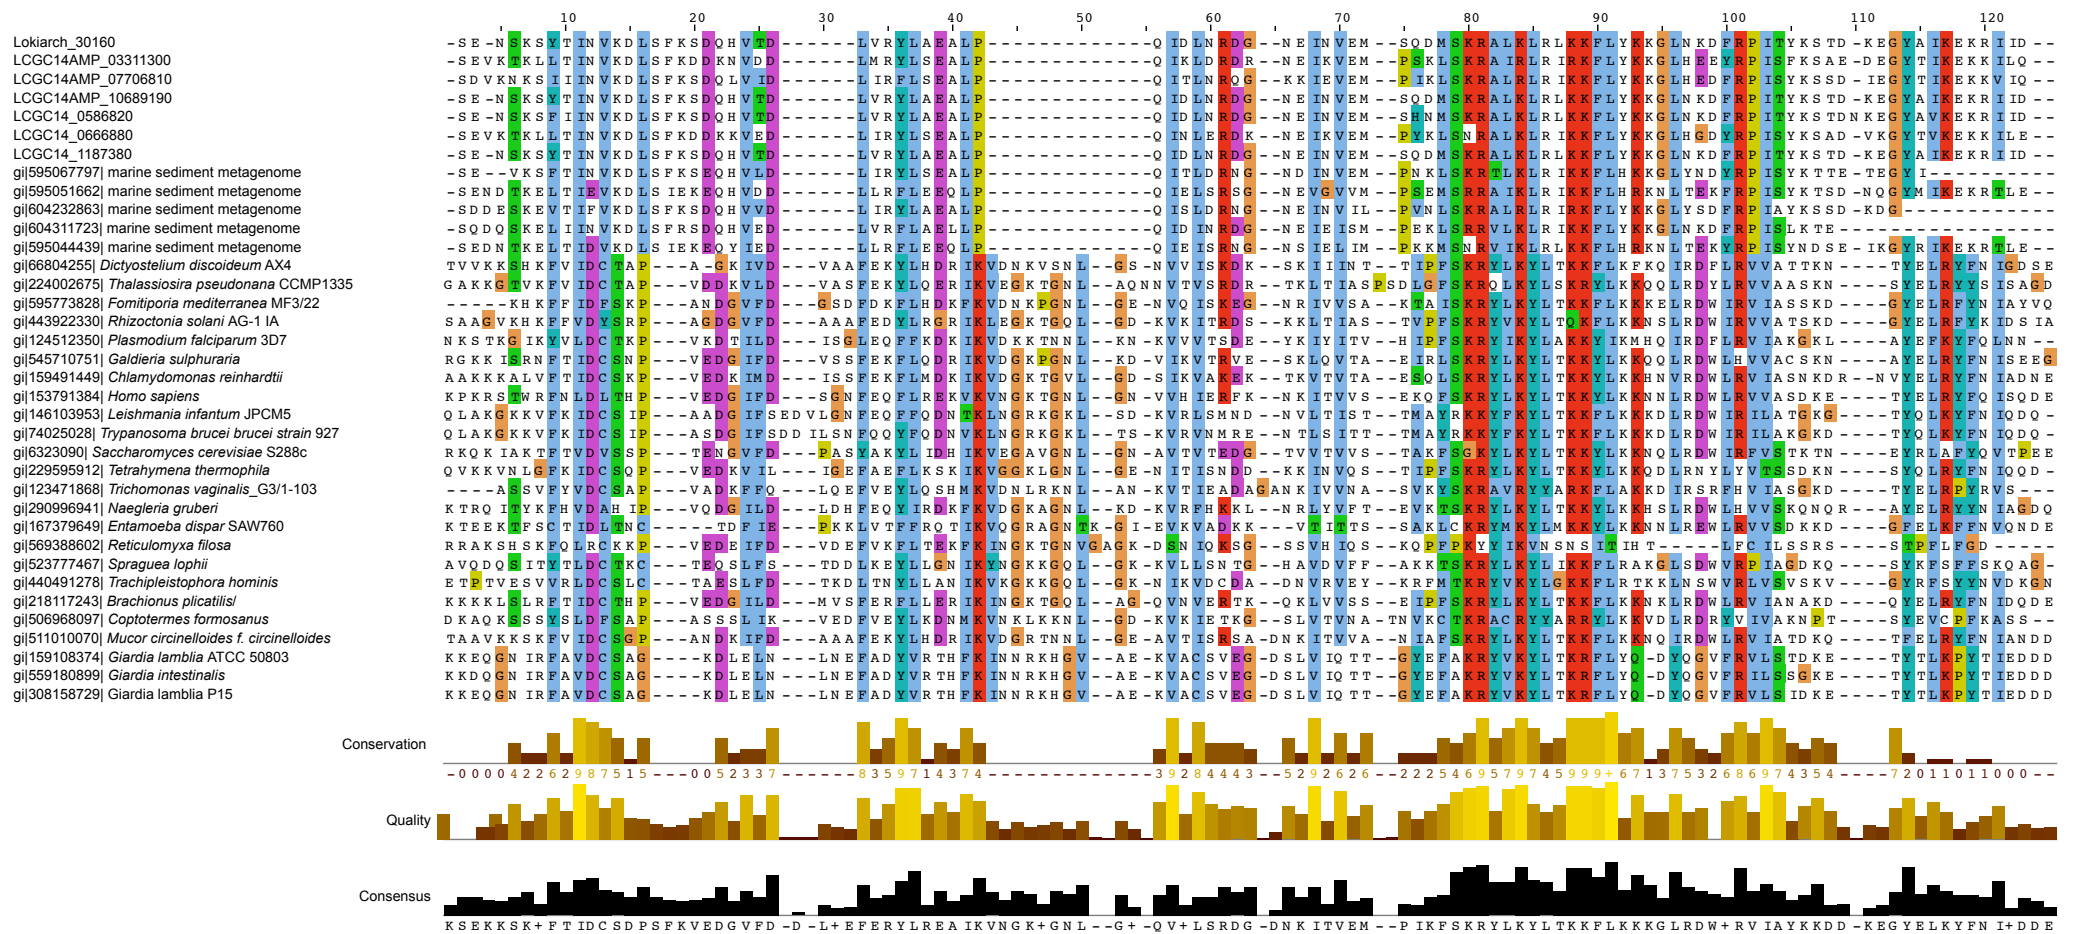

**Suppl. Figure S24: Multiple sequence alignment of eukaryotic and lokiarchaeal ribosomal protein L22 homologs.** The alignment contains homologs of Lokiarchaeota as well as homologous sequences present in publicly available metagenomes. The alignment was generated with MAFFT L-INS-i using default settings and the ends were manually trimmed.
